# Supplementary material for: The Cumulative Formation of R-loop Interacts with Histone Modifications to Shape Cell Reprogramming
Source: Int J Mol Sci. 2022 Jan 29;23(3):1567. doi: 10.3390/ijms23031567 (PMC8835745; doi:10.3390/ijms23031567)
Supplement: Supplementary file 1 [file ijms-23-01567-s001.zip]

Archive with 5 entries (5 files):
- ijms-15558986-Supplementary Figures.pdf
- Table S1.xlsx
- Table S2.xlsx
- Table S3.xlsx
- Table S4.xlsx
