# Supplementary material for: The Cumulative Formation of R-loop Interacts with Histone Modifications to Shape Cell Reprogramming
Source: Int J Mol Sci. 2022 Jan 29;23(3):1567. doi: 10.3390/ijms23031567 (PMC8835745; doi:10.3390/ijms23031567)
Supplement: Supplementary file 1 [file ijms-23-01567-s001.zip › Table S1.xlsx]

## Sheet: 1a
Table S1. The standardized R-loop signals on genes at different reprogramming stages.
Gene	D0_1	D0_2	D1_1	D1_2	D3_1	D3_2	D5_1	D5_2	D7_1	D7_2	iPSC_1	iPSC_2
Sox17	2.09625	0.460562	0.438793	0.336758	0.81798	0.216733	-1.15513	-1.15513	-1.15513	-1.15513	0.159586	0.0938585
Ube2w	1.20558	1.18907	0.0202985	-0.298469	0.814742	0.443861	0.815945	-0.275173	-1.78561	-1.78561	-0.220601	-0.124029
Adgrb3	1.50354	1.08302	-0.929393	-0.929393	0.485822	0.830252	-0.929393	-0.929393	-0.929393	-0.929393	0.666876	1.00685
Tsga10	1.47165	0.407528	-0.423743	0.856572	1.20242	0.626805	-1.57094	-1.57094	0.300498	0.0295946	-0.611978	-0.717463
Lyg2	2.09378	1.45512	-0.638067	-0.638067	-0.638067	-0.638067	-0.638067	-0.638067	-0.638067	-0.638067	0.903679	0.651954
Dnah7b	1.77045	-0.273809	-0.364723	-0.559105	0.800038	0.609897	-1.60227	-1.60227	1.04741	0.212999	-0.185351	0.146732
Hsfy2	2.15427	-0.816184	-0.868422	-0.237473	0.798592	0.284687	-0.991386	-1.50362	0.940976	0.0268445	0.181084	0.0306335
Mpp4	1.39658	0.756569	0.048289	0.863904	-1.23661	-1.23661	-1.23661	-1.23661	0.67708	1.06839	0.103814	0.031831
Fev	1.6306	1.40877	-0.668382	-0.668382	-0.668382	-0.668382	-0.668382	-0.668382	-0.668382	-0.668382	0.908958	1.39873
Ptma	2.10735	1.2142	0.229874	0.792912	-0.104026	0.185942	-1.03545	-1.03545	-1.03545	-1.03545	-0.262188	-0.022277
Ecel1	2.4062	1.84476	-0.425096	-0.425096	-0.425096	-0.425096	-0.425096	-0.425096	-0.425096	-0.425096	-0.425096	-0.425096
Sh3bp4	1.19344	1.01948	-1.16823	-1.16823	0.98844	0.723095	0.762031	0.800986	-1.16823	-1.16823	-0.299073	-0.515454
D2hgdh	2.41197	1.83755	-0.424951	-0.424951	-0.424951	-0.424951	-0.424951	-0.424951	-0.424951	-0.424951	-0.424951	-0.424951
Serpinb2	1.2414	1.06916	-0.19421	0.427746	-1.88794	-1.88794	0.379385	-0.0726088	0.263782	0.8537	-0.110635	-0.0818512
Dpp10	1.35011	1.06612	-0.0378162	0.267469	1.27747	1.00052	-1.48566	-1.4411	-0.302068	-0.545253	-0.551175	-0.598616
Lypd1	1.99182	1.13955	-0.825175	-0.825175	1.18832	0.465501	-0.825175	-0.825175	-0.825175	-0.825175	0.027867	0.138
Il20	2.11688	0.783092	-0.62705	-0.62705	-0.62705	-0.62705	-0.62705	-0.62705	-0.62705	-0.62705	0.548104	1.56832
Chit1	1.47516	0.702517	-0.927614	-0.927614	0.765079	0.457975	-0.927614	-0.927614	1.20285	0.962104	-0.927614	-0.927614
Ptprc	1.53686	-0.241026	-1.1562	-1.1562	1.38224	1.03115	-1.1562	-1.1562	0.218362	0.0867959	0.212031	0.398395
Rgsl1	2.21729	2.06211	-0.42794	-0.42794	-0.42794	-0.42794	-0.42794	-0.42794	-0.42794	-0.42794	-0.42794	-0.42794
Teddm1a	1.95699	0.341312	0.346399	0.287809	0.508324	0.14504	-1.74493	-1.74493	0.155364	0.454223	-0.31735	-0.388256
Tnr	2.17	1.7546	-0.592996	-0.592996	-0.592996	-0.592996	-0.592996	-0.592996	-0.592996	-0.592996	0.231304	0.588059
Sele	2.59302	1.5896	-0.418262	-0.418262	-0.418262	-0.418262	-0.418262	-0.418262	-0.418262	-0.418262	-0.418262	-0.418262
Aldh9a1	2.52608	1.21257	0.376738	0.11698	-0.150009	-0.543178	-0.531042	-0.650541	-0.0479856	-0.417913	-0.99041	-0.901295
Alyref2	1.04978	-0.0497089	0.876321	0.478504	0.667734	0.10748	-1.53167	-1.53167	1.03677	0.861535	-1.00773	-0.957339
Itln1	1.62545	0.848862	-0.0664315	0.590739	0.286486	0.465056	-1.24666	-1.24666	-1.24666	-1.24666	0.570458	0.666017
Dusp23	2.15862	0.684599	0.751202	0.604292	-0.861366	-0.861366	-0.861366	-0.861366	-0.861366	-0.861366	0.586117	0.383364
Olfr427	2.03581	0.73818	-0.639054	-0.639054	1.56246	0.775981	-0.639054	-0.639054	-0.639054	-0.639054	-0.639054	-0.639054
Olfr414	2.2979	1.9736	-0.42715	-0.42715	-0.42715	-0.42715	-0.42715	-0.42715	-0.42715	-0.42715	-0.42715	-0.42715
Fmn2	2.39555	1.85799	-0.425353	-0.425353	-0.425353	-0.425353	-0.425353	-0.425353	-0.425353	-0.425353	-0.425353	-0.425353
Vmn1r1	1.53664	0.0351938	-1.21783	-1.21783	0.0773505	0.622138	-1.21783	-1.21783	1.29037	0.649296	0.2697	0.390644
Cd46	1.58199	0.768337	0.340508	0.74222	0.355978	0.277011	0.853148	0.100278	-1.25487	-1.25487	-1.25487	-1.25487
Iyd	1.09635	0.2109	0.634836	0.821303	0.666799	0.367931	-1.32132	-1.32132	-1.32132	-1.32132	0.685909	0.801244
Cnksr3	1.24489	1.20589	-1.15898	-1.15898	0.299397	0.0800851	-1.15898	-1.15898	0.949356	1.24173	-0.262056	-0.123361
Ccdc28a	1.97556	0.914441	0.676176	0.934408	-0.878599	-0.878599	-0.878599	-0.878599	-0.878599	-0.878599	0.355721	0.415285
Ccn2	1.76808	0.61757	0.584126	0.834395	0.670519	0.396839	-1.20904	-1.20904	-1.20904	-1.20904	-0.0280822	-0.007268
Arg1	2.61598	1.55473	-0.417071	-0.417071	-0.417071	-0.417071	-0.417071	-0.417071	-0.417071	-0.417071	-0.417071	-0.417071
Gm9767	1.17815	0.568958	0.541081	0.776123	0.211033	0.279717	-1.77272	-1.77272	0.0487238	1.06495	-0.891689	-0.231602
Lama2	1.65339	1.17838	-1.40432	-1.33569	0.661841	0.307431	-0.740893	-1.19599	0.612102	-0.220012	0.0553498	0.42841
Cenpw	1.23131	0.813324	0.26421	0.432277	0.798507	0.873656	-1.38369	-1.28347	-1.16793	-1.36991	0.239634	0.552081
Dse	2.42188	1.2022	-0.702232	-0.702232	-0.702232	-0.702232	0.679368	0.326309	-0.702232	-0.702232	-0.0136247	-0.402746
Armc2	1.87995	0.790564	-0.657515	-0.657515	-0.657515	-0.657515	-0.657515	-0.657515	-0.657515	-0.657515	1.17408	1.41553
Lilrb4a	1.42859	0.599538	0.0926271	-0.694239	1.25527	0.329288	-1.59629	-1.59629	0.57735	0.625016	-0.714969	-0.305887
Ros1	1.53299	0.855765	-1.23274	-1.23274	0.0690855	0.00858481	-1.23274	-1.23274	0.751929	0.663029	0.151727	0.897858
Sh3rf3	1.15728	0.608829	-1.69882	-1.24129	0.824462	0.895313	-0.679736	-1.48534	0.485438	0.266915	0.557826	0.309121
Aifm2	1.7689	1.4556	0.752475	1.30387	-0.660106	-0.660106	-0.660106	-0.660106	-0.660106	-0.660106	-0.660106	-0.660106
Col6a2	2.37097	0.511806	0.268971	0.662961	0.527602	0.170769	-1.0249	-1.0249	-1.0249	-1.0249	-0.135868	-0.277618
Ptbp1	1.55109	1.45886	-0.0242626	0.945737	0.121424	0.514652	-1.14362	-1.14362	-1.14362	-1.14362	-0.1694	0.176376
Sppl2b	1.9939	0.671151	0.844924	0.535512	1.05272	0.0745109	-0.862119	-0.862119	-0.862119	-0.862119	-0.862119	-0.862119
D10Wsu102e	1.77527	-0.433498	0.180521	0.564265	-0.774623	-1.32902	1.48111	-0.827929	-0.414913	-1.1276	0.129499	0.776918
Btbd11	1.51181	1.17099	-1.04121	-1.04121	1.28841	0.73812	-1.04121	-1.04121	-0.568483	-0.511949	0.459022	0.0769219
Nr1h4	1.44597	1.29326	-1.22766	-1.22766	0.794055	0.503631	-1.22766	-1.22766	0.315808	-0.0384102	0.447904	0.148422
Eea1	2.20028	1.48135	-0.269392	-0.503295	0.873377	-0.0852701	-0.956519	-0.954334	-0.137818	-0.324951	-0.807366	-0.516063
Poc1b	1.94395	1.87774	-1.19117	-1.19117	-0.49431	-0.549903	0.0747139	-0.336546	0.142012	-0.404046	0.0718412	0.0568837
Lrriq1	1.38546	0.892575	-1.2168	-1.2168	0.407051	0.205019	-1.2168	-1.2168	1.20338	0.83868	-0.0365143	-0.0284338
Tmtc2	2.30257	0.709493	0.140346	0.10445	1.01768	0.100086	-1.28074	-1.05202	-0.307593	-0.152371	-0.756108	-0.825791
Iltifb	2.22743	1.01173	-0.78549	-0.78549	1.05349	0.416235	-0.78549	-0.78549	-0.78549	-0.78549	0.12429	-0.120231
Baz2a	1.87728	0.0750263	0.280359	0.368034	0.92804	-0.362892	-1.13075	-1.13075	-1.13075	-1.13075	0.34099	1.01615
Mtfp1	2.77317	1.28837	-0.406154	-0.406154	-0.406154	-0.406154	-0.406154	-0.406154	-0.406154	-0.406154	-0.406154	-0.406154
Sec14l2	1.34468	0.355162	1.20521	1.17011	0.661226	0.438777	-1.159	-1.159	-1.159	-1.159	-0.0507083	-0.48845
Mrps24	1.87425	0.753255	0.464198	0.63785	-0.315494	-0.0345971	-1.16095	-1.16095	-1.16095	-1.16095	0.576067	0.688253
Egfr	1.79008	-0.119311	0.242045	0.59682	0.576066	0.332254	-1.21361	-1.21361	-1.21361	-1.21361	0.693569	0.742914
Ehbp1	2.61793	0.0712056	-0.0687597	0.707258	0.329752	0.228905	-0.925584	-0.925584	-0.925584	-0.925584	-0.217615	0.0336619
Ubtd2	1.19125	0.406413	-1.30476	-1.30476	1.01373	0.131082	-1.30476	-1.30476	0.517197	0.556601	0.711834	0.690918
Fgf18	1.73603	0.750021	0.748613	0.510994	0.366152	0.143057	-1.24265	-1.24265	-1.24265	-1.24265	0.272027	0.443717
Flt4	2.18959	1.68068	-0.731831	-0.731831	0.338782	-0.0707077	-0.731831	-0.731831	-0.731831	-0.731831	0.0372081	0.215434
Tcf7	1.38757	1.13459	-0.913696	-0.913696	0.949798	0.0763757	-0.913696	-0.913696	-0.913696	-0.913696	0.982553	0.951284
Anxa6	1.55778	-0.026168	-1.56873	-1.56873	1.36763	1.18742	-0.0961326	-0.166568	-0.168087	0.00710485	-0.551756	0.0262329
Elac2	1.36862	0.887049	-0.406629	1.08577	-0.529507	-0.603334	-1.50491	-1.63638	-0.210748	-0.0712924	0.660724	0.960647
Myocd	0.904454	0.350152	-0.642845	0.0821152	0.235556	0.889851	0.868141	0.78989	-1.77691	-1.77691	0.778764	-0.702262
Map2k4	1.65132	-0.122305	0.921505	1.57426	0.675211	0.0846801	-1.03055	-1.03055	-1.03055	-1.03055	-0.337253	-0.325201
Usp43	2.41083	1.08996	-0.610777	-0.610777	-0.610777	-0.610777	-0.610777	-0.610777	-0.610777	-0.610777	0.859762	0.525671
Cfap52	1.89422	0.579617	-0.648307	-0.648307	-0.648307	-0.648307	-0.648307	-0.648307	-0.648307	-0.648307	1.22516	1.48746
Trpv1	1.91199	1.29133	-0.832444	-0.832444	1.10914	0.421953	-0.832444	-0.832444	-0.832444	-0.832444	-0.0659505	0.326202
Lyrm9	1.22207	0.985278	0.167282	0.119094	0.549893	0.108305	-1.26264	-1.26264	-1.26264	-1.26264	0.942552	0.956079
Spaca3	1.75327	1.28659	-0.315881	-0.0433182	0.917008	0.275465	-1.39835	-1.39835	0.530996	-0.247738	-0.871978	-0.487718
Ccl1	1.63617	1.48509	-0.888849	-0.888849	0.853532	0.578243	-0.888849	-0.888849	-0.888849	-0.888849	0.319227	0.460839
Ccl5	1.50732	0.290298	0.466759	0.334162	1.22334	0.0880813	0.316407	0.152595	-1.75708	-1.75708	-0.694922	-0.169871
Ddx52	1.72296	-0.550101	0.695199	0.518652	1.13791	0.26097	0.429908	-0.38528	-1.59143	-1.59143	-0.271618	-0.375734
Sgca	2.49868	1.72431	-0.422299	-0.422299	-0.422299	-0.422299	-0.422299	-0.422299	-0.422299	-0.422299	-0.422299	-0.422299
Snf8	1.49065	0.682216	-0.93002	-0.93002	0.467147	0.948199	-0.93002	-0.93002	-0.93002	-0.93002	0.891628	1.10027
Atp5g1	2.9439	0.917733	-0.386163	-0.386163	-0.386163	-0.386163	-0.386163	-0.386163	-0.386163	-0.386163	-0.386163	-0.386163
Hoxb13	1.65784	0.104492	-0.549444	0.650054	0.272821	0.00244432	-1.79269	-1.79269	-0.121038	0.573973	0.20055	0.793691
Tcap	1.77038	0.791751	0.693762	1.50767	-0.854581	-0.854581	-0.854581	-0.854581	-0.854581	-0.854581	0.0469703	0.316951
Krt40	1.65691	0.784454	-0.853797	-0.853797	1.5674	0.879265	-0.853797	-0.853797	-0.853797	-0.853797	0.0539001	0.18085
Gm11568	1.58663	1.15085	-1.20508	-1.20508	0.413287	0.257703	0.264849	1.01654	-1.20508	-1.20508	0.0591873	0.0712657
Nbr1	2.51077	1.70776	-0.421853	-0.421853	-0.421853	-0.421853	-0.421853	-0.421853	-0.421853	-0.421853	-0.421853	-0.421853
Arhgap27	2.49023	1.00615	-0.599193	-0.599193	-0.599193	-0.599193	-0.599193	-0.599193	-0.599193	-0.599193	0.457745	0.83942
Prkca	1.44477	0.89038	-0.426011	-0.372123	-0.105178	-0.131703	-1.60245	-1.60245	1.15794	1.01631	0.201254	-0.470748
Fam228b	2.12879	-0.071747	-0.127069	0.19863	0.736151	0.278708	-1.6137	-1.6137	0.569663	0.136591	-0.457842	-0.164469
Slc7a15	1.30139	0.130666	0.908173	1.24232	0.653277	0.85793	-1.21848	-1.21848	-1.16596	-1.17395	-0.182339	-0.13456
Pik3cg	1.8496	1.12142	0.261707	1.12331	-0.87438	-0.87438	-0.87438	-0.87438	-0.87438	-0.87438	0.506662	0.383577
Gm527	1.86369	1.1692	0.0911213	0.508675	-0.0167572	-0.223697	-1.54227	-1.54227	-0.6555	-0.406613	0.697709	0.0567201
Rps29	2.27371	1.50426	0.1937	0.430445	-0.407156	-0.507579	-0.516273	-0.875594	0.0716244	-0.262949	-0.971772	-0.93242
Nemf	2.51034	1.09284	0.362714	0.617631	-0.339012	-0.594477	-0.694083	-0.858891	-0.155873	-0.553049	-0.762856	-0.625286
Pygl	1.67823	0.86499	-0.889386	-0.889386	0.439741	0.134726	-0.889386	-0.889386	-0.889386	-0.889386	1.01814	1.20049
Fntb	2.1068	0.7509	-0.858237	-0.858237	0.841465	0.792803	-0.858237	-0.858237	-0.858237	-0.858237	0.441414	0.216043
Dcaf5	2.36922	0.615595	0.670939	0.897609	-0.787731	-0.787731	-0.787731	-0.787731	-0.787731	-0.787731	0.169893	0.00313278
Slc8a3	2.15646	2.12519	-0.428165	-0.428165	-0.428165	-0.428165	-0.428165	-0.428165	-0.428165	-0.428165	-0.428165	-0.428165
Flvcr2	2.37823	0.814982	0.101133	0.961961	-0.177624	-0.686595	-0.284881	-0.54911	0.213712	-0.610776	-0.851529	-1.3095
Vipas39	1.87283	0.417308	1.32437	1.2531	-0.815331	-0.815331	-0.815331	-0.815331	0.063472	-0.0390982	-0.815331	-0.815331
BB287469	1.76381	0.234393	0.914643	1.12752	0.655231	0.0776711	-1.14681	-1.14681	-1.14681	-1.14681	-0.172916	-0.0131074
Gm2016	1.03644	0.129749	0.444498	0.88854	0.903956	0.386136	-1.30976	-1.30976	-1.30976	-1.30976	0.871379	0.578339
Gm2022	2.65167	1.4987	-0.415037	-0.415037	-0.415037	-0.415037	-0.415037	-0.415037	-0.415037	-0.415037	-0.415037	-0.415037
Gm2042	1.43326	0.654443	-0.900534	-0.900534	0.371857	0.335919	-0.900534	-0.900534	-0.900534	-0.900534	1.31892	1.28881
Kcnk10	1.97284	-1.25254	-0.441729	-1.05198	1.07351	0.734415	-0.54501	-0.768426	0.321284	-0.869335	-0.0645472	0.891528
Spata7	1.56269	0.409652	0.157271	0.986455	1.06996	0.406369	-1.22684	-1.22684	-1.22684	-1.22684	0.0792712	0.235711
Serpina12	2.22109	0.218509	1.00197	0.923645	-0.800917	-0.800917	-0.800917	-0.800917	-0.800917	-0.800917	-0.108658	0.548952
Gdi2	1.33702	1.00486	-0.937188	-0.937188	1.19905	0.55234	-0.937188	-0.937188	-0.937188	-0.937188	0.665729	0.864125
Calm4	1.5797	1.21538	0.354373	0.573201	-1.15464	-1.15464	1.04221	0.242802	-1.15464	-1.15464	-0.0954868	-0.293595
Akr1c13	1.94414	1.2733	-0.659244	-0.659244	-0.659244	-0.659244	-0.659244	-0.659244	1.08977	0.966743	-0.659244	-0.659244
Zmynd11	2.44177	0.867083	0.351906	0.17742	0.47356	0.0620696	-0.855416	-1.2794	-0.311565	-0.912547	-0.718515	-0.296357
Nid1	1.56501	0.20425	-1.27338	-1.27338	-1.27338	-1.27338	0.240414	0.596089	0.658276	0.722926	0.697751	0.408803
Zfp184	2.1468	1.75668	-0.600636	-0.600636	-0.600636	-0.600636	-0.600636	-0.600636	-0.600636	-0.600636	0.370906	0.530701
Carmil1	2.33562	1.31095	-0.835898	-0.835898	-0.142459	-0.220682	-0.835898	-0.835898	0.65572	0.309189	-0.334998	-0.569748
Prl3a1	2.27464	1.99975	-0.427438	-0.427438	-0.427438	-0.427438	-0.427438	-0.427438	-0.427438	-0.427438	-0.427438	-0.427438
Agtr1a	1.83438	1.26531	-0.890448	-0.890448	0.620888	0.482373	-0.890448	-0.890448	-0.890448	-0.890448	0.636897	0.50284
Irf4	2.13917	0.994336	-0.834923	-0.834923	0.872614	0.599109	-0.834923	-0.834923	-0.834923	-0.834923	0.0431764	0.361133
Exoc2	1.80334	0.0020483	1.09512	1.09501	0.188282	-0.227458	-1.1155	-1.1155	-1.1155	-1.1155	-0.0275304	0.533187
Tmem170b	2.03859	1.16892	-0.0656314	0.243565	0.484627	0.467664	-1.11029	-1.11029	-1.11029	-1.11029	-0.0584633	0.161876
Ranbp9	2.29082	1.98161	-0.427243	-0.427243	-0.427243	-0.427243	-0.427243	-0.427243	-0.427243	-0.427243	-0.427243	-0.427243
Spata31d1a	2.64778	-0.488087	-0.488087	-0.488087	-0.488087	-0.488087	-0.488087	-0.488087	-0.488087	-0.488087	0.470844	1.27416
Cdk20	1.43762	0.0854144	0.398633	0.48029	0.765167	0.259817	-1.26356	-1.26356	-1.26356	-1.26356	1.10781	0.519467
Nlrp4f	1.29711	0.243176	-1.20127	-1.20127	0.138049	0.393128	-1.20127	-1.20127	0.442152	-0.190684	1.23053	1.25161
Adcy2	1.52122	-0.192619	0.163729	-0.484172	1.50351	0.0742212	-0.25262	-0.243664	-1.61391	-1.61391	0.303495	0.834729
Nkd2	2.57688	0.520406	0.77829	0.593355	-0.720794	-0.720794	-0.720794	-0.720794	-0.720794	-0.720794	-0.113496	-0.0306667
Zdhhc11	1.85982	-0.0570898	0.370731	0.811775	0.205422	0.615616	-1.19613	-1.19613	-1.19613	-1.19613	0.245364	0.732876
Slf1	1.67474	0.718623	1.04137	1.48957	-0.966868	-1.02345	-0.770655	-1.08659	0.137765	-0.49369	-0.141062	-0.579749
Hapln1	1.1741	0.659905	-1.28378	-1.28378	0.855241	0.356476	-1.28378	-1.28378	0.317603	-0.000229466	0.706678	1.06533
Ap3b1	1.54394	0.0682134	0.12094	0.150466	1.17374	0.636458	-1.50119	-1.50119	-0.70579	-0.99762	0.132554	0.879479
Foxd1	1.96312	0.27643	-0.206864	0.423127	-1.13701	-1.13701	-1.13701	-1.13701	0.0910291	0.796443	0.99511	0.209625
Map1b	2.01198	0.230103	0.738983	0.570785	0.776944	0.751702	-1.05733	-1.05733	-1.05733	-1.05733	-0.315212	-0.535952
Gm3752	1.46215	1.1607	-0.265511	-0.0274253	1.13029	0.815331	-1.39204	-1.38818	0.205757	0.0719864	-0.978935	-0.794136
Gm3317	1.53533	1.31559	-0.176448	-0.186661	0.71699	-0.569466	0.45574	-0.563474	0.582426	0.0903019	-1.68384	-1.5165
Gm3383	1.62481	0.810192	-0.75507	0.30349	0.822762	0.254878	-0.370987	-0.624014	0.839796	0.255866	-1.53948	-1.62224
Gm3667	1.48782	0.524209	-0.151777	0.771671	1.08613	0.781123	0.0425357	-0.979019	-0.1714	-0.20736	-1.62243	-1.5615
Lrrc3b	1.7006	1.15686	-0.714737	-0.555234	0.847907	0.401867	-0.52046	-0.160258	-1.48717	-1.48717	0.497649	0.320145
Chchd1	2.63043	0.698688	-0.582061	-0.582061	0.689735	0.637632	-0.582061	-0.582061	-0.582061	-0.582061	-0.582061	-0.582061
Vdac2	2.13214	1.36986	-0.639621	-0.639621	0.791886	0.823088	-0.639621	-0.639621	-0.639621	-0.639621	-0.639621	-0.639621
E330034G19Rik	1.47071	0.58182	0.428466	1.17614	0.667144	0.746559	-1.20112	-1.20112	-1.20112	-1.20112	-0.381114	0.114759
Rft1	2.18144	2.09965	-0.428109	-0.428109	-0.428109	-0.428109	-0.428109	-0.428109	-0.428109	-0.428109	-0.428109	-0.428109
Gm21977	1.2247	-0.481705	0.970894	1.16395	0.702978	0.500768	0.213262	0.406079	-1.52353	-1.52353	-0.878945	-0.774932
Olfr733	2.22775	1.6145	-0.599664	-0.599664	-0.599664	-0.599664	-0.599664	-0.599664	-0.599664	-0.599664	0.256534	0.698527
Gm5622	1.34658	0.950063	0.172034	0.575423	0.809783	0.150851	-1.88994	-1.88994	0.122896	0.0580945	-0.19068	-0.215152
Jph4	2.02093	-0.365074	-1.16744	-0.812241	0.13365	-0.114966	0.642155	-1.75145	0.130416	0.551851	0.940255	-0.208089
Phf11b	2.70536	0.489888	-0.23451	0.213258	0.150379	0.023213	0.0274665	-0.0366646	-1.1897	-1.1897	-0.368258	-0.590738
Enox1	2.17467	1.72565	-0.597388	-0.597388	-0.597388	-0.597388	-0.597388	-0.597388	-0.597388	-0.597388	0.600344	0.27843
Ghr	1.60909	0.573705	-1.05158	-0.390021	1.03301	0.311868	-1.61598	-1.61598	0.353451	0.00997834	0.338877	0.443567
Fyb	1.7538	0.818067	-0.125446	0.93111	0.590147	-0.300738	-1.15696	-1.15696	-1.15696	-1.15696	0.722978	0.237924
Npr3	1.49641	0.382808	-0.389313	0.675456	0.115943	0.188001	-1.87215	-1.87215	-0.0778558	0.401408	0.880666	0.0707682
Dap	1.76315	1.26778	-0.861323	-0.861323	0.774358	1.09269	-0.861323	-0.861323	-0.861323	-0.861323	0.0980463	0.171912
Klf10	1.82479	0.852859	-0.659181	-0.659181	-0.659181	-0.659181	-0.659181	-0.659181	-0.659181	-0.659181	1.51872	1.07708
Dpys	1.76063	0.53818	-1.18031	-1.18031	0.962059	0.179433	0.570973	0.861547	-1.18031	-1.18031	-0.0917552	-0.0598337
Nudcd1	1.94578	0.81713	0.898738	0.0552291	0.724404	0.0407772	-1.10226	-1.10226	0.379708	-0.452712	-1.10226	-1.10226
Washc5	1.02596	1.02079	0.14507	0.303265	0.460014	0.154059	-1.99648	-1.99648	0.272121	0.624058	-0.252763	0.240388
Mb	1.75462	0.947353	-0.850406	-0.850406	1.52022	0.53071	-0.850406	-0.850406	-0.850406	-0.850406	0.299066	0.0504727
Apol7a	1.75399	0.242963	0.561463	0.732735	0.847271	0.626089	-1.2137	-1.2137	-1.2137	-1.2137	0.100617	-0.0103447
Syngr1	2.0508	0.798316	-1.11766	-1.11766	0.214348	0.626528	-1.11766	-1.11766	0.81274	0.0226166	-0.199514	0.144789
Cyp2d40	2.56329	1.12475	-0.581102	-0.581102	-0.581102	-0.581102	-0.581102	-0.581102	-0.581102	-0.581102	0.507825	0.452951
Tspo	2.23887	2.03899	-0.427785	-0.427785	-0.427785	-0.427785	-0.427785	-0.427785	-0.427785	-0.427785	-0.427785	-0.427785
Cerk	2.80283	0.613606	0.305878	0.0424891	0.0883847	0.0149581	-0.667458	-0.653771	-0.398797	-0.964255	-0.621225	-0.562641
Cntn1	1.87719	0.511645	0.514973	0.472167	0.695989	0.911645	-1.44105	-1.44105	-0.664615	-0.769907	-0.350719	-0.316273
Olfr288	1.79308	0.049952	-0.108136	0.462895	-1.20223	-1.20223	-1.20223	-1.20223	0.824812	0.700956	0.457909	0.627444
Nckap5l	2.09252	1.23951	-0.646972	-0.646972	-0.646972	-0.646972	-0.646972	-0.646972	-0.646972	-0.646972	0.786404	1.05734
Krt88	2.21276	0.563428	0.295927	0.744805	0.860774	0.277196	-0.964559	-0.964559	-0.964559	-0.964559	-0.507455	-0.5892
Tns2	1.64501	0.558153	-0.605587	0.284854	1.267	0.0621945	-0.300966	0.969749	-1.47628	-1.47628	-0.234691	-0.693158
Atf7	1.5924	-0.252876	-0.0711212	0.907406	0.267432	0.176945	-1.64731	-1.64731	0.240212	-0.495465	-0.34337	1.27306
Cluap1	1.74898	0.138512	0.498697	1.12696	1.1385	0.0367569	-1.12399	-1.12399	-1.12399	-1.12399	-0.226053	0.0335879
Zc3h7a	2.02513	1.62558	-0.635325	-0.635325	-0.635325	-0.635325	-0.635325	-0.635325	-0.635325	-0.635325	0.748136	0.68376
Myh11	1.43229	-0.202557	0.441434	0.517647	0.956423	1.15437	-0.333747	-0.448695	-1.69484	-1.69484	-0.320243	0.192758
Vpreb1	1.78942	0.101211	-0.339549	0.130628	0.472016	0.234307	-1.80426	-1.80426	0.774546	0.423524	-0.197813	0.220231
Rimbp3	1.70762	0.507684	-1.15129	-1.15129	0.947984	0.42506	-1.15129	-1.15129	1.14826	-0.0564402	-0.283079	0.208061
Mb21d2	2.07681	0.0311398	0.566436	0.403337	0.512679	0.4114	-1.13756	-1.13756	-1.13756	-1.13756	-0.196816	0.745237
Kpna1	1.87171	1.3431	0.75271	0.876982	-0.0508066	-1.08247	-0.768674	-1.07941	0.18076	-0.694374	-0.700852	-0.648673
Cox17	1.44225	1.06533	-0.436197	0.825789	-1.16941	-1.16941	-1.16941	-1.16941	1.04757	0.414567	0.406956	-0.0886127
Nepro	2.36992	1.88929	-0.425921	-0.425921	-0.425921	-0.425921	-0.425921	-0.425921	-0.425921	-0.425921	-0.425921	-0.425921
Ccdc54	1.31515	-0.0189949	-1.77738	-1.38071	0.583148	-0.063269	0.950131	0.206861	1.14633	0.573208	-0.549266	-0.985205
Rpl24	1.64537	0.710208	-1.13152	-1.13152	1.06048	0.625595	1.00476	-0.330925	-1.13152	-1.13152	-0.178637	-0.0107849
Tbc1d23	2.06092	0.245258	0.529668	0.691291	0.593437	0.067486	0.569791	-1.33817	-0.536055	-1.26453	-1.17344	-0.445654
Olfr195	2.07082	1.58359	-0.633225	-0.633225	-0.633225	-0.633225	-0.633225	-0.633225	-0.633225	-0.633225	0.697391	0.713988
Speer2	1.85287	0.90634	-0.865429	-0.865429	1.23067	0.10772	-0.865429	-0.865429	-0.865429	-0.865429	0.798451	0.296522
Fau	2.59565	1.58564	-0.41813	-0.41813	-0.41813	-0.41813	-0.41813	-0.41813	-0.41813	-0.41813	-0.41813	-0.41813
2310079G19Rik	1.86213	0.250694	0.1722	0.3909	0.743975	5.39e-05	-1.78178	-1.78178	0.523664	0.0373865	-0.105109	-0.312343
Krtap13-1	2.00997	0.667762	-0.863389	-0.863389	0.943684	0.0687392	-0.863389	-0.863389	-0.863389	-0.863389	0.611136	0.879049
Pigp	1.66048	0.902166	-0.921132	-0.921132	0.641027	0.841705	-0.921132	-0.921132	-0.921132	-0.921132	0.494418	0.986999
Dynlt1b	1.77695	-0.9729	1.73	0.605707	-0.0475726	-0.344187	-0.714682	-1.09943	-0.333985	0.753037	-0.902342	-0.4506
Sytl3	2.16458	0.444932	-0.318991	-0.375793	0.743026	0.243869	0.222117	-0.704718	0.407207	0.151013	-1.70713	-1.27011
Unc93a2	1.93408	1.1856	-0.852707	-0.852707	0.758705	0.892504	-0.852707	-0.852707	-0.852707	-0.852707	0.34469	0.000658339
Gm1604a	1.52588	-0.0281635	0.931816	1.04503	0.988055	0.733644	-0.594116	-0.591955	-0.538542	-0.823124	-1.41842	-1.23011
Vmn2r97	1.68203	0.741004	0.411332	0.590837	0.044377	-0.0955429	-1.21874	-1.21874	0.639347	0.861557	-1.21874	-1.21874
Vmn2r98	1.78965	0.650067	-1.19012	-1.19012	0.180371	0.674201	-1.19012	-1.19012	1.08092	0.165948	0.140632	0.0787088
Vmn1r231	1.91493	1.22812	0.384336	1.17616	-0.839556	-0.839556	-0.839556	-0.839556	-0.839556	-0.839556	0.100326	0.233462
Vmn1r234	1.31563	0.770472	-0.476214	0.307499	-0.0358476	0.388557	-1.85246	-1.85246	0.442246	0.832948	-0.38741	0.547032
Zfp53	1.47963	-0.129015	-0.617072	0.505293	1.35794	-0.672649	0.45748	0.184349	-0.191097	0.778566	-1.61867	-1.53475
Ndufb10	2.66883	1.47091	-0.413975	-0.413975	-0.413975	-0.413975	-0.413975	-0.413975	-0.413975	-0.413975	-0.413975	-0.413975
Wdr24	1.67171	1.43213	0.572819	0.632514	-0.882653	-0.882653	-0.882653	-0.882653	-0.882653	-0.882653	0.129443	0.857298
Umodl1	1.51967	0.48078	-0.900176	-0.900176	0.779001	0.198333	-0.900176	-0.900176	-0.900176	-0.900176	1.29897	1.1243
Pknox1	2.06938	0.957807	-0.848728	-0.848728	0.974426	0.610879	-0.848728	-0.848728	-0.848728	-0.848728	0.382087	0.0977848
Notch3	1.72602	0.874395	-0.829729	-0.829729	1.57442	0.734252	-0.829729	-0.829729	-0.829729	-0.829729	-0.194756	0.26404
Olfr63	1.9698	-0.0840321	0.625475	0.920943	0.112046	0.383888	0.513211	-0.332772	-1.53828	-1.53828	-0.708774	-0.323232
Olfr92	2.1797	1.07867	-1.12094	-0.0447941	-0.519329	-0.12517	-0.256609	-1.15184	1.02893	0.209846	-0.300909	-0.977558
Olfr131	1.21755	0.308307	1.18947	0.825191	0.588438	0.58912	-0.174917	-0.286262	-1.76932	-1.76932	-0.328005	-0.390251
Rcan2	2.26461	1.3556	0.15544	0.244728	-1.05497	-0.963549	-0.661501	-0.586867	-0.781302	-0.56524	0.194794	0.398259
Usp49	1.76246	-0.144533	0.403344	0.00760148	1.52482	1.11801	-0.980317	-0.980317	-0.980317	-0.980317	-0.443699	-0.306747
Kif6	2.0305	1.22694	0.660883	1.25881	-0.647141	-0.647141	-0.647141	-0.647141	-0.647141	-0.647141	-0.647141	-0.647141
Pot1b	2.17664	-0.231616	-0.67405	0.532638	-0.0766429	-0.642813	1.19816	0.380593	-0.192716	0.124238	-1.13457	-1.45986
Rfx2	2.09124	1.23311	-0.843339	-0.843339	0.429472	0.674247	-0.843339	-0.843339	-0.843339	-0.843339	0.309059	0.322904
Ndufv2	1.89131	-0.33078	0.458917	0.978758	0.469032	0.0594977	-0.612946	0.166225	-1.65339	-1.65339	0.00168102	0.225087
Fam98a	1.47925	1.14595	-0.929323	-0.929323	0.640032	0.650459	-0.929323	-0.929323	-0.929323	-0.929323	1.06015	0.60009
Thumpd2	1.91969	1.75372	-0.427399	-0.292781	0.49638	0.511359	-1.13888	-1.13888	-0.231025	-0.74562	-0.282749	-0.423815
Fzd8	1.94627	1.36733	-0.939753	-0.0292353	0.825691	0.765239	-0.247536	-0.665949	-0.285183	-0.661376	-1.12053	-0.954976
Ss18	1.31418	-0.300191	1.24459	1.31296	-0.0475347	-0.619867	-1.40422	-1.40422	-0.400045	-0.858869	0.529111	0.634105
Dsg3	1.77707	1.05081	0.0844635	0.425315	0.57481	0.488728	-1.2061	-1.2061	-1.2061	-1.2061	0.0214701	0.401725
Myo7b	1.76461	0.865724	0.754651	1.10981	-0.884988	-0.884988	-0.884988	-0.884988	-0.884988	-0.884988	0.0176581	0.797473
Map3k2	1.69047	1.4667	-0.865665	-0.865665	-0.865665	-0.865665	0.851615	0.833183	-0.865665	-0.865665	0.0939969	0.258027
Gypc	1.70875	0.992889	-1.50691	-1.50691	-0.272693	-0.629783	0.89526	0.625154	-0.162913	0.656136	-0.16153	-0.637454
Arhgap26	1.30939	-0.59095	0.0689532	0.181722	1.10573	0.9584	-1.78631	-1.78631	0.00178227	-0.243725	0.316795	0.464522
Kctd16	1.33573	-0.237336	0.696097	0.749934	1.16275	0.580077	-1.21684	-1.21684	-1.21684	-1.21684	-0.118004	0.698102
Tcerg1	1.9691	-0.623122	0.365614	0.45123	1.32202	0.566987	-0.461558	-0.676103	-1.30112	-1.30112	-0.490054	0.178128
Spink5	1.70298	0.644891	-1.15603	-1.15603	0.593424	0.139394	-1.15603	-1.15603	1.27398	0.523624	-0.263671	0.00947934
Fem1c	1.36108	0.752978	0.907323	0.817021	0.772658	0.373468	-1.26008	-1.26008	-1.26008	-1.26008	0.0441449	0.0116295
Lvrn	1.83603	0.854598	-0.886795	-0.886795	0.907198	1.02997	-0.886795	-0.886795	-0.886795	-0.886795	0.178775	0.514196
Slc12a2	1.25487	0.215688	-0.280459	0.419497	1.10241	0.701379	-1.64374	-1.64374	-0.412393	-1.00039	0.727953	0.558922
Slc27a6	1.63194	-0.00569181	-0.42809	0.149529	1.48052	1.04983	-1.08689	-1.08689	-1.08689	-1.08689	0.261616	0.207925
Pmaip1	2.0308	1.48458	-1.83094	-0.618424	-0.245063	-0.406695	0.500799	-0.558944	0.132585	-0.346873	-0.0860201	-0.055807
Mc4r	2.1987	1.15972	-0.753093	-0.461602	0.115101	0.0699744	-0.833291	-0.30868	0.0449543	0.930498	-0.964488	-1.19778
Dcc	1.7751	1.46049	-0.3654	0.216217	0.879605	0.307044	-1.18758	-1.04969	0.34018	-0.47424	-1.00845	-0.893282
Setbp1	2.54321	0.617065	0.0103275	1.07937	0.170292	-0.473462	-0.760048	-0.682643	-0.478275	-0.575655	-0.922126	-0.528065
Hsbp1l1	2.51172	1.52324	-0.539532	-0.539532	-0.539532	-0.539532	-0.539532	-0.539532	-0.539532	-0.539532	0.103954	0.177344
Nfatc1	1.51144	0.974029	-0.411585	-0.597777	0.509329	0.770321	-1.11258	-1.11258	-1.11258	-1.11258	0.837862	0.856699
Cpt1a	1.45607	0.152142	-0.180503	-0.567979	1.03681	1.41226	0.537441	0.160337	-1.51365	-1.51365	-0.656619	-0.32266
Aldh3b3	1.94376	0.548974	-0.847877	-0.847877	0.939587	1.2623	-0.847877	-0.847877	-0.847877	-0.847877	0.0323668	0.360278
Rbm4b	2.21675	0.793773	1.46776	0.479144	-0.619679	-0.619679	-0.619679	-0.619679	-0.619679	-0.619679	-0.619679	-0.619679
Kcnk4	2.06369	0.680045	0.850866	0.10838	-0.101945	0.618309	-1.12703	-1.12703	-1.12703	-1.12703	0.0265103	0.262271
Slc22a8	1.1514	-0.149039	0.0686213	-0.467031	0.384224	-0.099025	-1.8916	-1.8916	0.850076	0.672023	0.695126	0.676822
Ahnak	2.09738	0.141744	0.157477	0.444026	0.599851	0.123519	-1.15856	-1.15856	-1.15856	-1.15856	0.390064	0.680179
Ms4a14	2.15214	0.713601	-0.848487	-0.848487	0.876344	0.178604	-0.848487	-0.848487	-0.848487	-0.848487	0.750794	0.419441
Olfr1454	2.57314	0.250527	0.14267	0.790322	-0.420105	-0.121536	0.208449	-0.145703	-1.26162	-0.1369	-1.07947	-0.799774
Rfk	1.99531	1.06843	0.320442	0.714073	-0.166474	-0.550358	-1.36338	-1.36338	0.0771845	0.585472	-0.659943	-0.657375
Aldh1a1	1.4158	0.0979939	0.545377	0.816638	1.20005	0.929003	-1.52549	-1.52549	-0.241827	-0.546814	-0.464785	-0.700469
Cemip2	2.15574	0.341916	0.219305	0.338194	-0.108385	-0.324131	-0.666579	-1.16777	1.06746	0.442735	-1.44215	-0.856334
Tmem252	1.64238	0.413931	-1.14627	-1.14627	-0.184258	-0.2959	-1.14627	-1.14627	1.31707	0.657147	0.678886	0.355821
Prkg1	1.38783	0.444499	1.10838	0.642806	-0.305765	0.144153	-1.22611	-1.22611	-1.22611	-1.22611	0.80462	0.677917
Kif20b	2.96709	0.856812	-0.382391	-0.382391	-0.382391	-0.382391	-0.382391	-0.382391	-0.382391	-0.382391	-0.382391	-0.382391
Cyp2c50	2.21222	-0.341492	-0.36412	-1.09531	1.41066	0.0189359	0.5716	0.268857	-0.454421	-0.223459	-1.04895	-0.954522
Nudt5	2.10941	0.586778	0.644822	1.25088	-0.831332	-0.831332	-0.831332	-0.831332	-0.831332	-0.831332	0.213183	0.182924
Stam	2.24041	0.096888	-0.795795	-0.795795	0.495624	1.14183	-0.795795	-0.795795	-0.795795	-0.795795	0.0114242	0.788597
Arhgap21	1.86618	1.16422	0.328534	1.11687	-0.0356809	-0.747887	-1.12184	-1.32533	-0.0295992	-0.583079	-0.903642	0.271258
Apbb1ip	2.11737	0.998253	0.560459	0.619411	-0.241398	-0.341604	-1.05756	-1.05756	-1.05756	-1.05756	0.399875	0.117869
Fam163b	2.04294	0.749966	0.0730612	-0.499563	0.383853	0.13476	-1.45859	-1.45859	0.545481	0.639395	-0.906364	-0.246343
Cfap77	2.06334	1.01592	-1.14667	-1.14667	0.265528	0.434925	-1.14667	-1.14667	0.296774	0.0859243	0.266999	0.157254
Wdr34	2.19892	0.72653	0.0389983	0.533406	0.499712	0.674785	-1.06662	-1.06662	-1.06662	-1.06662	-0.123226	-0.28264
Pdcl	1.36516	0.98095	-1.22598	-1.22598	0.647237	0.385752	-1.22598	-1.22598	0.0319183	1.22433	-0.0362356	0.304812
Nr6a1	1.54326	0.685632	-0.288485	-0.279893	-0.336721	-0.912571	-1.54783	-1.54783	0.443352	0.276151	0.831377	1.13356
Arpc5l	1.81794	-0.0330564	0.627755	1.75835	-0.147842	-0.203094	-1.36314	-1.36314	-0.0285295	-0.231489	-0.532541	-0.301224
Fmnl2	1.36816	0.0174132	0.629265	1.34785	0.596102	0.164049	-1.23959	-1.23959	-1.23959	-1.23959	0.55471	0.280817
Fap	1.89533	1.4779	-0.459207	0.568951	-0.979475	-1.11256	0.414812	-0.988458	0.125523	0.504612	-0.612395	-0.83503
Ifih1	1.65013	1.48113	-0.669435	-0.669435	1.22305	1.00117	-0.669435	-0.669435	-0.669435	-0.669435	-0.669435	-0.669435
Scn9a	2.00166	1.73437	-0.625744	-0.625744	-0.625744	-0.625744	-0.625744	-0.625744	-0.625744	-0.625744	0.482456	0.787462
Dcaf17	2.13758	1.3355	0.398627	0.38275	0.430634	-0.156431	-0.994044	-0.994044	-0.994044	-0.994044	-0.391881	-0.160611
Rbm45	2.53414	1.13609	-0.571412	-0.571412	-0.571412	-0.571412	-0.571412	-0.571412	-0.571412	-0.571412	0.0835244	0.817548
Fkbp7	2.30326	1.9675	-0.427076	-0.427076	-0.427076	-0.427076	-0.427076	-0.427076	-0.427076	-0.427076	-0.427076	-0.427076
Pde1a	2.25914	0.848517	-0.428809	-0.164661	-0.513397	-1.00569	-1.06593	-1.18471	0.412655	-0.414724	0.535287	0.722329
Olfr1039	1.6071	0.962773	0.413704	1.35977	-0.901858	-0.901858	-0.901858	-0.901858	-0.901858	-0.901858	0.433956	0.633841
Olfr1042	1.14047	1.08827	-1.29583	-1.29583	0.758996	0.101506	0.675271	0.248759	0.654078	0.515964	-1.29583	-1.29583
Olfr1048	1.9347	1.13377	0.269799	-0.827037	-0.827037	-0.827037	-0.827037	-0.827037	-0.827037	1.32263	0.153151	0.148174
Olfr1076	1.83366	1.05284	-0.852863	-0.852863	0.5294	1.34813	-0.852863	-0.852863	-0.852863	-0.852863	0.127144	0.226005
Olfr1135	1.92535	1.51479	-0.64789	-0.64789	-0.64789	-0.64789	-0.64789	-0.64789	-0.64789	-0.64789	1.11783	0.625145
Olfr1204	1.21146	0.811861	-1.23624	-1.23624	0.929491	0.775176	-1.23624	-1.23624	0.744789	0.757963	0.107303	-0.393105
Olfr1238	1.81278	1.14331	-1.16872	-1.16872	0.294029	0.366419	0.808465	0.0159174	-1.16872	-1.16872	0.260314	-0.0263404
Mtch2	2.37407	0.9386	-0.792651	-0.792651	-0.792651	-0.792651	-0.792651	-0.792651	0.641402	0.166221	0.128058	0.507554
Prrg4	2.16616	0.935445	0.527242	1.40825	-0.629637	-0.629637	-0.629637	-0.629637	-0.629637	-0.629637	-0.629637	-0.629637
Kcna4	1.68612	1.27259	-0.945886	-0.784664	0.679588	0.521131	-1.14909	-1.61573	0.402309	-0.290543	0.325776	-0.101602
Slc5a12	1.91691	1.33017	0.176977	0.712406	-0.861876	-0.861876	-0.861876	-0.861876	-0.861876	-0.861876	0.405852	0.62894
Ano3	1.40463	0.759858	-0.580519	0.621826	1.02074	0.497726	0.123185	-0.869104	0.249536	0.115415	-1.64534	-1.69796
Olfr1276	1.86195	0.855883	-0.656547	-0.656547	-0.656547	-0.656547	-0.656547	-0.656547	-0.656547	-0.656547	1.0025	1.53204
Olfr1283	1.20393	0.928431	-0.335299	-0.550308	-1.83662	-1.83662	0.129606	0.0879664	0.185166	0.576749	0.933976	0.513018
Katnbl1	1.92528	1.011	-0.890391	-0.890391	0.77114	0.533554	-0.890391	-0.890391	0.4312	0.670168	-0.890391	-0.890391
Tmco5b	2.29709	0.209154	-0.742326	-0.742326	-0.742326	-0.742326	-0.742326	-0.742326	0.618661	1.40926	-0.0141605	-0.0660572
Fmn1	2.18745	0.0969007	-0.999885	-0.999885	0.474311	0.176278	-0.999885	-0.999885	1.29252	0.336861	-0.341418	-0.223362
Gm14137	1.92212	1.06027	-0.86426	-0.86426	0.681219	0.726753	-0.86426	-0.86426	-0.86426	-0.86426	-0.044675	0.83987
Ccndbp1	1.97589	0.830193	-1.12275	0.664042	0.806917	0.739003	0.212179	-0.756032	-0.8078	-0.875183	-0.628017	-1.03844
Astl	1.74144	0.688976	-0.87626	-0.87626	-0.87626	-0.87626	-0.87626	-0.87626	1.47745	0.702112	0.334265	0.313316
Zc3h6	1.14506	0.379106	0.880081	0.781883	0.530535	0.384176	-1.32017	-1.32017	-1.32017	-1.32017	0.412827	0.767017
Lzts3	2.01852	1.89904	-0.60219	-0.60219	-0.60219	-0.60219	-0.60219	-0.60219	-0.60219	-0.60219	0.368748	0.531208
Rnf24	2.05444	0.92916	0.56801	1.17047	-0.330915	-0.92247	-0.504752	-1.33449	-0.201672	-0.0045118	-1.00633	-0.416937
Plcb1	1.32211	0.802473	-0.339263	0.484871	0.71105	0.77502	-1.25786	-1.25786	-1.25786	-1.25786	0.707549	0.567615
Jag1	1.80306	0.375843	-0.274624	-0.405293	0.384378	0.351998	-1.34074	-1.7637	1.43458	-0.159981	-0.0970878	-0.308439
Ndufaf5	1.47976	0.16529	1.38785	0.965873	0.796525	0.0595399	-1.12678	-1.12678	-1.12678	-1.12678	-0.444978	0.0972417
Rrbp1	1.20456	0.00457503	0.180164	0.464013	0.0528032	-0.274535	-1.93839	-1.93839	0.504921	0.0562519	0.969003	0.715028
Myh7b	1.95493	1.30834	-0.825673	-0.825673	1.06486	0.235371	-0.825673	-0.825673	-0.825673	-0.825673	-0.0397646	0.430303
Fer1l4	1.57927	1.45175	-0.665136	-0.665136	1.48918	0.800885	-0.665136	-0.665136	-0.665136	-0.665136	-0.665136	-0.665136
Sla2	1.52363	0.934058	0.0832281	0.758785	-0.226075	0.0618547	-1.2011	-1.2011	-1.2011	-1.2011	0.782871	0.88603
Birc7	1.99858	0.0661495	0.740031	1.41084	0.208821	0.0345785	-1.03941	-1.03941	-1.03941	-1.03941	-0.311145	0.00978812
Bhlhe22	1.61125	1.45495	-0.786911	-0.561729	1.19311	0.825656	-1.17398	-1.17398	-0.399172	-0.386723	-0.310181	-0.29229
Cyp7b1	1.99965	-0.0109178	0.715668	1.03441	0.348899	0.465795	-0.90749	-1.4423	-1.09158	-0.971124	-0.197164	0.0561576
Hps3	1.48507	0.242712	-1.2239	-1.2239	1.17802	0.231923	-1.2239	-1.2239	1.02572	0.453669	0.192661	0.0858361
Kcnmb3	1.70894	1.33552	-0.670444	-0.670444	-0.670444	-0.670444	-0.670444	-0.670444	-0.670444	-0.670444	1.08583	1.23326
Spata5	2.553	-0.598793	0.562047	0.0919142	0.583445	-0.182214	-0.929254	-1.05338	-0.171661	-1.15172	0.310559	-0.0139391
Slc25a31	2.04612	0.226577	0.796832	0.653778	0.950143	0.160325	-1.0666	-1.0666	-1.0666	-1.0666	-0.456488	-0.110887
Cog6	1.28447	0.604606	0.441639	0.100899	1.09304	0.392511	-1.29009	-1.29009	-1.29009	-1.29009	0.606981	0.636228
Ccnl1	2.53377	0.40817	-0.874762	-0.887606	1.06871	0.244363	-0.434943	-0.790126	-0.192476	-0.888497	-0.0697039	-0.116907
Iqschfp	1.24934	1.04808	-0.6873	0.270768	0.825143	0.530116	-1.16067	-1.16067	-1.16067	-1.16067	0.22609	1.18043
Glrb	1.57994	0.57738	0.00671237	0.750526	0.586077	1.06425	-1.17642	-1.17642	-1.17642	-1.17642	-0.470558	0.611338
Pdgfc	1.894	1.47884	-0.137514	0.595559	0.412567	-0.213313	-1.37082	-1.37082	-0.300647	-0.834485	-0.276242	0.122886
Ctso	1.57037	1.27236	-1.10449	-1.10449	0.588719	-0.123446	0.832133	0.871216	-1.10449	-1.10449	-0.144861	-0.44852
Rbm46	2.73247	0.861182	-1.11381	0.23006	0.18646	-0.0996102	-0.649377	-0.644028	-0.238187	-0.289976	-0.510377	-0.464808
S100a9	1.61128	1.24183	-0.673973	-0.673973	1.32069	1.21798	-0.673973	-0.673973	-0.673973	-0.673973	-0.673973	-0.673973
Lce1i	1.46001	1.41137	-0.915772	-0.915772	0.933312	0.460739	-0.915772	-0.915772	-0.915772	-0.915772	0.560961	0.668246
Hsd3b5	1.51155	0.99809	-2.02942	0.218702	0.980855	0.180002	0.135597	-0.733892	-0.94461	0.689456	-0.250957	-0.755372
Wars2	2.3878	0.91363	-0.756427	-0.756427	0.990958	0.185783	-0.756427	-0.756427	-0.756427	-0.756427	0.108478	-0.0480883
Gdap2	1.5284	0.550821	-0.652761	-0.104365	0.771285	0.839957	-1.30876	-1.30876	0.693098	0.922586	-0.948318	-0.983178
Fndc7	1.08468	-0.0264376	0.18617	0.841515	1.04578	-0.108278	-1.23622	-1.23622	-1.23622	-1.23622	0.872227	1.04921
Plppr4	1.24572	0.29278	-1.82652	-1.82652	-0.275419	-0.584147	0.174023	0.300632	0.443588	0.0929121	0.880603	1.08235
Tmem56	2.53143	0.592868	-0.883063	-0.211946	0.0188161	-0.866336	-1.00102	-0.0498326	0.428829	-1.12088	0.457385	0.103749
F3	2.19015	0.249324	0.739277	0.345418	0.949327	0.0620606	-1.05003	-1.05003	-1.05003	-1.05003	-0.39541	0.0599676
Tacr3	1.92268	0.981208	-0.716691	-0.611159	1.19678	0.619586	-0.951287	-1.50674	-0.321701	-0.593438	-0.065065	0.0458175
Cenpe	1.7707	0.750057	-1.39951	-1.05888	0.740595	0.68173	1.12931	-0.0116982	-0.853149	-0.478143	-0.344596	-0.926415
Lamtor3	1.67228	0.198861	0.825679	1.10877	1.0197	-0.0271439	-1.41201	-1.41201	-0.464384	-0.909225	-0.267892	-0.332614
Unc5c	1.72821	1.29169	0.147069	0.33988	0.237915	-0.107632	-1.56529	-1.59679	0.395022	-0.948422	0.240449	-0.162109
Lyn	2.12242	1.34363	-0.64091	-0.64091	0.940245	0.720985	-0.64091	-0.64091	-0.64091	-0.64091	-0.64091	-0.64091
Usp45	1.69748	0.780099	1.0767	0.504792	0.346235	0.184887	-1.21418	-1.21418	-1.21418	-1.21418	0.201738	0.0647967
Pax5	1.83648	0.84768	-0.882049	-0.882049	0.618042	1.07913	-0.882049	-0.882049	-0.882049	-0.882049	0.0817893	0.829171
Dcaf10	1.13052	-1.33949	1.09671	1.06075	0.877954	0.612186	-1.04632	-1.58676	0.488558	-0.584764	-0.423008	-0.286313
Elp1	1.78033	1.17416	1.02194	1.06351	-0.841832	-0.841832	-0.841832	-0.841832	-0.841832	-0.841832	-0.104508	0.115563
Aldoart1	1.49744	0.543059	-1.18869	-1.18869	0.855311	0.162245	-1.18869	-1.18869	1.20834	0.746663	-0.160765	-0.0975228
Haus6	1.9091	0.978067	-0.650602	-0.650602	-0.650602	-0.650602	-0.650602	-0.650602	-0.650602	-0.650602	0.754647	1.563
Slc35d1	2.44401	1.3806	-0.585648	-0.585648	-0.585648	-0.585648	-0.585648	-0.585648	-0.585648	-0.585648	0.37275	0.487828
Cyp4a29	1.63697	0.127101	0.911425	1.096	0.509367	0.72791	-1.15929	-1.15929	-1.15929	-1.15929	-0.0477491	-0.323868
Akr1a1	2.01588	0.999428	-0.874061	-0.874061	0.775689	0.639642	-0.874061	-0.874061	-0.874061	-0.874061	0.482867	0.330857
Zmpste24	1.60922	0.421759	0.670604	0.969766	-1.21446	-1.21446	-1.21446	-1.21446	0.577466	0.687274	0.219584	-0.297835
Gm12887	2.17295	1.24904	-0.784372	-0.784372	0.685804	0.737629	-0.784372	-0.784372	-0.784372	-0.784372	-0.0332766	-0.105919
Yars	1.33019	-0.252982	0.194139	0.400115	0.842712	0.152235	-1.6981	-1.6981	0.806342	1.05912	-0.407222	-0.728453
Stmn1	1.25932	0.591099	-0.134977	0.338996	0.630846	0.848342	-1.65701	-1.65701	0.784518	0.620918	-0.836967	-0.788074
Rap1gap	2.07113	1.08196	-0.878773	-0.878773	0.285212	0.0288828	-0.878773	-0.878773	-0.715785	-0.7869	0.64318	0.907408
Lrrc38	2.09964	0.833104	-0.64749	-0.64749	-0.64749	-0.64749	-0.64749	-0.64749	-0.64749	-0.64749	1.22006	1.02712
Pramel5	1.57702	1.05543	-1.17191	-0.796252	0.442359	-0.56209	-0.573508	-1.08653	1.5217	0.678646	-0.597203	-0.48766
Zfp992	1.36924	-0.530458	-1.88929	-0.795451	1.20351	-0.666096	1.05649	0.258824	-0.442649	-0.203414	-0.430255	1.06956
Casz1	1.98518	0.826283	-0.850527	-0.850527	1.11938	0.506726	-0.850527	-0.850527	-0.850527	-0.850527	-0.0574873	0.723074
Hes3	1.64274	-0.153326	-1.63206	-1.63206	0.0677684	0.570186	1.49927	-0.0347991	0.156395	-0.329518	-0.414172	0.259574
Dffb	2.45969	0.592957	-0.727587	-0.727587	1.17066	0.1081	-0.727587	-0.727587	-0.727587	-0.727587	-0.123153	0.157271
Tmem52	1.52322	0.539938	0.182202	1.51047	0.321864	0.375739	-1.20033	-1.20033	-1.20033	-1.20033	0.123657	0.224242
Tex47	1.43076	0.933228	-0.274096	-0.0859625	0.912174	0.487872	-1.77938	-1.77938	-0.0565006	-0.546196	0.313151	0.444327
Gm5861	1.54907	1.3236	-0.925202	-0.968521	0.533702	0.853684	-1.12432	-1.30454	0.814989	-0.501617	0.127165	-0.378
4930572O03Rik	1.1983	0.480829	-1.13784	-0.634479	0.956759	0.658699	-0.0345637	-0.117636	1.19137	0.418346	-1.14536	-1.83442
Gnat3	1.72299	0.48137	-0.594958	0.303607	0.440345	-0.170904	-1.73577	-1.73577	0.832652	0.51078	0.245657	-0.300001
Gm7347	2.43044	0.205963	-0.181358	0.235689	0.924213	0.367394	-0.000559652	-0.0325489	-0.859502	-1.20623	-0.988544	-0.894951
Fosl2	2.15863	2.12299	-0.428162	-0.428162	-0.428162	-0.428162	-0.428162	-0.428162	-0.428162	-0.428162	-0.428162	-0.428162
Msx1	1.79541	0.494699	0.784359	0.754082	0.770917	0.537964	-1.14979	-1.14979	-1.14979	-1.14979	-0.144168	-0.394093
Cckar	1.78578	0.461177	0.650252	0.386451	0.598101	0.392495	-1.24922	-1.24922	-1.24922	-1.24922	0.286923	0.435692
Nipal1	1.90087	0.666053	-0.26132	0.180552	-0.479043	0.59373	-1.45092	-1.45092	0.975919	0.569006	-0.619309	-0.624621
Tec	1.69856	-0.00571054	-0.2521	0.807966	-0.953404	0.496591	1.53777	-1.46034	0.125729	-0.818541	-1.01703	-0.159482
Nmu	1.70451	0.200279	0.139638	0.169883	1.24439	1.24199	-1.08348	-1.08348	-1.08348	-1.08348	0.0924502	-0.459205
Tmprss11c	1.26217	1.08768	0.196992	0.958207	0.267678	-0.228959	-1.23933	-1.23933	-1.23933	-1.23933	0.71059	0.702962
Tmprss11g	2.00732	1.9216	-0.601124	-0.601124	-0.601124	-0.601124	0.445905	0.434169	-0.601124	-0.601124	-0.601124	-0.601124
Btc	1.92779	-0.131426	-1.12696	-1.12696	0.84865	-0.302796	-1.12696	-1.12696	0.391848	0.872501	0.287192	0.614063
Uso1	1.73142	0.846825	0.610242	1.13693	0.489417	0.0738682	-1.15353	-1.15353	-1.15353	-1.15353	-0.0511023	-0.223484
Ccng2	1.98308	0.141653	0.76238	0.25754	0.750592	0.47378	-1.29974	-1.73657	-0.880841	-0.344533	0.00362713	-0.110977
Hnrnpd	1.98397	0.40538	0.754875	1.53695	-0.810487	-0.810487	-0.810487	-0.810487	-0.810487	-0.810487	0.0215095	0.160239
Mapk10	1.76042	0.726862	0.103846	1.05235	0.115044	-0.00504319	-1.6303	-1.6303	-0.253911	0.61698	-0.666616	-0.189338
Lpcat2b	2.60765	1.56747	-0.417513	-0.417513	-0.417513	-0.417513	-0.417513	-0.417513	-0.417513	-0.417513	-0.417513	-0.417513
Dr1	1.70256	0.748677	-0.919976	-0.919976	1.0329	0.753656	-0.919976	-0.919976	-0.919976	-0.919976	0.695352	0.586704
Tmem119	1.79844	0.589508	-0.271886	0.569131	1.3061	0.826289	-1.05448	-1.05448	-1.05448	-1.05448	-0.344979	-0.25466
Slc8b1	2.26199	-0.680265	0.246455	-0.0669293	-1.11843	-0.199466	0.109584	0.905234	0.591325	0.29433	-1.01345	-1.33038
Trafd1	1.61567	0.723572	0.417576	1.37614	0.614063	-0.0970509	-1.45939	-1.45939	-0.62962	-0.7866	-0.36604	0.0510681
Atxn2	1.50921	-0.351927	0.697901	0.324254	1.40854	0.706193	-1.16601	-1.16601	-1.16601	-1.16601	0.0931836	0.276679
P2rx7	1.15715	0.925913	-0.305552	0.923482	-1.17367	-1.17367	-1.17367	-1.17367	0.997972	1.14371	-0.20161	0.0535999
Hcar2	1.93641	1.59162	-0.646434	-0.646434	-0.646434	-0.646434	-0.646434	-0.646434	-0.646434	-0.646434	0.930339	0.713102
Cdk2ap1	1.68237	0.130465	1.39333	0.613646	0.314386	0.600891	-1.15777	-1.15777	-1.15777	-1.15777	-0.114029	0.0100105
Zfp68	2.27179	2.00291	-0.42747	-0.42747	-0.42747	-0.42747	-0.42747	-0.42747	-0.42747	-0.42747	-0.42747	-0.42747
Fam20c	1.75178	0.842171	-0.836079	-0.836079	-0.836079	-0.836079	-0.836079	-0.836079	1.26168	1.18528	-0.136387	0.111952
Uncx	1.67622	0.586558	-1.13076	-1.13076	0.973446	1.10459	-1.13076	-1.13076	0.336429	0.48753	-0.260509	-0.381237
Snx8	0.844581	0.767231	0.654015	0.414658	-1.34496	-1.34496	-1.34496	-1.34496	0.656116	0.823708	0.680816	0.538712
Zscan25	2.03754	0.667172	-0.866823	-0.866823	0.877793	0.212877	-0.866823	-0.866823	-0.866823	-0.866823	0.489022	0.916532
Wdr95	2.13485	1.46493	-0.632405	-0.632405	-0.632405	-0.632405	-0.632405	-0.632405	-0.632405	-0.632405	0.603438	0.85602
Sdhaf3	1.71705	-0.784598	-0.595732	-0.170719	1.55206	-0.411386	-1.0001	-1.39866	-0.467942	0.159815	1.08267	0.317549
Ptprz1	2.05494	-0.214266	0.619401	0.312994	1.18246	0.199226	-1.43101	-1.43101	-0.212818	-0.607481	0.0722532	-0.544693
Fezf1	2.23768	1.36174	-0.625959	-0.625959	-0.625959	-0.625959	-0.625959	-0.625959	-0.625959	-0.625959	0.625802	0.782453
Hyal6	1.57142	1.22341	-0.896191	-0.896191	1.20097	0.704818	-0.896191	-0.896191	-0.896191	-0.896191	0.491546	0.184972
Dennd2a	1.40692	0.891236	0.679392	0.141935	0.108552	0.456028	-1.27305	-1.27305	-1.27305	-1.27305	0.863477	0.54464
Nobox	2.0004	0.645567	0.587174	0.766427	0.469742	0.494093	-1.12707	-1.12707	-1.12707	-1.12707	-0.227437	-0.227704
Zfp212	1.87305	0.408792	1.0762	1.71674	-0.634347	-0.634347	-0.634347	-0.634347	-0.634347	-0.634347	-0.634347	-0.634347
Igf2bp3	2.17968	0.354226	0.824984	0.215186	0.407355	-0.0592711	-0.306836	-0.404514	-1.57573	-1.57573	0.000385819	-0.0597398
Itprid1	1.33084	0.524835	0.251259	0.439212	0.693616	-0.0452424	-1.24909	-1.24909	-1.24909	-1.24909	0.482631	1.31922
Snca	1.90318	0.644134	-0.0207761	1.11041	0.139614	-0.48827	-1.50054	-1.50054	-0.387321	-0.685619	0.53363	0.252088
Vmn1r39	1.78948	1.73126	-0.646798	-0.646798	-0.646798	-0.646798	-0.646798	-0.646798	-0.646798	-0.646798	1.03471	0.618934
Gng12	1.92633	0.614293	0.191985	0.255787	0.385065	0.449949	-1.2056	-1.2056	-1.2056	-1.2056	0.229281	0.769704
St3gal5	1.50345	1.26961	-0.936384	-0.243766	-0.655701	-0.725744	1.06049	-0.837079	1.12404	0.422087	-0.93704	-1.04396
Reg3g	1.49147	0.590455	-1.87664	-1.35017	1.16585	0.268654	-0.327114	-0.887464	0.646985	-0.223375	-0.0339651	0.535303
Rab43	1.561	0.790667	0.638533	1.14782	0.124525	0.545367	-1.20626	-1.20626	-1.20626	-1.20626	-0.190903	0.208047
Ccdc174	1.74015	0.419697	0.789656	0.865939	0.933711	0.400973	-1.14237	-1.14237	-1.14237	-1.14237	-0.266581	-0.314056
Arl6ip5	1.4865	1.33123	0.0411315	0.873487	0.191156	0.960343	-1.14381	-1.14381	-1.14381	-1.14381	-0.237516	-0.0711073
Eif4e3	2.56649	1.62883	-0.419531	-0.419531	-0.419531	-0.419531	-0.419531	-0.419531	-0.419531	-0.419531	-0.419531	-0.419531
Ntf3	2.64135	1.51514	-0.415649	-0.415649	-0.415649	-0.415649	-0.415649	-0.415649	-0.415649	-0.415649	-0.415649	-0.415649
Tspan9	1.94154	-0.0303005	0.776544	0.780877	0.131607	-0.292347	-0.232771	-0.3841	-1.64257	-1.64257	0.0327493	0.561337
Olr1	2.15485	0.657335	0.167416	0.397849	0.639799	0.612513	-1.11087	-1.11087	-1.11087	-1.11087	-0.104285	-0.0820009
Prpmp5	1.78254	1.00844	0.34249	0.0557837	-1.19402	-1.19402	-1.19402	-1.19402	0.88594	0.382707	0.174297	0.143896
Tas2r120	2.39429	1.85954	-0.425383	-0.425383	-0.425383	-0.425383	-0.425383	-0.425383	-0.425383	-0.425383	-0.425383	-0.425383
Tas2r136	1.55772	1.37565	0.477791	0.405484	-0.885834	-0.885834	-0.885834	-0.885834	-0.885834	-0.885834	1.22753	0.270832
Tas2r131	1.3007	1.28804	-1.4505	-1.4505	0.144623	0.703781	0.0817024	-0.0468782	0.753871	0.630647	-1.1159	-0.839591
Sspn	2.40493	1.49725	-0.409649	0.43555	-0.0890631	-0.609557	-0.494816	-0.430054	-0.225281	-0.748438	-1.05992	-0.270949
Vmn1r71	2.17654	2.1047	-0.428124	-0.428124	-0.428124	-0.428124	-0.428124	-0.428124	-0.428124	-0.428124	-0.428124	-0.428124
Sult2a3	1.68752	1.23922	-0.654696	-0.654696	-0.654696	-0.654696	-0.654696	-0.654696	-0.654696	-0.654696	1.66415	0.646672
Cyp2b19	1.19676	0.928226	-0.949369	-0.949369	0.923206	1.15068	-0.949369	-0.949369	-0.949369	-0.949369	0.770518	0.726828
Catsperg2	1.3491	0.400497	-0.122918	0.113698	1.33094	0.46087	-0.798092	-1.23992	-1.40011	-1.34325	1.00438	0.244795
Scgb2b26	1.56745	1.21728	-0.673649	-0.673649	-0.673649	-0.673649	-0.673649	-0.673649	-0.673649	-0.673649	1.16207	1.44239
Vmn2r57	1.39621	0.786453	-0.926672	-0.926672	1.27003	1.05435	-0.926672	-0.926672	-0.926672	-0.926672	0.507337	0.545647
Herc2	1.74106	0.0268594	0.538043	1.18467	0.0673093	0.219121	0.306615	-0.375657	-1.70076	-1.70076	-0.431859	0.125356
Nr2f2	1.81313	1.01928	-0.820955	0.526947	0.989728	0.150236	0.0446673	-1.09783	0.463985	-0.754766	-1.12898	-1.20544
Cfap161	1.92873	-0.118237	-0.720533	0.509736	0.580601	0.373869	-0.664481	-1.85013	-1.21868	0.065999	0.421416	0.691716
Dlg2	1.78511	1.3006	-0.839355	-0.781822	0.54595	0.284018	-1.00426	-1.00426	-0.764324	-0.920315	0.721115	0.677552
Gab2	2.37988	0.542006	-0.256163	-0.393862	0.64975	0.669102	-0.267168	-0.228524	-1.37235	-1.37235	-0.183551	-0.166769
Aamdc	2.211	-0.152822	-0.372125	-0.372502	1.27126	0.778463	-0.931757	-0.931757	-0.931757	-0.931757	0.0238858	0.339865
Clpb	1.54113	-0.171378	-0.00736167	0.65799	0.334136	0.628574	-1.90296	-1.90296	0.0413504	-0.0963673	0.346909	0.530946
Olfr571	1.90257	1.83862	-0.62682	-0.62682	-0.62682	-0.62682	-0.62682	-0.62682	-0.62682	-0.62682	0.485436	0.787939
Olfr635	1.67696	1.22642	-1.112	-1.112	0.553832	0.335158	-1.112	-1.112	0.725162	0.702886	-0.375413	-0.396999
Olfr645	1.28678	0.785697	1.11367	0.288433	0.611611	0.791775	-1.25128	-1.25128	-1.25128	-1.25128	-0.192928	0.320065
Trim30c	1.87682	0.799926	-0.84968	-0.84968	1.48405	0.362087	-0.84968	-0.84968	-0.84968	-0.84968	0.22844	0.346764
Olfr698	2.41566	0.754789	-0.761245	-0.761245	0.933503	0.486392	-0.761245	-0.761245	-0.761245	-0.761245	-0.0809531	0.058085
Syt9	1.53199	0.619922	-1.52285	-1.52285	0.0536584	-0.794715	0.829571	0.981388	-0.454658	-0.748692	0.355547	0.671678
Olfr469	2.14539	1.46484	-0.63217	-0.63217	-0.63217	-0.63217	-0.63217	-0.63217	-0.63217	-0.63217	0.784161	0.662975
Olfr487	1.35661	0.82258	0.189921	0.956538	0.733438	0.471473	-1.28086	-1.28086	-1.28086	-1.28086	0.166846	0.42602
Olfr494	1.96545	0.640539	-1.00043	0.510535	-0.0830135	-0.716334	1.44557	-0.434362	0.317579	-1.01823	-0.493412	-1.1339
Olfr518	1.65491	-0.258267	-0.117886	0.676403	-0.255071	-0.379819	-1.74034	-1.74034	0.960487	0.550435	0.42441	0.225074
Eif3f	1.67723	0.522849	0.743591	0.975326	0.647021	0.351239	-1.19959	-1.19959	-1.19959	-1.19959	-0.287656	0.168766
Zfp143	2.32539	0.154238	-0.46243	0.318185	-0.0276265	-0.711358	-0.772766	-0.58248	1.41892	0.153597	-1.16059	-0.653089
Scnn1b	1.39398	1.19891	0.696295	1.20091	0.604186	0.450615	-0.92415	-0.92415	-0.92415	-0.92415	-0.92415	-0.92415
Phkg2	1.56978	0.354237	0.793221	1.23924	0.664379	0.240503	-1.19809	-1.19809	-1.19809	-1.19809	-0.0667534	-0.00222693
Ate1	1.49045	0.2825	0.215769	0.872346	-0.0939478	0.421791	-1.63882	-1.63882	1.33617	-0.554585	-0.352569	-0.340281
Plekha1	1.43682	0.540714	0.789354	0.633171	0.00158237	-0.616629	-1.75051	-1.75051	0.709726	-0.501168	-0.0829626	0.590418
Gm45618	1.65818	1.31579	-0.87677	-0.87677	1.19683	0.210144	-0.87677	-0.87677	-0.87677	-0.87677	0.29267	0.587012
Ano1	1.33693	1.25725	0.140892	0.172288	0.935981	0.68353	-1.20495	-1.20495	-1.20495	-1.20495	0.587261	-0.294332
Stxbp2	2.1622	0.466755	-0.837456	-0.837456	0.567507	0.80033	-0.837456	-0.837456	-0.837456	-0.837456	0.0622482	0.965698
Fbxo25	1.93234	1.61852	-0.641172	-0.641172	-0.641172	-0.641172	-0.641172	-0.641172	-0.641172	-0.641172	0.552846	1.02566
Myom2	2.15947	1.27223	-0.358054	1.03976	0.0578903	-0.462439	-0.374198	-1.10474	-0.149068	-0.641139	-1.20023	-0.239472
Gm6040	2.2847	1.9885	-0.42732	-0.42732	-0.42732	-0.42732	-0.42732	-0.42732	-0.42732	-0.42732	-0.42732	-0.42732
Gins4	1.58913	1.1834	-0.89917	-0.89917	-0.89917	-0.89917	-0.89917	-0.89917	0.965782	0.766775	0.0534801	0.836443
Chrna6	1.84699	-1.12113	-1.04792	0.442877	0.686858	1.13239	-0.46769	-1.36235	-0.245633	-0.733121	0.0927216	0.776012
Nrg1	1.64899	0.467122	0.0425478	1.38251	0.286615	0.13193	-1.64137	-1.64137	-0.50809	-0.552666	0.0811651	0.302616
Gm19410	1.81374	-0.38678	0.517629	0.258408	0.154688	0.0744612	-1.8144	-1.8144	0.626727	0.447766	-0.0156315	0.137785
Palld	1.37218	0.662434	-0.31391	0.105247	1.21697	0.585018	0.462049	0.331352	-1.72231	-1.72231	-0.567225	-0.409498
Tll1	1.51679	0.741613	-0.432736	-0.96363	0.1596	0.161685	-0.758165	-0.639464	1.43745	1.10488	-1.18957	-1.13845
Nat3	1.29912	0.854678	-1.27223	-1.27223	0.744097	0.62035	-1.27223	-1.27223	0.0426379	0.00841037	0.839042	0.680568
Zfp617	2.12179	1.17144	-0.642121	-0.642121	-0.642121	-0.642121	-0.642121	-0.642121	-0.642121	-0.642121	0.669378	1.17435
Gnao1	1.75073	0.147133	-1.21808	-1.21808	-0.025336	0.504292	-1.21808	-1.21808	0.292566	0.817751	0.762669	0.622514
Cmtm3	2.3616	0.475421	1.02375	0.551365	-0.772856	-0.772856	-0.772856	-0.772856	-0.772856	-0.772856	-0.230713	0.455713
Ces3a	1.41648	0.828018	-1.19737	-1.19737	0.667762	0.949672	-1.19737	-1.19737	0.412127	0.94248	-0.0184783	-0.408574
Elmo3	2.32926	0.373773	0.747216	0.966345	0.0515754	0.32736	-0.799255	-0.799255	-0.799255	-0.799255	-0.799255	-0.799255
Mlycd	1.46422	0.984622	-0.855754	-0.855754	1.3976	1.24007	-0.855754	-0.855754	-0.855754	-0.855754	0.00840076	0.0396148
1190005I06Rik	2.07761	1.00945	-0.859092	-0.859092	0.643771	0.773206	-0.859092	-0.859092	-0.859092	-0.859092	0.246376	0.404136
Sipa1l2	1.2442	0.450464	-1.27091	-1.27091	0.22536	1.04166	0.629689	-0.0668811	-1.27091	-1.27091	0.913575	0.645565
Mbd3l1	1.46359	0.395359	-1.74128	-1.74128	0.421691	0.604756	-0.256929	-0.338319	-0.00703457	-0.254279	0.0975236	1.35619
Muc16	2.12222	1.24482	-0.0721365	0.538103	-0.128884	-0.365803	-1.3718	-1.58751	-0.0682392	-0.254436	-0.147324	0.0909807
Ets1	1.87721	1.57938	0.104621	-0.102002	-0.320376	-0.110053	-0.990029	-0.990029	-0.990029	-0.990029	-0.0299282	0.961271
Olfr958	1.94388	0.969065	-1.11124	-1.11124	0.953786	0.370983	-0.184462	-0.216409	-1.11124	-1.11124	0.426042	0.182068
Rab39	1.739	0.721894	-0.956177	-0.956177	1.4032	1.18458	-0.195422	-0.191	-0.956177	-0.956177	-0.414618	-0.422925
Tspan3	1.72654	1.29697	0.727676	0.87891	0.182241	-0.295572	-1.31416	-1.23777	0.00115147	-1.11233	-0.590622	-0.263039
Skor1	1.47324	1.22316	-0.976956	-0.417006	-0.421641	-1.24401	-0.9785	-1.06588	1.00476	1.03943	-0.157578	0.520979
Filip1	1.93497	0.339451	0.0515967	0.719737	0.185548	0.106979	-0.357024	0.495645	-1.74283	-1.74283	0.255379	-0.24662
Tent5a	2.26112	0.843055	-0.783466	-0.228402	0.681567	0.628602	-1.30895	-1.30895	-0.334883	-0.286552	0.00974203	-0.172878
Mrap2	1.83101	1.13361	-0.802236	-0.802236	1.27843	0.900939	-0.802236	-0.802236	-0.802236	-0.802236	-0.157884	-0.17269
Zbtb38	1.76638	0.43429	0.686549	0.843098	0.83043	0.511313	-1.15755	-1.15755	-1.15755	-1.15755	-0.445379	0.00351557
Anapc13	2.09998	0.070685	1.101	0.923168	0.321299	0.490159	-0.834382	-0.834382	-0.834382	-0.834382	-0.834382	-0.834382
Dnajc13	2.0834	1.10624	-0.638642	-0.638642	-0.638642	-0.638642	-0.638642	-0.638642	-0.638642	-0.638642	1.36628	0.553221
Dock3	1.18434	0.309376	-0.0689501	0.825914	1.1157	-0.524584	0.833841	0.60483	-1.70765	-1.70765	-0.315832	-0.549324
Qrich1	1.35985	-0.0231725	0.995091	1.33644	1.04097	0.0749003	-1.14421	-1.14421	-1.14421	-1.14421	-0.218694	0.0114425
Fbxw14	1.5245	1.25566	-0.88851	-0.88851	0.384372	1.26206	-0.88851	-0.88851	-0.88851	-0.88851	0.778529	0.125931
Dclk3	1.69739	1.05142	-0.670289	-0.670289	-0.670289	-0.670289	-0.670289	-0.670289	-0.670289	-0.670289	1.35079	1.26271
Tgfbr2	1.36711	1.03607	-0.866462	-0.866462	1.32164	1.34062	-0.866462	-0.866462	-0.866462	-0.866462	0.0756264	0.0577143
Csrnp1	1.20787	0.0318902	-0.0779157	0.840154	1.01676	0.263801	-1.75911	-1.75911	0.632829	-0.103758	-0.882043	0.588636
Zfp651	2.64108	1.51556	-0.415664	-0.415664	-0.415664	-0.415664	-0.415664	-0.415664	-0.415664	-0.415664	-0.415664	-0.415664
Zdhhc3	1.96068	0.99335	-0.869551	-0.869551	0.789307	0.542174	-0.869551	-0.869551	-0.869551	-0.869551	0.0909384	0.840851
Gm21637	1.5753	0.689866	-0.621793	-0.436185	1.17429	0.384207	0.0693859	-0.427522	0.911856	-0.195127	-1.53639	-1.58789
Btbd35f17	1.73541	0.0194403	1.34828	1.16633	0.0710918	-0.131266	-0.805835	-0.889338	0.254349	-0.237186	-1.3719	-1.15937
Mycs	1.76935	-0.216994	0.295397	1.31203	0.813459	0.34031	-0.187034	-0.670906	-0.115101	-0.299709	-1.63156	-1.40924
H2al1n	1.88979	0.526088	-0.643141	-0.643141	1.60802	1.12122	-0.643141	-0.643141	-0.643141	-0.643141	-0.643141	-0.643141
Gm4907	2.73047	1.10758	-0.528551	-0.528551	0.137472	0.252884	-0.528551	-0.528551	-0.528551	-0.528551	-0.528551	-0.528551
Gm5169	1.61474	0.904371	0.419144	0.871065	1.122	0.574165	-0.917581	-0.917581	-0.917581	-0.917581	-0.917581	-0.917581
Btbd35f14	1.70433	0.61921	0.783936	1.43103	0.286946	0.311492	-0.697275	-0.837905	-0.393177	-0.822936	-1.14654	-1.23912
Fam122c	2.17562	2.10565	-0.428127	-0.428127	-0.428127	-0.428127	-0.428127	-0.428127	-0.428127	-0.428127	-0.428127	-0.428127
Ctag2	1.76979	0.370737	-1.14431	-0.796539	1.67312	0.489892	-0.598917	-1.2004	0.0303833	-0.1816	-0.84975	0.43759
Cldn34b3	1.58584	-0.562669	0.699221	-0.101378	1.4692	0.744484	-1.47582	-1.47582	-0.195605	-0.6557	-0.272504	0.240745
Dmd	1.27785	0.876283	0.772903	0.8876	0.966835	0.920432	-0.982454	-0.982454	-0.863328	-0.908761	-0.982454	-0.982454
Il1rapl1	2.49969	1.72293	-0.422262	-0.422262	-0.422262	-0.422262	-0.422262	-0.422262	-0.422262	-0.422262	-0.422262	-0.422262
Pola1	1.44481	0.81328	0.554399	0.872731	1.36354	0.479251	-0.921336	-0.921336	-0.921336	-0.921336	-0.921336	-0.921336
Gm732	2.38039	1.87658	-0.425697	-0.425697	-0.425697	-0.425697	-0.425697	-0.425697	-0.425697	-0.425697	-0.425697	-0.425697
Hmgn5	2.43469	0.666646	-1.30531	-1.30531	0.170592	-0.287182	0.511675	0.251759	0.15858	-0.0722974	-0.566214	-0.657625
4921511C20Rik	2.20092	1.36101	-0.624189	-0.624189	0.431188	1.0004	-0.624189	-0.624189	-0.624189	-0.624189	-0.624189	-0.624189
Irs4	1.78922	0.927805	0.511808	1.02295	0.692958	0.485142	-0.904981	-0.904981	-0.904981	-0.904981	-0.904981	-0.904981
Kdm5c	2.31299	1.95636	-0.426935	-0.426935	-0.426935	-0.426935	-0.426935	-0.426935	-0.426935	-0.426935	-0.426935	-0.426935
Foxr2	1.87935	1.2322	-0.657551	-0.657551	0.772803	1.37605	-0.657551	-0.657551	-0.657551	-0.657551	-0.657551	-0.657551
Gemin8	1.96503	1.26222	-0.644947	-0.644947	0.547309	1.38502	-0.644947	-0.644947	-0.644947	-0.644947	-0.644947	-0.644947
Vxn	0.0375391	1.53921	-1.15659	-1.15659	0.0768544	0.528734	-1.15659	-1.15659	1.39031	0.542307	0.819328	-0.307926
Stau2	0.988037	1.45461	-1.359	0.832756	-0.52889	-1.20739	0.871382	-0.718959	0.762149	0.534399	-0.531378	-1.09772
Unc50	1.55353	2.29929	-0.59701	-0.59701	-0.59701	-0.59701	-0.59701	-0.59701	0.567068	0.356195	-0.59701	-0.59701
Casp8	-0.0781994	0.840121	0.673438	0.581655	0.367938	0.489197	-2.05011	-2.05011	0.504807	-0.1857	0.366653	0.540303
Igfbp5	1.35191	1.43038	-0.871401	-0.871401	0.717091	1.4132	-0.871401	-0.871401	-0.871401	-0.871401	0.225302	0.0905202
Scg2	0.583374	2.03404	-1.46462	-0.608743	1.29344	0.270772	-0.543225	-1.34736	-0.142114	-0.30595	0.184436	0.0459556
Nyap2	1.02988	1.75304	-0.597315	1.03029	0.447559	-0.219344	-1.00027	-1.12495	0.260736	0.637312	-1.13881	-1.07814
Asb1	1.11853	1.49602	0.116191	1.07225	0.766743	0.283618	-1.18895	-1.18895	-1.18895	-1.18895	-0.149028	0.0514677
C1ql2	0.964467	2.26167	-0.630359	-0.630359	-0.630359	-0.630359	-0.630359	-0.630359	-0.630359	-0.630359	1.15895	0.657787
Il19	0.842603	1.432	-0.910638	-0.910638	-0.910638	-0.910638	-0.910638	-0.910638	1.33067	1.08158	0.284872	0.492101
Cfhr2	1.03512	1.35225	0.209592	1.15018	-1.24424	-1.24424	-1.24424	-1.24424	0.622984	0.169	0.337416	0.100406
Pdc	0.5389	1.66043	0.494082	0.929284	-0.918319	-0.918319	-0.918319	-0.918319	-0.918319	-0.918319	0.989605	0.897611
Lbr	-0.026674	1.40564	-1.57303	0.691475	-0.150273	0.0591347	0.40371	0.303146	1.26981	0.424375	-1.23491	-1.57241
Capn8	0.516648	1.40306	0.151401	0.641736	-0.894586	-0.894586	-0.894586	-0.894586	-0.894586	-0.894586	1.28044	1.37423
Camk1g	1.26436	1.94497	0.855305	0.735668	-0.844219	-0.844219	-0.844219	-0.844219	-0.844219	-0.844219	0.263591	0.00141595
Gm4981	0.580255	1.51334	-1.89709	-0.977479	-1.0332	-0.385281	0.699242	-0.098804	1.25485	0.686187	-0.165911	-0.176094
Bod1	1.18401	1.5102	-0.23887	0.477414	0.170455	-0.501375	-1.57981	-1.57981	1.25222	-0.136493	-0.374103	-0.183841
Spdl1	0.978022	1.69348	-0.878208	-0.878208	0.322774	0.0771095	-0.878208	-0.878208	-0.878208	-0.878208	1.2054	0.992473
Gabrg2	1.42958	2.12548	-0.496921	0.0718683	0.350137	-0.537436	-0.287015	-0.890046	0.30364	-0.063702	-0.373081	-1.63251
Olfr1390	1.26611	2.78494	-0.405104	-0.405104	-0.405104	-0.405104	-0.405104	-0.405104	-0.405104	-0.405104	-0.405104	-0.405104
Adamts2	1.04177	1.29373	-0.927601	-0.927601	0.971305	0.214941	-0.927601	-0.927601	-0.927601	-0.927601	1.02065	1.02321
Gpx3	1.59901	1.62409	-0.915801	-0.0931663	0.742274	0.0111441	-1.44177	-1.44177	-0.294179	0.379165	-0.0342514	-0.134733
Zfp692	0.196962	1.52144	0.294925	0.551718	-0.874902	-0.874902	-0.874902	-0.874902	1.51454	1.16983	-0.874902	-0.874902
Drg2	0.382591	1.86265	-1.72319	-0.432961	-0.289298	0.0360801	0.574618	0.213241	0.894122	0.655427	-0.789924	-1.38335
Pirt	0.934875	1.48009	0.131526	0.834572	-0.911611	-0.911611	-0.911611	-0.911611	-0.911611	-0.911611	0.879675	1.20893
Ywhae	0.79951	1.50301	0.632147	0.708044	0.803515	0.557345	-1.24727	-1.24727	-1.24727	-1.24727	-0.111349	0.0968698
Cct6b	0.951989	1.86857	0.919951	0.839298	-0.890623	-0.890623	-0.890623	-0.890623	-0.890623	-0.890623	0.395754	0.368172
Mmd	-0.637452	1.87702	0.0954954	0.952197	0.27104	0.466179	0.768311	-0.0915545	0.0847765	-0.910153	-1.05432	-1.82154
Grn	2.0555	2.22349	-0.4279	-0.4279	-0.4279	-0.4279	-0.4279	-0.4279	-0.4279	-0.4279	-0.4279	-0.4279
Axin2	1.93355	2.02729	-0.158065	0.492471	-0.412469	-0.809305	-0.392612	-0.698163	0.0233345	-0.689821	-0.851347	-0.464862
Rad51ap2	1.33047	1.52815	0.192276	0.493554	0.374914	0.64441	-1.21815	-1.21815	-1.21815	-1.21815	-0.0391504	0.347987
Lrfn5	0.994404	1.36783	0.165043	0.774028	0.785723	-0.0459724	-1.18709	-1.20259	-1.11143	-1.21777	1.0775	-0.399678
Prkch	1.19219	1.44148	0.385061	0.980128	-0.660894	-0.290027	-1.55466	-1.55466	-0.354782	-0.601208	0.38182	0.635569
Gphn	1.50708	1.80327	-0.109907	0.761092	-0.545898	-0.993118	-0.328236	-1.14195	0.863094	-0.125576	-0.867025	-0.822829
Samd15	0.804558	1.44162	-1.22403	-1.22403	1.21462	0.220657	-1.22403	-1.22403	0.208233	0.759081	-0.107991	0.355326
Ddx24	1.38039	1.54049	-0.668808	-0.668808	1.52426	0.905322	-0.668808	-0.668808	-0.668808	-0.668808	-0.668808	-0.668808
Serpina3n	-1.49245	1.51718	-0.715776	-0.610155	0.162023	-0.574809	0.449597	0.675705	0.870015	1.46506	-0.606281	-1.14011
Btn1a1	1.19796	2.54262	-1.10377	-0.399561	-0.289675	-0.478425	0.457387	-0.627878	-0.403901	0.0020434	-0.101612	-0.795184
Serpinb6d	-0.81989	1.65165	-0.749466	-1.31472	0.147214	0.413741	1.62693	-0.455103	0.100119	0.831113	-0.197503	-1.23409
Eef1e1	0.286825	1.80182	-0.698919	0.349538	1.22083	0.70936	-0.184039	-1.03987	0.0946403	0.215441	-1.15467	-1.60096
Dtnbp1	1.72497	2.08714	-0.128145	0.796441	-0.378651	-0.564518	-0.284302	-0.388682	-0.383533	-0.900745	-1.03187	-0.548106
Pitx1	0.861709	1.42467	0.697074	1.06394	0.693227	0.904491	-0.940852	-0.940852	-0.940852	-0.940852	-0.940852	-0.940852
Poc5	0.950703	1.42763	0.893996	1.04332	0.156668	-0.0714767	-1.20973	-1.20973	-1.20973	-1.20973	0.527981	-0.0899195
Il31ra	1.15605	2.55857	-0.545185	0.713947	-0.625076	-0.601367	-0.338352	-0.774273	-0.261407	-0.711092	-0.0551633	-0.516656
Gm3020	0.399635	1.9058	0.258291	1.19372	-1.05644	-1.05644	-1.05644	-1.05644	0.889707	0.360951	-0.280669	-0.501685
Gm3005	-0.570497	1.65818	-1.46377	0.0699701	0.575986	-0.189778	1.00503	0.98397	-0.133317	0.553503	-1.31164	-1.17764
Gm5796	0.919244	1.22266	-0.131249	0.866376	1.20483	0.171237	-0.398039	-0.743561	0.110263	0.123295	-1.47512	-1.86994
Gm3173	0.988468	1.50153	-1.41409	-1.12091	0.293328	-0.306135	1.11585	0.728219	0.26104	0.170359	-1.08735	-1.13029
Gm3558	1.12033	1.1342	-1.18617	0.0221782	-0.0618408	0.0723759	0.349873	0.437642	0.726986	0.734003	-1.83425	-1.51533
Fhit	0.962069	2.37156	-1.18304	-0.240439	0.314161	0.505996	-0.257197	0.366287	-1.0936	-0.968046	-0.3562	-0.421554
Synpr	1.2355	1.91371	0.100371	0.202211	0.592103	0.128135	-1.14978	-1.14978	-1.14978	-1.14978	0.129553	0.297527
Samd4	1.39405	1.43551	0.740135	1.43431	-0.723511	-0.756163	-0.904345	-0.904345	-0.904345	-0.904345	-0.053403	0.146458
Zfhx2	1.65389	2.54914	-0.420303	-0.420303	-0.420303	-0.420303	-0.420303	-0.420303	-0.420303	-0.420303	-0.420303	-0.420303
Scel	1.98606	2.08016	-0.564779	-0.564779	-0.564779	-0.564779	-0.564779	-0.564779	-0.564779	-0.564779	0.032946	0.419068
Il7r	1.03384	1.71206	-0.892489	-0.892489	0.700989	1.19737	-0.892489	-0.892489	-0.892489	-0.892489	0.502295	0.208384
Sybu	0.861644	1.51034	-1.25805	-1.25805	0.562386	0.913437	-1.25805	-1.25805	0.389787	-0.00383774	0.509629	0.288794
Myc	1.86767	2.33455	-0.505391	-0.505391	-0.0263994	-0.132701	-0.505391	-0.505391	-0.505391	-0.505391	-0.505391	-0.505391
Cacng2	1.48949	2.08	-0.638932	-0.638932	-0.638932	-0.638932	-0.638932	-0.638932	-0.638932	-0.638932	0.783634	0.758331
Kctd17	1.04402	1.91209	-0.241033	0.0231911	-0.526223	-0.0986801	-1.588	-1.588	0.612713	0.677361	-0.0633966	-0.164052
Cyb5r3	1.00823	1.90633	-0.355036	0.245894	0.224611	0.362093	0.383433	0.336497	-1.63695	-1.63695	-0.491891	-0.346267
Cacnb3	1.46797	2.67063	-0.41386	-0.41386	-0.41386	-0.41386	-0.41386	-0.41386	-0.41386	-0.41386	-0.41386	-0.41386
Amhr2	2.11781	2.16373	-0.428154	-0.428154	-0.428154	-0.428154	-0.428154	-0.428154	-0.428154	-0.428154	-0.428154	-0.428154
Txndc11	-0.302458	2.22195	-0.54357	0.28421	-0.901808	-0.701479	0.215518	-0.262222	1.31383	0.66714	-0.892614	-1.0985
Hic2	0.0371249	2.5136	-0.559771	0.33852	-0.901805	-0.72976	0.219789	-0.255419	0.969981	0.254647	-0.883416	-1.00349
Cd200r2	1.57178	2.60482	-0.41766	-0.41766	-0.41766	-0.41766	-0.41766	-0.41766	-0.41766	-0.41766	-0.41766	-0.41766
Ift57	1.2931	1.42808	0.222835	0.337639	0.715923	1.18327	-1.10292	-1.10292	-1.10292	-1.10292	-0.543654	-0.225508
Filip1l	0.00938121	2.60425	-0.62495	0.608761	-0.867372	-0.66788	0.348395	-0.165607	0.535001	0.120048	-0.906618	-0.993407
Tmprss15	0.80658	1.57299	-1.34697	-1.43465	1.1426	1.21224	0.292393	-0.584021	-0.665159	-0.3838	-0.415165	-0.197048
Bach1	1.07882	1.94056	-0.844391	-0.844391	-0.844391	-0.844391	0.752805	1.09839	-0.844391	-0.844391	0.0926651	0.103104
Krtap14	1.93445	2.33189	-0.426635	-0.426635	-0.426635	-0.426635	-0.426635	-0.426635	-0.426635	-0.426635	-0.426635	-0.426635
Krtap22-2	1.38485	2.06156	-0.646426	-0.646426	-0.646426	-0.646426	-0.646426	-0.646426	-0.646426	-0.646426	0.835908	0.88909
Rsph3b	1.26817	1.77766	-1.05662	-1.89459	0.306259	0.379928	0.0881575	0.294444	0.111348	0.22529	-0.700588	-0.799464
Smok2b	0.721735	1.78173	-0.0353505	0.408451	-1.32994	-0.830028	0.70558	0.0683191	-0.0928676	1.04574	-1.43266	-1.01071
Vmn2r102	0.773338	1.20113	-1.79597	-1.79597	0.511624	0.73437	0.172647	-0.297204	0.867181	0.596705	-0.404558	-0.563298
Vmn1r225	0.434945	1.99524	-1.04335	-0.784528	1.0888	0.0979451	-0.539806	-0.840553	0.771994	0.723558	-0.961642	-0.942611
H2-Q1	0.136868	1.62593	-1.185	0.561534	-1.2099	-0.439138	-0.126403	0.522854	1.13904	1.0591	-0.843051	-1.24185
Esp24	0.46012	1.19596	-0.156042	0.27392	0.217972	0.670721	0.372251	-0.294593	-1.97127	-1.97127	0.744982	0.457244
Esp3	1.75298	1.99653	-0.622924	-0.622924	-0.622924	-0.622924	-0.622924	-0.622924	-0.622924	-0.622924	0.811145	0.422738
Trerf1	0.666752	1.53308	-1.20263	-1.20263	0.479921	0.422105	-0.0811972	-0.193161	-1.20263	-1.20263	0.965979	1.01703
Mkx	1.22847	1.27079	-0.459361	-1.49492	0.292885	0.764107	-1.10278	-1.4653	0.587781	0.942364	-0.330474	-0.233565
Cetn1	1.0012	2.4631	-0.607377	-0.607377	-0.607377	-0.607377	-0.607377	-0.607377	-0.607377	-0.607377	0.638798	0.755911
Aqp4	1.3549	2.16282	-0.782922	-0.385628	0.656185	0.154055	0.0297233	-0.862483	-0.14281	0.0219483	-0.91301	-1.29277
Eno1b	0.335636	1.42478	-1.64698	0.215039	0.644448	0.644735	0.173596	-0.552519	1.19158	0.200506	-1.23965	-1.39117
Ftmt	0.72411	2.05009	-0.258757	0.39673	0.412542	0.12676	-1.52071	-1.52071	0.767321	-0.109625	-0.715901	-0.351855
Spink7	2.09595	2.18503	-0.428097	-0.428097	-0.428097	-0.428097	-0.428097	-0.428097	-0.428097	-0.428097	-0.428097	-0.428097
Apcdd1	1.3137	1.32407	-0.921231	-0.921231	-0.921231	-0.921231	-0.921231	-0.921231	0.736939	0.750959	1.11293	0.288782
Mbd2	1.33656	1.39388	-0.0467623	0.0354937	0.598272	0.253199	-1.57397	-1.57397	-0.748515	-0.79695	0.381422	0.741332
Skor2	1.67353	2.01657	-0.631404	-0.631404	-0.631404	-0.631404	-0.631404	-0.631404	-0.631404	-0.631404	0.772866	0.588265
Mbp	1.93097	2.33487	-0.426584	-0.426584	-0.426584	-0.426584	-0.426584	-0.426584	-0.426584	-0.426584	-0.426584	-0.426584
Ms4a7	0.942812	1.83572	-1.18968	-1.18968	0.495315	0.152827	-1.18968	-1.18968	0.542781	0.670542	0.232429	-0.113716
Olfr1423	0.237365	2.13462	-0.825868	-0.855435	-0.794282	-0.97066	-0.732966	-0.394369	1.28083	1.02367	0.0311845	-0.134097
Olfr1463	1.32418	1.92469	-0.843527	-0.843527	0.983182	0.461906	-0.843527	-0.843527	-0.843527	-0.843527	0.0707792	0.296419
Olfr1487	1.00572	1.69512	-0.647256	-1.04465	0.499852	-0.605571	0.697965	0.493733	0.842779	-0.3107	-1.31069	-1.3163
Olfr1501	1.88926	2.36994	-0.42592	-0.42592	-0.42592	-0.42592	-0.42592	-0.42592	-0.42592	-0.42592	-0.42592	-0.42592
Tmc1	0.938424	1.66482	0.209983	0.76589	-1.31903	-0.958355	-1.22145	-1.2995	0.735472	0.248619	0.469523	-0.234396
Fgfbp3	1.33571	1.40933	0.341647	0.617499	0.792253	0.492284	-1.20539	-1.20539	-1.20539	-1.20539	-0.217327	0.0501642
Sorcs3	1.12932	1.2248	-0.517356	0.161519	1.19213	0.795808	-1.2251	-1.3867	-0.989825	-1.09992	0.41699	0.298333
Mcm10	0.808171	1.44595	0.497319	0.357247	-1.21058	-1.21058	-1.21058	-1.21058	1.19895	0.608585	0.28596	-0.359876
Plpp7	1.32077	1.57231	0.886837	1.55978	-0.667461	-0.667461	-0.667461	-0.667461	-0.667461	-0.667461	-0.667461	-0.667461
Fjx1	0.613473	1.97049	-0.87969	-0.87969	1.06611	0.62906	-0.87969	-0.87969	-0.87969	-0.87969	0.681673	0.317335
Olfr1284	1.21739	2.57036	-0.567239	-0.567239	-0.567239	-0.567239	-0.567239	-0.567239	-0.567239	-0.567239	0.542046	0.208119
Mtln	0.282219	1.51733	-1.47566	0.934242	-0.280331	-0.440247	1.05203	1.3193	-0.989375	-0.326048	-1.01264	-0.580817
Tgm6	1.83063	1.89571	-0.630695	-0.630695	-0.630695	-0.630695	-0.630695	-0.630695	-0.630695	-0.630695	0.62292	0.696303
Btbd3	0.793396	1.9072	-1.25387	-1.25387	1.04716	0.802986	-0.39835	-0.330713	0.390775	-0.0232258	-0.919527	-0.761963
Phactr3	0.873213	1.31599	1.18307	0.477238	-1.25306	-1.25306	-1.25306	-1.25306	0.357102	-0.106592	0.6021	0.310126
Pex2	0.125082	2.73045	-0.499437	0.434386	-0.705802	-0.721368	-0.0128103	-0.197526	0.600362	0.0708667	-0.868242	-0.955962
Cp	1.38366	1.51903	0.313924	0.800737	-0.91067	-0.91067	-0.91067	-0.91067	-0.91067	-0.91067	0.812656	0.63401
Egfem1	1.64812	1.70458	-0.851932	-0.851932	0.847851	0.373156	-0.851932	-0.851932	-0.851932	-0.851932	0.370528	0.167357
Sox2	1.4918	2.5866	-0.126544	0.104793	-0.507081	-0.507081	-0.507081	-0.507081	-0.507081	-0.507081	-0.507081	-0.507081
Ccdc144b	1.06105	2.33108	-0.624568	-0.624568	-0.624568	-0.624568	-0.624568	-0.624568	-0.624568	-0.624568	0.929641	0.67478
Mgst2	0.723065	1.3498	-0.434932	0.491878	0.717547	0.355412	-1.92552	-1.92552	0.28845	0.284692	0.0204537	0.0546823
Stoml3	1.59994	2.384	-0.569327	-0.569327	-0.569327	-0.569327	-0.569327	-0.569327	-0.569327	-0.569327	0.264906	0.305764
Dchs2	0.457099	1.54424	0.387558	1.43286	0.85691	0.150544	-1.16497	-1.16497	-1.16497	-1.16497	-0.124471	-0.0448541
Phgdh	1.81838	1.94907	-0.62112	-0.62112	-0.62112	-0.62112	-0.62112	-0.62112	-0.62112	-0.62112	0.808713	0.392804
Chil4	0.953115	1.46416	1.11441	0.801476	-1.60414	-1.65931	0.329106	-0.0483036	-0.287239	-0.0586553	-0.368634	-0.635994
Npnt	1.13252	1.98314	0.835914	0.455205	0.49169	0.318182	-0.869442	-0.869442	-0.869442	-0.869442	-0.869442	-0.869442
Gbp5	1.25599	1.58401	-1.1075	-1.1075	0.91943	0.297973	-1.1075	-1.1075	0.395795	0.762586	-0.507107	-0.27866
Gipc2	1.30012	1.59977	-0.672854	-0.672854	-0.672854	-0.672854	-0.672854	-0.672854	-0.672854	-0.672854	1.39323	1.08972
St6galnac3	0.827348	1.44655	-1.71629	-1.40015	-0.230468	-0.555938	0.881542	-0.353862	0.565182	1.21364	-0.462331	-0.21522
Bach2	0.772678	1.72199	0.851251	1.02984	-0.906831	-0.906831	-0.906831	-0.906831	-0.906831	-0.906831	0.807477	0.257749
Lingo2	0.357088	1.81544	-0.885534	0.0821218	1.0478	1.00319	0.570714	-1.65036	-0.160109	-0.620365	-0.828931	-0.731059
1700009N14Rik	0.964504	1.39433	-0.886816	-0.547377	0.332006	-0.097767	0.31666	-0.414453	-1.48905	-1.55639	1.13222	0.852132
Acnat1	1.81715	2.42811	-0.424526	-0.424526	-0.424526	-0.424526	-0.424526	-0.424526	-0.424526	-0.424526	-0.424526	-0.424526
Olfr270	1.00608	1.20572	-1.23328	-1.23328	0.844541	0.26307	-1.23328	-1.23328	1.11518	0.639345	-0.122069	-0.0187543
Klf4	1.94504	2.26733	-0.622725	-0.445339	-0.534628	-0.57435	-0.335799	-0.498256	-0.456825	-0.495999	-0.00665128	-0.241793
Prkaa2	0.931841	1.66927	-0.100748	0.24518	0.996058	1.19642	-0.951222	-1.18493	-0.994804	-1.05865	-0.0984717	-0.649952
Olfr1333	0.811366	1.7132	-0.920969	-0.920969	0.696029	0.802905	-0.920969	-0.920969	-0.920969	-0.920969	0.92429	0.578027
Lao1	0.737231	1.28836	-1.20666	-1.20666	0.251713	0.910808	-1.20666	-1.20666	1.2251	0.59219	-0.415026	0.236248
Gjb4	2.01875	2.25745	-0.42762	-0.42762	-0.42762	-0.42762	-0.42762	-0.42762	-0.42762	-0.42762	-0.42762	-0.42762
Camk2n1	-0.116048	1.70579	-1.7826	0.272742	-0.705686	-0.530504	1.02967	0.990252	0.555909	0.333071	-1.03243	-0.720159
Pramel4	0.515342	1.40628	0.142706	-0.854701	-1.12745	-1.28702	1.27654	-0.65168	0.859881	1.12399	-0.567984	-0.835907
Kcnk3	1.46197	2.67428	-0.413625	-0.413625	-0.413625	-0.413625	-0.413625	-0.413625	-0.413625	-0.413625	-0.413625	-0.413625
Cpz	-0.295268	1.99166	0.183415	1.0855	-0.222901	0.176956	-0.393295	1.12735	-0.254811	-0.960744	-1.58501	-0.852856
C1qtnf7	1.20449	1.45593	0.212326	-0.00722825	1.27416	0.530426	-1.16654	-1.16654	-1.16654	-1.16654	0.132612	-0.136558
Gm3286	1.21159	1.6888	-0.910951	-0.910951	0.796735	0.714505	-0.910951	-0.910951	-0.910951	-0.910951	0.53638	0.517702
Gbp9	1.59086	1.70958	0.205861	0.910039	-0.856623	-0.856623	-0.856623	-0.856623	-0.856623	-0.856623	0.437404	0.285985
Denr	0.0297084	0.803631	-0.585235	0.737858	0.723157	0.540974	-1.95109	-1.95109	0.718	0.696503	0.0540405	0.183543
Ncf1	1.22893	2.27237	-0.628518	-0.628518	-0.628518	-0.628518	-0.628518	-0.628518	-0.628518	-0.628518	0.772183	0.75466
Bud31	1.73672	2.48952	-0.422624	-0.422624	-0.422624	-0.422624	-0.422624	-0.422624	-0.422624	-0.422624	-0.422624	-0.422624
Cdk8	1.53144	2.38344	-0.00674579	0.55108	-0.496069	-0.583621	-0.477852	-0.583348	-0.260552	-0.669929	-0.826365	-0.561481
Rxfp2	1.17935	2.15895	-0.632398	-0.632398	-0.632398	-0.632398	0.494419	1.22646	-0.632398	-0.632398	-0.632398	-0.632398
Gpr85	0.707104	1.24095	0.863435	1.04105	0.693041	0.747443	-1.20693	-1.20693	-1.20693	-1.20693	-0.512643	0.0473479
Trpv5	0.419141	2.3079	-0.788652	-0.788652	0.0647286	0.223941	-0.788652	-0.788652	0.51235	1.20385	-0.788652	-0.788652
Npvf	1.38883	1.66795	-0.670515	-0.670515	-0.670515	-0.670515	-0.670515	-0.670515	1.27707	1.03028	-0.670515	-0.670515
Aldh1l1	0.825314	1.8373	-0.578092	-0.196308	0.925027	0.321349	-1.54381	-1.54381	0.475795	0.351173	-0.199009	-0.674934
Chl1	-0.220214	1.77059	-1.46982	0.554208	-1.49578	-0.161869	0.4551	1.58259	-0.0868293	-0.0974101	-0.338517	-0.492042
Klrg1	0.373205	1.11484	-1.05313	0.854516	-0.763158	0.118895	1.00454	1.05457	0.215143	0.210037	-1.37284	-1.75662
Tas2r114	1.24395	2.21116	-0.635544	-0.635544	-0.635544	-0.635544	-0.635544	-0.635544	-0.635544	-0.635544	0.863775	0.765468
Tas2r140	0.979251	1.14531	-0.176333	0.470308	0.373004	0.721224	-1.27355	-1.27355	-1.27355	-1.27355	0.591214	0.990214
Pbp2	1.2468	1.47696	-0.296718	0.869228	-0.187582	0.207095	-1.57146	-1.57146	0.505839	0.563484	-0.792197	-0.45
Far2	0.272001	2.14409	-0.196996	0.420208	0.869974	0.462117	-0.530917	-0.383292	-1.53038	-1.53038	-0.121075	0.124657
Shisa7	1.91152	2.35136	-0.426288	-0.426288	-0.426288	-0.426288	-0.426288	-0.426288	-0.426288	-0.426288	-0.426288	-0.426288
Vmn1r57	1.89502	2.36516	-0.426018	-0.426018	-0.426018	-0.426018	-0.426018	-0.426018	-0.426018	-0.426018	-0.426018	-0.426018
Vmn1r59	1.76914	2.18384	-0.587457	-0.587457	-0.587457	-0.587457	-0.587457	-0.587457	-0.587457	-0.587457	0.548519	0.198158
Obox1	1.80083	2.03869	-0.919098	-0.919098	-0.0673083	-0.161664	-0.919098	-0.919098	0.328219	-0.237594	0.102977	-0.127763
Psg25	1.2762	1.62202	0.680382	1.26665	-0.874797	-0.874797	-0.874797	-0.874797	-0.874797	-0.874797	0.204105	0.199429
Zfp420	0.442055	1.68037	-1.12315	-1.12315	0.203432	0.559878	1.22046	0.943567	-1.12315	-1.12315	-0.12836	-0.428795
Tshz3	-0.558897	1.70973	-1.83295	-0.482661	-1.04171	-0.216583	0.241036	-0.726722	1.0895	0.936175	0.450184	0.432889
Pop4	1.46044	1.74349	-0.751299	-0.734854	1.44373	0.180455	-0.778883	-0.774209	-0.0896847	-0.0461181	-0.934776	-0.718292
Syt3	0.0527712	1.84653	-1.12123	-1.12123	0.0437142	0.255706	-1.12123	-1.12123	0.835649	-0.36178	0.805944	1.0064
Mrgprb2	1.97227	2.29907	-0.427134	-0.427134	-0.427134	-0.427134	-0.427134	-0.427134	-0.427134	-0.427134	-0.427134	-0.427134
4933405O20Rik	1.66727	1.78806	-1.11091	-1.14674	-0.64064	-0.547208	-0.516651	-0.559515	0.911753	0.527295	-0.237842	-0.134875
Gabra5	1.72774	2.49616	-0.422389	-0.422389	-0.422389	-0.422389	-0.422389	-0.422389	-0.422389	-0.422389	-0.422389	-0.422389
Lysmd4	0.604578	1.21008	-1.72788	-1.72788	0.466475	0.167373	-0.0948896	-0.395124	1.18174	1.05562	-0.412341	-0.327744
Efl1	1.26045	1.30636	0.0760554	1.01502	0.570312	0.79595	-1.18768	-1.18768	-1.18768	-1.18768	-0.259513	-0.0139218
Tmc3	1.58869	2.00524	-0.630402	-0.630402	-0.630402	-0.630402	-0.630402	-0.630402	-0.630402	-0.630402	0.388776	1.06051
Prss23	2.04227	2.23583	-0.42781	-0.42781	-0.42781	-0.42781	-0.42781	-0.42781	-0.42781	-0.42781	-0.42781	-0.42781
Lmo1	0.740136	1.99085	-1.49542	-0.934496	1.30111	0.458252	-0.618748	-0.0170622	-0.0936446	-0.89535	-0.524265	0.0886409
Acsm2	1.01324	1.8505	0.28322	1.58751	-0.796656	-0.796656	-0.796656	-0.796656	-0.796656	-0.796656	-0.241466	0.286931
Fgf4	1.78606	2.45227	-0.423833	-0.423833	-0.423833	-0.423833	-0.423833	-0.423833	-0.423833	-0.423833	-0.423833	-0.423833
Efnb2	0.68431	1.89167	-1.03945	0.136315	0.937686	0.577678	-0.635493	0.00927523	0.399289	-0.11797	-1.52605	-1.31727
Sox1	0.311438	1.22588	-0.720696	0.0734371	0.511437	-0.156022	0.987619	0.219266	0.912553	0.110226	-2.32189	-1.15325
Csmd1	0.670551	1.16941	-0.514343	-0.220604	0.575358	0.201305	-2.01916	-1.68467	1.12239	0.535321	-0.025282	0.189717
Ppp1r3b	1.13281	1.51196	-0.674263	-0.674263	-0.674263	-0.674263	-0.674263	-0.674263	-0.674263	-0.674263	1.29027	1.45906
Mfhas1	0.847134	1.79751	-0.89093	-0.89093	1.22799	0.313873	-0.89093	-0.89093	0.506821	0.652245	-0.89093	-0.89093
Naf1	0.0868428	1.19691	-1.88395	-1.88395	1.16557	0.804937	-0.184291	-0.11788	-0.122937	0.457344	0.423488	0.0579197
Fcho1	0.647751	1.01082	-1.61278	-0.272901	0.952346	0.818753	0.472778	-2.01849	-0.846999	0.321436	0.418926	0.108357
Rasd2	1.5749	2.60277	-0.417767	-0.417767	-0.417767	-0.417767	-0.417767	-0.417767	-0.417767	-0.417767	-0.417767	-0.417767
Ces2a	1.19827	1.5789	-1.20831	-1.20831	0.630154	0.638117	-1.20831	-1.20831	0.501391	-0.188466	0.354199	0.120664
1700018B08Rik	-1.26433	1.37523	-1.28066	0.876433	-0.338015	-0.195321	0.942458	0.176396	1.02983	0.820691	-1.08807	-1.05464
Mmp10	1.20713	1.35778	-0.896314	-0.896314	1.28652	0.9406	-0.896314	-0.896314	-0.896314	-0.896314	0.582356	0.00349922
Olfr834	1.15778	1.9829	-0.658307	-0.658307	-0.658307	-0.658307	-0.658307	-0.658307	-0.658307	-0.658307	1.03783	1.08795
Olfr846	0.876424	1.3514	-0.908839	-0.908839	1.27104	1.25352	-0.908839	-0.908839	-0.908839	-0.908839	0.443482	0.257168
Zfp317	1.76316	2.46973	-0.423288	-0.423288	-0.423288	-0.423288	-0.423288	-0.423288	-0.423288	-0.423288	-0.423288	-0.423288
Olfr58	1.56905	1.63643	-0.665061	-0.665061	1.26379	0.851212	-0.665061	-0.665061	-0.665061	-0.665061	-0.665061	-0.665061
Igsf9b	1.28612	1.48671	-0.858726	0.488722	0.268924	-0.062308	0.411791	-0.939221	0.991815	-0.410953	-1.73971	-0.92317
Olfr891	1.33582	1.79585	-0.86609	-0.86609	0.464646	0.304909	-0.86609	-0.86609	1.06122	0.234102	-0.86609	-0.86609
Olfr969	0.579992	0.953912	-0.178708	0.701354	0.542278	0.772747	-1.88204	-1.88204	0.757916	0.519443	-0.539219	-0.345637
Olfr976	1.24454	1.43933	-0.901778	-0.901778	1.23503	0.785914	-0.901778	-0.901778	-0.901778	-0.901778	0.585476	0.120385
Gramd1b	1.50993	1.56878	-1.61747	-1.61747	-0.481413	-0.574921	0.497467	-0.112577	0.212158	0.302938	0.059955	0.252629
Slc9a9	1.28637	1.64303	-0.879087	-0.879087	-0.879087	-0.879087	-0.879087	-0.879087	0.908942	0.318835	0.080711	1.03664
Pdcd6ip	0.594047	1.32522	-0.298972	0.495806	0.567541	-0.525926	1.10549	0.791075	-1.32427	-1.54352	-1.38983	0.203341
Cnot10	1.14465	1.73517	0.479622	1.2151	-0.876804	-0.876804	-0.876804	-0.876804	-0.876804	-0.876804	0.0938697	0.59242
Limd1	1.66695	1.81432	-0.00124702	0.822886	-0.611172	-1.05015	-0.460087	-0.916911	0.626518	-0.326172	-0.792521	-0.772416
Usp11	0.414513	1.86625	-0.883988	-0.883988	0.228645	0.954972	-0.883988	-0.883988	0.904437	0.935117	-0.883988	-0.883988
Gm10488	0.647288	2.22924	0.394792	1.01563	0.516385	0.17313	-0.82941	-0.82941	-0.82941	-0.82941	-0.82941	-0.82941
Actrt1	1.28963	2.27315	-0.624244	-0.624244	0.834042	0.597135	-0.624244	-0.624244	-0.624244	-0.624244	-0.624244	-0.624244
Cldn34d	0.428474	1.89505	-1.34649	-1.34649	-1.00407	-1.05253	0.371631	0.737129	0.582429	0.399722	0.518666	-0.183531
Zc4h2	2.11203	2.16939	-0.428142	-0.428142	-0.428142	-0.428142	-0.428142	-0.428142	-0.428142	-0.428142	-0.428142	-0.428142
Pou3f4	1.27631	2.35276	0.120989	0.70932	-0.819041	-0.592994	-0.263007	-0.86914	-0.0849567	-0.138019	-0.925621	-0.766603
Dach2	0.945238	1.45407	0.116408	1.27883	0.211733	-0.294275	0.457083	-0.971864	0.119147	-0.148507	-1.63098	-1.53689
Nap1l3	1.15669	1.77601	0.340818	1.32861	0.0387875	-0.0672653	-1.06925	-1.06925	-1.06925	-1.06925	-0.189059	-0.107603
Il1rapl2	1.19753	1.41081	-0.93531	-0.93531	0.686853	0.633436	0.705496	0.97774	-0.93531	-0.93531	-0.93531	-0.93531
Amot	0.995675	2.26129	0.0274272	0.666803	-0.394386	-0.382264	-0.943831	-0.943831	0.750072	-0.14929	-0.943831	-0.943831
Phf3	-0.130551	-0.256533	2.11551	2.0459	-0.302894	-0.26729	-0.709256	-0.709256	-0.709256	-0.709256	-0.265094	-0.102026
Serpinb12	0.665371	0.933075	1.62637	0.509555	0.92065	0.894872	-0.924982	-0.924982	-0.924982	-0.924982	-0.924982	-0.924982
Serpinb7	1.0914	0.733537	1.43346	0.952828	0.901982	0.497612	-0.935137	-0.935137	-0.935137	-0.935137	-0.935137	-0.935137
Nfasc	-0.384969	-0.567963	1.98797	1.82528	0.263057	0.124504	-0.852187	-0.978793	-0.58178	-1.05252	0.0508566	0.166546
Zbtb41	0.777097	0.106527	1.82317	1.50182	0.342148	-0.360589	-1.06651	-1.06651	-1.06651	-1.06651	-0.0148922	0.0907756
Prdx6	0.0918487	-0.410891	1.86603	1.49612	0.827012	0.23373	-1.03865	-1.03865	-1.03865	-1.03865	-0.128343	0.179087
Selp	0.0438798	-0.590254	1.37994	1.16231	0.829899	1.04812	-1.15203	-1.15203	-1.15203	-1.15203	0.487326	0.246903
Hhipl2	0.663172	-0.497911	1.59126	1.54594	0.110428	0.0934924	-1.09526	-1.09526	-1.09526	-1.09526	0.130398	0.74426
Ints7	1.01156	-0.0290248	2.11352	0.774187	0.481411	-0.0318475	-1.0812	-1.0812	-1.0812	-1.0812	-0.0172387	0.0222395
Sash1	-0.609976	-0.780579	1.46802	1.25798	1.10422	0.806488	-1.12142	-1.1166	-0.804777	-0.978543	0.412605	0.362576
1700020N01Rik	1.04093	-0.179625	1.47518	1.45992	0.424986	0.416862	-1.13286	-1.13286	-1.13286	-1.13286	-0.257288	0.150471
Sgk1	-0.506161	-0.31915	2.59601	1.57312	-0.449998	-0.373577	-0.417721	-0.300958	-0.436199	-0.52034	-0.385386	-0.459645
Slc2a12	-0.159318	-0.452299	1.43841	0.785783	0.899268	0.451778	-1.17748	-1.17748	-1.17748	-1.17748	0.880017	0.866298
Moxd1	0.58622	-0.665408	1.1342	0.175871	0.995313	0.604764	-1.19018	-1.19018	-1.19018	-1.19018	0.888121	1.04163
Olfr814	0.819496	-0.0901434	0.9883	0.433896	0.719027	0.732817	-1.30337	-1.30337	-1.30337	-1.30337	0.734051	0.876017
Limk2	0.166962	-0.354806	1.6985	1.27068	0.754632	1.25649	-0.974452	-0.974452	-0.974452	-0.974452	-0.445081	-0.44958
Vstm2a	0.0872818	-0.0349729	1.39209	0.49521	0.861875	0.348048	-1.88673	-1.88673	0.821649	-0.267991	0.229034	-0.158767
Ranbp17	0.268926	-0.584322	1.28342	1.24204	0.877934	0.376839	-1.63384	-1.63384	-0.532446	-0.48676	0.789469	0.0325775
Scgb3a1	-1.74586	0.609068	1.65485	1.09406	1.29798	0.0039797	-0.153389	-0.41844	-0.171695	-0.557913	-0.560229	-1.05241
Cnot6	0.0857637	-0.926677	1.70333	1.62584	-0.223885	-0.291053	-1.40701	-1.40701	0.555847	0.418134	-0.100979	-0.0322967
Snap47	1.23524	0.154675	1.45735	1.13894	0.220338	0.722971	-1.16339	-1.16339	-1.16339	-1.16339	-0.192564	-0.0833784
Ulk2	-0.180223	-0.267448	2.04453	1.92861	-0.103089	-0.495502	-1.10698	-1.10698	0.0978497	-0.0702284	-0.351697	-0.388837
Cygb	0.828651	0.832415	1.2879	1.26253	0.923751	0.490158	-0.937567	-0.937567	-0.937567	-0.937567	-0.937567	-0.937567
Ccdc57	0.365853	-0.121309	1.61077	1.39155	0.923549	0.494392	-1.13938	-1.13938	-1.13938	-1.13938	-0.164556	0.0572559
9030624G23Rik	-0.0684053	-0.362989	1.96542	0.842064	0.218683	0.245796	-1.37531	-1.37531	-0.786336	-0.798326	0.865014	0.629694
Gpr22	0.924297	0.152666	1.0965	0.893689	0.549509	0.352151	-1.31115	-1.31115	-1.31115	-1.31115	0.688766	0.587006
Mis18bp1	-0.042025	-1.33179	1.38785	1.13773	0.780807	0.448581	-0.39497	-1.1981	-1.03949	-1.13917	0.337132	1.05345
Tmx1	0.34837	-0.599273	1.74199	1.15525	0.762471	0.477185	-1.53919	-1.53919	-0.454607	-0.304067	0.364633	-0.413571
Ttc7b	-0.432671	-0.512561	1.46865	1.19972	0.984554	1.26907	-1.03628	-1.03628	-1.03628	-1.03628	-0.095057	0.263399
Gm906	0.755475	0.798545	1.53168	1.46481	0.267278	0.592112	-0.90165	-0.90165	-0.90165	-0.90165	-0.90165	-0.90165
Secisbp2	0.933813	-0.0767852	1.87238	0.964236	0.659026	0.722046	-1.037	-1.037	-1.037	-1.037	-0.467323	-0.459409
Zfp935	-0.566943	-0.803777	1.73518	1.72013	0.824526	0.48708	-1.16656	-1.16656	-0.40631	-0.494789	-0.102982	-0.0589855
Ice1	0.0637961	0.311113	1.81183	1.51244	0.240009	-0.273413	-1.10629	-1.10629	-1.10629	-1.10629	0.4597	0.299673
Hmgcr	0.936261	0.416931	1.96241	1.56412	-0.776115	-0.776115	-0.776115	-0.776115	-0.0306485	-0.192379	-0.776115	-0.776115
Pik3r1	0.50639	-0.052685	1.81	1.43295	0.717298	-0.0171257	-1.33241	-1.33241	-0.760698	-0.872536	-0.0723396	-0.0264484
Cd180	-0.366485	-0.575024	1.94272	1.80655	-0.12247	-0.441698	-1.24836	-1.24836	0.376682	-0.12546	-0.0787467	0.0806575
Fst	0.754822	0.0699014	1.00427	0.826794	0.690102	0.97989	-1.75816	-1.75816	-0.0587074	0.509067	-0.459089	-0.800733
Slmap	0.161221	-0.588193	1.09923	0.947484	1.02395	0.573252	-1.20815	-1.20815	-1.20815	-1.20815	0.783763	0.831909
Amer2	-0.0100528	0.135936	2.06279	0.330041	-0.0767233	-0.274547	1.43865	-0.214635	0.0401301	-0.582204	-1.32411	-1.52528
Sacs	1.56765	-0.231055	1.68173	1.38899	-0.454202	-1.04334	-0.9888	-1.04026	0.0431998	-0.552708	-0.168003	-0.203191
Bora	1.41753	0.313436	1.68105	0.152546	0.630515	0.290971	-1.17545	-1.17545	-1.17545	-1.17545	0.0338239	0.181916
Gpc5	0.12943	0.642303	1.81848	1.50883	0.848811	-0.0565695	-0.96227	-0.96227	-0.96227	-0.96227	-0.612318	-0.429881
Oxr1	-0.584685	-0.474749	2.31277	1.92382	-0.148668	-0.264105	-0.379398	-0.472405	-0.41237	-0.536717	-0.454042	-0.50945
Gcat	0.746147	-0.0874364	1.78692	1.65693	-0.235788	-0.0666349	-0.297683	0.227416	-1.35917	-1.35917	-0.718465	-0.293074
Snx29	-0.906531	-0.729745	1.27657	0.814791	1.07795	0.553751	-1.7945	-1.46851	0.638868	0.146805	0.17475	0.215785
Mapk1	0.169792	-0.491469	1.38518	1.13194	1.10101	0.295513	-1.18049	-1.18049	-1.18049	-1.18049	0.471707	0.658275
Iqcg	0.546141	-0.0154692	1.28415	1.08587	0.00415017	-0.536896	-1.78066	-1.78066	0.816648	0.714731	-0.103036	-0.234979
Tiam1	0.755206	0.698446	2.02972	1.55332	-0.626832	-0.669312	-0.623829	-0.736946	-0.243775	-0.5229	-0.839921	-0.773178
Igf2r	0.291727	-0.395104	1.93359	1.78626	0.359826	0.221582	-0.938255	-0.938255	-0.938255	-0.938255	-0.345908	-0.0989477
Tcte3	0.235975	-0.35035	1.48467	1.16345	1.31123	0.252655	-0.0165401	-0.197202	-1.61693	-1.61693	-0.349587	-0.300443
Pdcd2	0.297872	0.0155475	1.75742	1.28574	0.976296	0.324066	-1.12881	-1.12881	-1.12881	-1.12881	-0.117352	-0.0243532
Has1	0.227545	0.951133	1.58372	1.38655	0.432994	0.320198	-1.14534	-1.14534	-1.14534	-1.14534	-0.0503853	-0.270406
Zfp677	0.352997	0.45339	2.04761	0.260689	1.3084	0.645108	-0.844699	-0.844699	-0.844699	-0.844699	-0.844699	-0.844699
Luc7l	0.0776381	-0.712787	1.56677	1.54599	0.797673	0.591489	-1.3365	-1.3365	-0.736856	-0.691564	-0.0125343	0.247172
Esp8	0.701456	1.42708	1.42947	1.2705	0.311521	0.164554	-0.884095	-0.884095	-0.884095	-0.884095	-0.884095	-0.884095
Polh	0.664668	0.341276	1.85221	1.77932	-0.789874	-0.789874	-0.789874	-0.789874	-0.789874	-0.789874	-0.168796	0.270573
Armc4	0.0657646	-0.736237	1.74836	0.986067	0.947888	1.1253	-1.31743	-1.31743	-0.334568	-0.724321	-0.38544	-0.0579661
Mpp7	0.0142536	-0.495789	1.87063	1.65781	0.950606	0.266602	-0.216814	-0.548741	-0.609988	-0.96331	-0.839791	-1.08547
Trappc8	-0.39906	-0.512583	2.13466	1.42972	0.138275	0.394291	-1.28194	-1.28194	-0.28339	-0.601843	0.27058	-0.00677347
Apc	0.86597	-0.0476641	1.3719	1.35256	0.9771	0.0692077	-1.17924	-1.17924	-1.17924	-1.17924	0.0084506	0.119441
Wdr7	0.705251	-0.275824	1.63573	1.59522	0.0300393	0.204724	-1.11484	-1.11484	-1.11484	-1.11484	0.41009	0.154109
Nars	1.2331	1.13648	1.65828	0.756115	-0.886313	-0.886313	-0.886313	-0.886313	-0.886313	-0.886313	0.339245	0.194667
Kmt5b	0.408553	-0.367532	1.84618	1.66759	0.0510699	0.267002	-1.04543	-1.04543	-1.04543	-1.04543	0.0664792	0.242375
Cstf2t	0.362346	-0.347655	1.71377	1.46456	0.776046	-0.0428967	-1.26773	-1.26773	-0.886202	-0.975332	0.229336	0.241478
Atad1	0.203971	-0.156975	1.68603	1.19705	0.513847	0.437978	-1.20152	-1.20152	-1.20152	-1.20152	0.479742	0.444425
Rapgef1	-0.526243	-0.763535	1.74607	1.62707	0.973416	0.50838	-1.18813	-1.18813	-0.344612	-0.464093	-0.2545	-0.125696
Gpd2	-0.199517	-0.339234	1.72606	1.63631	0.247687	-0.315426	-1.01863	-1.01863	-1.01863	-1.01863	0.721156	0.597475
Wdsub1	1.09416	0.13828	1.54598	1.15345	0.195365	-0.0453506	-1.19692	-1.19692	-1.19692	-1.19692	0.50027	0.205513
Slc38a11	0.319398	-0.135185	1.6126	1.59626	0.892517	0.294902	-1.09169	-1.09169	-1.09169	-1.09169	-0.276703	0.0629576
Fam171b	-0.45602	-0.45255	1.48038	1.45459	1.10953	1.04277	-0.992407	-0.992407	-0.992407	-0.992407	-0.112127	-0.0969419
Ccdc34	0.207064	-0.920607	1.44138	0.751686	0.965196	0.801999	0.341214	-0.0889114	-1.69393	-1.69393	-0.162602	0.051427
Atrn	-0.168574	0.0767175	2.22831	1.57832	-0.219986	0.142077	-0.925975	-0.925975	-0.925975	-0.925975	0.0993897	-0.0323583
Gm5150	-2.02052	-0.75888	1.23904	0.869888	0.859794	-0.0217634	-0.833706	-0.728612	1.04261	0.550824	-0.679777	0.48111
Arhgef11	-0.053508	0.245377	1.77499	1.23969	0.388494	-0.289546	-1.60203	-1.60203	0.680196	0.0826907	-0.571289	-0.293024
Gja8	1.10233	0.256262	1.71674	1.50284	-0.0405353	0.204484	-1.03318	-1.03318	-1.03318	-1.03318	-0.389807	-0.21957
Papss1	-1.28549	-1.52392	1.36187	0.805198	1.33805	-0.00793169	0.786977	-0.56552	-1.25209	0.465689	-0.0760178	-0.0468148
Prkacb	1.04654	0.410279	1.34113	1.16983	0.73544	0.66383	-0.518643	-0.516402	-1.3832	-1.3832	-0.78215	-0.783467
Calb1	0.0478091	-0.118008	1.45454	0.958272	1.04223	0.675685	-1.7736	-1.7736	-0.132894	-0.27953	-0.136511	0.0356068
Ifnk	0.623074	-0.199246	1.93829	1.44776	0.606278	0.37251	-0.97592	-0.97592	-0.97592	-0.97592	-0.51827	-0.366716
Aptx	1.31758	-0.0126236	1.42882	1.1511	-0.89429	-0.89429	-0.89429	-0.89429	-0.89429	-0.89429	0.774015	0.70685
Alad	1.11793	0.586993	1.58995	1.00923	-0.917866	-0.917866	-0.917866	-0.917866	-0.917866	-0.917866	0.400789	0.802312
Lsm10	0.909325	-0.236487	1.37126	0.988777	0.690315	0.541507	-1.22667	-1.22667	-1.22667	-1.22667	-0.0425915	0.68459
CK137956	-0.469326	-0.155939	1.68108	1.63851	0.956399	0.0533548	-1.35578	-1.35578	-0.336712	-0.724523	-0.0369556	0.10568
Gm13090	-1.32114	-1.09284	1.26177	1.19089	1.22493	0.959479	-0.901693	-1.30492	0.215138	0.0868736	-0.224423	-0.0940699
Cd36	-1.28856	0.199899	2.09497	1.49557	-0.604635	-0.973884	-0.56864	-0.389489	0.741699	-0.133293	-0.0106961	-0.562944
Selenoi	0.764879	-0.0663146	1.1721	1.09552	0.779016	0.225266	0.758075	0.360423	-1.27224	-1.27224	-1.27224	-1.27224
Zfp605	0.517373	0.0923461	1.66871	0.865289	0.582418	-0.187689	-1.70322	-1.70322	0.0869906	0.735052	-0.402369	-0.551682
Tesc	-0.0882561	-0.472448	2.1124	2.01223	0.0538058	-0.093403	-0.794486	-0.794486	-0.306469	-0.509913	-0.602521	-0.516449
Ndufb2	0.314532	-0.453533	1.56791	1.01915	0.916739	0.540914	-1.19078	-1.19078	-1.19078	-1.19078	0.542712	0.314688
Zfp30	1.22367	0.635912	1.2748	0.240261	0.968495	1.1802	-0.920557	-0.920557	-0.920557	-0.920557	-0.920557	-0.920557
Mrgpra6	-1.42122	0.0282111	1.5082	1.34159	-1.54164	-0.304125	1.42034	0.0290304	-0.536543	-0.022525	-0.209397	-0.291913
Ano5	-0.787907	-0.715518	1.67713	1.04147	1.2244	0.876667	-1.30501	-1.30501	-0.352137	-0.35695	-0.147833	0.150694
Cyp2e1	0.646191	0.291799	1.55002	1.2753	0.918443	0.125077	-1.18352	-1.18352	-1.18352	-1.18352	-0.079126	0.00636731
Cd209a	0.303981	0.0702841	1.92872	1.02544	0.700506	0.714773	-1.10044	-1.10044	-1.10044	-1.10044	-0.508075	0.166126
Acsl1	0.821789	0.0472574	2.15888	1.35955	0.206004	-0.218552	-0.9393	-0.9393	-0.9393	-0.9393	-0.269164	-0.348563
Wwc2	-0.0715294	-0.507351	1.89444	1.56106	0.214917	0.188534	-1.03279	-1.03279	-1.03279	-1.03279	0.448931	0.402178
Anapc10	-0.308379	-0.115756	1.82279	1.53614	0.990851	0.302162	-1.01513	-1.01513	-1.01513	-1.01513	-0.0924484	-0.0748338
Gm19935	-0.394005	0.576874	1.11975	1.10518	-0.604474	-0.442781	-1.71441	-1.71441	0.973081	-0.00797666	0.695561	0.407601
Cadm1	0.542442	-0.0203097	1.53825	1.2449	1.0494	0.713233	-0.746352	-0.480232	-1.3734	-1.3734	-0.446457	-0.648075
Dmxl2	-0.497456	-0.721531	1.49684	0.638693	1.17106	0.959912	-1.39664	-1.39664	-0.290635	-0.918376	0.423823	0.530959
Snx33	-0.505264	-0.12656	1.61946	0.959022	1.289	0.505489	-1.11019	-1.11019	-1.11019	-1.11019	0.13248	0.567135
Smad6	0.0523236	-0.0186902	2.0354	1.89258	0.101367	0.0221534	-0.877456	-0.877456	-0.877456	-0.877456	-0.377759	-0.197546
Lactb	0.0712547	0.0191935	1.66554	1.59101	0.469367	0.127706	-1.4971	-1.4971	0.0652019	0.305223	-0.638	-0.682287
Nck1	0.702456	0.960401	1.43957	1.34419	0.380656	-0.373204	-1.1614	-1.1614	-1.1614	-1.1614	0.155158	0.0363826
Cmtm8	0.263212	0.0712829	1.47123	0.917469	0.856063	-0.015647	-1.2378	-1.2378	-1.2378	-1.2378	0.475949	0.911658
Bhlhb9	1.48803	0.728374	1.9657	1.01042	-0.649066	-0.649066	-0.649066	-0.649066	-0.649066	-0.649066	-0.649066	-0.649066
Rdh10	-1.01422	-1.01422	1.80049	1.42246	1.00605	0.256482	-1.01422	-1.01422	0.4305	-0.0143948	-0.419872	-0.424835
Tram2	-0.568675	-0.568675	2.27544	1.74772	-0.568675	-0.568675	-0.568675	-0.568675	-0.568675	-0.568675	0.408434	0.117798
Bag2	-0.426431	-0.426431	2.34355	1.92077	-0.426431	-0.426431	-0.426431	-0.426431	-0.426431	-0.426431	-0.426431	-0.426431
Ptpn18	-0.397816	-0.397816	2.85641	1.12175	-0.397816	-0.397816	-0.397816	-0.397816	-0.397816	-0.397816	-0.397816	-0.397816
Arhgef4	-0.472534	-0.472534	2.13601	2.12901	-0.220189	-0.264561	-0.472534	-0.472534	-0.472534	-0.472534	-0.472534	-0.472534
Tmem131	-0.896305	-0.896305	1.61802	1.20985	0.885797	0.0521501	-0.896305	-0.896305	-0.896305	-0.896305	0.881696	0.730327
Txndc9	-1.24955	-1.24955	1.66337	0.521777	0.637612	0.582873	-1.24955	-1.24955	0.470054	-0.0925467	0.580552	0.634502
Eif5b	-1.19949	-1.19949	1.78545	0.832218	0.502834	0.925647	-1.19949	-1.19949	0.43551	0.235153	-0.0167022	0.0978458
Nck2	-0.689926	-0.689926	2.03804	1.85043	0.322074	0.526222	-0.689926	-0.689926	-0.689926	-0.689926	-0.238094	-0.359123
Slc40a1	-0.425103	-0.425103	2.4059	1.84513	-0.425103	-0.425103	-0.425103	-0.425103	-0.425103	-0.425103	-0.425103	-0.425103
Nabp1	-0.573477	-0.573477	2.21593	1.81645	0.327224	0.228217	-0.573477	-0.573477	-0.573477	-0.573477	-0.573477	-0.573477
Sgo2a	-0.42782	-0.42782	2.23454	2.04365	-0.42782	-0.42782	-0.42782	-0.42782	-0.42782	-0.42782	-0.42782	-0.42782
Bzw1	-0.571453	-0.571453	2.00695	2.00466	-0.571453	-0.571453	-0.571453	-0.571453	-0.571453	-0.571453	-0.0234788	0.583493
Gm973	-0.861402	-0.861402	1.9054	1.32584	0.782702	0.58266	-0.861402	-0.861402	-0.861402	-0.861402	0.137687	0.434131
Ndufs1	-0.670422	-0.670422	1.60978	1.40749	1.37274	0.973375	-0.670422	-0.670422	-0.670422	-0.670422	-0.670422	-0.670422
Fzd5	-0.737937	-0.737937	2.21845	1.62444	0.193314	0.270638	-0.737937	-0.737937	-0.737937	-0.737937	-0.104673	0.225462
Myl1	-0.425437	-0.425437	2.39193	1.86244	-0.425437	-0.425437	-0.425437	-0.425437	-0.425437	-0.425437	-0.425437	-0.425437
Tmbim1	-0.426677	-0.426677	2.32935	1.93742	-0.426677	-0.426677	-0.426677	-0.426677	-0.426677	-0.426677	-0.426677	-0.426677
A630095N17Rik	-0.4261	-0.4261	2.36109	1.8999	-0.4261	-0.4261	-0.4261	-0.4261	-0.4261	-0.4261	-0.4261	-0.4261
Fam124b	-0.737733	-0.737733	2.56794	1.37726	0.140617	-0.219512	-0.737733	-0.737733	-0.0745755	-0.157682	-0.348521	-0.334601
Pde6d	-0.885608	-0.885608	1.58823	1.17295	1.17432	0.69635	-0.885608	-0.885608	-0.885608	-0.885608	0.727908	-0.0461084
Gigyf2	-0.944188	-0.944188	1.40483	0.993079	0.862195	0.916749	-0.944188	-0.944188	-0.944188	-0.944188	0.74129	0.746984
Snorc	-0.66719	-0.66719	1.71399	0.943465	1.43905	1.24102	-0.66719	-0.66719	-0.66719	-0.66719	-0.66719	-0.66719
Olfr1415	-0.424883	-0.424883	2.41463	1.8342	-0.424883	-0.424883	-0.424883	-0.424883	-0.424883	-0.424883	-0.424883	-0.424883
Ano7	-0.638338	-0.638338	1.99708	1.16709	-0.638338	-0.638338	-0.638338	-0.638338	-0.638338	-0.638338	1.47278	0.469751
Dtymk	-0.426828	-0.426828	2.31998	1.94829	-0.426828	-0.426828	-0.426828	-0.426828	-0.426828	-0.426828	-0.426828	-0.426828
Gal3st2b	-0.925131	-0.925131	1.40342	1.29627	1.07661	0.527875	-0.925131	-0.925131	-0.925131	-0.925131	0.631266	0.615344
3110009E18Rik	-0.424026	-0.424026	2.4458	1.79446	-0.424026	-0.424026	-0.424026	-0.424026	-0.424026	-0.424026	-0.424026	-0.424026
Rab29	-0.732111	-0.732111	1.95162	1.89576	0.522935	0.249573	-0.732111	-0.732111	-0.732111	-0.732111	-0.213054	-0.0141745
Mfsd4a	-0.649488	-0.649488	1.72785	1.70846	-0.649488	-0.649488	-0.649488	-0.649488	-0.649488	-0.649488	1.17384	0.585753
Ppp1r15b	-0.882124	-0.882124	1.65159	1.2112	1.21118	0.730523	-0.882124	-0.882124	-0.882124	-0.882124	0.15309	0.335157
Ppfia4	-0.425812	-0.425812	2.3751	1.88302	-0.425812	-0.425812	-0.425812	-0.425812	-0.425812	-0.425812	-0.425812	-0.425812
Ipo9	-0.57657	-0.57657	2.52675	1.17116	-0.57657	-0.57657	-0.57657	-0.57657	-0.57657	-0.57657	0.169087	0.745566
Tmem9	-0.598654	-0.598654	2.25055	1.61728	-0.598654	-0.598654	-0.598654	-0.598654	-0.598654	-0.598654	0.342699	0.578698
Ascl5	-0.88506	-0.88506	1.45929	0.597884	-0.88506	-0.88506	-0.88506	-0.88506	1.22173	1.42455	0.0722592	0.534649
Camsap2	-0.748116	-0.748116	1.98172	1.79552	-0.13621	-0.106193	-0.748116	-0.748116	-0.748116	-0.748116	0.532119	0.421748
Kif14	-0.806166	-0.806166	1.68931	1.66896	1.02148	0.626019	-0.806166	-0.806166	-0.806166	-0.806166	-0.161251	-0.0075195
Ivns1abp	-0.566852	-0.566852	2.27211	1.75605	0.418999	0.0876616	-0.566852	-0.566852	-0.566852	-0.566852	-0.566852	-0.566852
Fam20b	-0.621912	-0.621912	2.1251	1.47952	1.04686	0.323812	-0.621912	-0.621912	-0.621912	-0.621912	-0.621912	-0.621912
Cacybp	-0.416161	-0.416161	2.63243	1.52918	-0.416161	-0.416161	-0.416161	-0.416161	-0.416161	-0.416161	-0.416161	-0.416161
Fmo2	-1.21754	-1.21754	1.26105	0.58785	1.10015	-0.385498	-1.21754	-1.21754	0.59842	1.10717	0.374935	0.226093
Mroh9	-0.625467	-0.625467	2.15216	1.00775	1.43334	0.410485	-0.625467	-0.625467	-0.625467	-0.625467	-0.625467	-0.625467
Blzf1	-0.667544	-0.667544	1.58598	1.31841	1.54555	0.890412	-0.667544	-0.667544	-0.667544	-0.667544	-0.667544	-0.667544
Sft2d2	-0.424444	-0.424444	2.43113	1.81331	-0.424444	-0.424444	-0.424444	-0.424444	-0.424444	-0.424444	-0.424444	-0.424444
Fcgr2b	-0.428166	-0.428166	2.15556	2.1261	-0.428166	-0.428166	-0.428166	-0.428166	-0.428166	-0.428166	-0.428166	-0.428166
Stum	-0.93455	-0.93455	1.36984	1.3117	-0.93455	-0.93455	-0.93455	-0.93455	0.610962	0.724682	0.797088	0.793032
Ccdc185	-0.816642	-0.816642	1.82265	1.72241	0.561086	0.615467	-0.816642	-0.816642	-0.816642	-0.816642	0.101623	0.0766169
Esrrg	-1.53982	-1.53982	1.7662	1.21049	0.727988	0.82346	-0.101123	-0.496793	-0.108053	-0.192807	-0.338632	-0.211102
Rd3	-0.427327	-0.427327	2.28407	1.9892	-0.427327	-0.427327	-0.427327	-0.427327	-0.427327	-0.427327	-0.427327	-0.427327
Hsd11b1	-0.427066	-0.427066	2.30393	1.96673	-0.427066	-0.427066	-0.427066	-0.427066	-0.427066	-0.427066	-0.427066	-0.427066
Zbtb2	-0.828507	-0.828507	1.87576	1.47233	0.26469	-0.119562	-0.828507	-0.828507	-0.828507	-0.828507	0.836117	0.641709
Fbxo30	-0.905137	-0.905137	1.49517	1.48677	0.90495	0.63754	-0.905137	-0.905137	-0.905137	-0.905137	0.486092	0.420293
Stx11	-0.427663	-0.427663	2.25292	2.02371	-0.427663	-0.427663	-0.427663	-0.427663	-0.427663	-0.427663	-0.427663	-0.427663
Pex3	-0.83339	-0.83339	1.83288	1.20239	-0.0318253	0.0397315	-0.83339	-0.83339	-0.83339	-0.83339	0.744342	1.21283
Aig1	-0.659834	-0.659834	1.73538	1.6298	1.05275	0.86075	-0.659834	-0.659834	-0.659834	-0.659834	-0.659834	-0.659834
Reps1	-1.36944	-1.36944	1.48909	1.09702	1.42932	0.92502	-0.243213	-0.532344	-0.235232	-0.248243	-0.585563	-0.356975
Mtfr2	-0.54126	-0.54126	2.09083	2.06634	-0.54126	-0.54126	-0.54126	-0.54126	-0.54126	-0.54126	0.0824739	0.0904414
Vnn3	-0.795771	-0.795771	1.56917	1.23841	1.40858	1.04577	-0.795771	-0.795771	-0.795771	-0.795771	-0.307042	-0.180272
Enpp1	-0.757552	-0.757552	1.82255	1.52754	1.30829	0.314164	-0.757552	-0.757552	-0.757552	-0.757552	-0.217248	-0.209985
Trmt11	-0.869701	-0.869701	1.33417	1.16129	0.533893	-0.248617	-0.869701	-0.869701	-0.869701	-0.869701	1.30715	1.13032
Sult3a1	-0.857979	-0.857979	1.55841	1.55446	1.19898	0.486191	-0.857979	-0.857979	-0.857979	-0.857979	0.135411	0.214421
Ccn6	-0.57355	-0.57355	2.14109	1.89942	-0.57355	-0.57355	-0.57355	-0.57355	-0.57355	-0.57355	0.388343	0.159553
Mfsd4b4	-0.620569	-0.620569	2.25028	1.39393	0.802817	0.51753	-0.620569	-0.620569	-0.620569	-0.620569	-0.620569	-0.620569
Mettl24	-0.635658	-0.635658	2.16605	1.36893	-0.635658	-0.635658	-0.635658	-0.635658	-0.635658	-0.635658	0.768831	0.781455
Nr2e1	-0.646432	-0.646432	1.76441	1.56668	-0.646432	-0.646432	-0.646432	-0.646432	-0.646432	-0.646432	0.47527	1.3651
Sec63	-0.614842	-0.614842	1.97548	1.85277	-0.614842	-0.614842	-0.614842	-0.614842	-0.614842	-0.614842	0.696715	0.393762
Bves	-1.07639	-1.07639	1.73979	1.32705	0.99426	0.625741	-1.07639	-1.07639	0.178471	-0.253188	-0.318422	0.0118604
Lin28b	-0.879349	-0.879349	1.61125	0.908771	1.53703	0.638142	-0.879349	-0.879349	-0.879349	-0.879349	0.296152	0.284748
Cep85l	-0.848736	-0.848736	1.91329	1.10407	0.705669	-0.208655	-0.848736	-0.848736	-0.848736	-0.848736	0.712802	0.865235
Lims1	-0.68152	-0.68152	2.01776	2.01079	0.226567	0.0523741	-0.68152	-0.68152	-0.68152	-0.68152	-0.210791	-0.00757433
2022-09-10	-0.786755	-0.786755	1.76205	1.55301	1.16485	0.592041	-0.786755	-0.786755	-0.786755	-0.786755	-0.187912	-0.163514
Mcu	-0.790972	-0.790972	2.0435	1.61705	0.572049	0.256511	-0.790972	-0.790972	-0.790972	-0.790972	0.00703357	0.249691
Ddit4	-0.740546	-0.740546	1.91791	1.81391	0.84253	0.00922962	-0.740546	-0.740546	-0.740546	-0.740546	-0.17292	0.0326156
Psap	-0.665423	-0.665423	1.7637	1.3817	0.907111	1.27087	-0.665423	-0.665423	-0.665423	-0.665423	-0.665423	-0.665423
Tbata	-0.428091	-0.428091	2.18666	2.09426	-0.428091	-0.428091	-0.428091	-0.428091	-0.428091	-0.428091	-0.428091	-0.428091
Ppa1	-0.692644	-0.692644	2.19537	1.78714	0.000617393	0.283427	-0.692644	-0.692644	-0.692644	-0.692644	-0.159033	0.0483451
Kif1bp	-0.893939	-0.893939	1.57878	1.02518	0.393833	1.4372	-0.893939	-0.893939	-0.893939	-0.893939	0.394063	0.534579
Ddx50	-0.840547	-0.840547	1.85275	0.904679	1.34097	0.801421	-0.840547	-0.840547	-0.840547	-0.840547	-0.100044	0.243509
Hnrnph3	-0.858181	-0.858181	1.92297	0.809816	1.02769	1.05438	-0.858181	-0.858181	-0.858181	-0.858181	0.123483	0.210745
Mypn	-0.427947	-0.427947	2.21623	2.06324	-0.427947	-0.427947	-0.427947	-0.427947	-0.427947	-0.427947	-0.427947	-0.427947
Reep3	-0.882414	-0.882414	1.35223	1.25355	0.30267	0.0150517	-0.882414	-0.882414	-0.882414	-0.882414	1.07251	1.29849
Chchd10	-0.869041	-0.869041	1.69752	1.09932	1.35294	0.681802	-0.869041	-0.869041	-0.869041	-0.869041	0.261986	0.120672
Prmt2	-0.599051	-0.599051	1.98467	1.94393	0.293661	0.570146	-0.599051	-0.599051	-0.599051	-0.599051	-0.599051	-0.599051
Pofut2	-0.665072	-0.665072	1.8252	1.3592	1.09068	1.0455	-0.665072	-0.665072	-0.665072	-0.665072	-0.665072	-0.665072
Agpat3	-0.419178	-0.419178	2.57412	1.61766	-0.419178	-0.419178	-0.419178	-0.419178	-0.419178	-0.419178	-0.419178	-0.419178
Sbno2	-0.650437	-0.650437	2.0188	1.38457	0.936342	0.863781	-0.650437	-0.650437	-0.650437	-0.650437	-0.650437	-0.650437
Mknk2	-0.671726	-0.671726	1.58539	1.17506	1.50819	1.10518	-0.671726	-0.671726	-0.671726	-0.671726	-0.671726	-0.671726
Lmnb2	-0.593514	-0.593514	2.11752	1.83347	-0.593514	-0.593514	-0.593514	-0.593514	-0.593514	-0.593514	0.495244	0.301874
Sgta	-0.425812	-0.425812	2.3751	1.88302	-0.425812	-0.425812	-0.425812	-0.425812	-0.425812	-0.425812	-0.425812	-0.425812
Map2k2	-0.668984	-0.668984	1.7699	1.25004	1.11312	1.21881	-0.668984	-0.668984	-0.668984	-0.668984	-0.668984	-0.668984
Fzr1	-0.880186	-0.880186	1.58572	1.39847	0.799942	0.804352	-0.880186	-0.880186	-0.880186	-0.880186	-0.0747796	0.767414
Sirt6	-0.41826	-0.41826	2.59306	1.58953	-0.41826	-0.41826	-0.41826	-0.41826	-0.41826	-0.41826	-0.41826	-0.41826
AU041133	-1.11546	-1.11546	1.5078	1.10742	1.28	0.411894	-0.192414	-0.53532	-1.11546	-1.11546	0.408125	0.474324
Zfp938	-0.755076	-0.755076	2.32829	1.30039	0.575277	0.352647	-0.755076	-0.755076	-0.755076	-0.755076	-0.0891442	0.0629996
Washc4	-0.942345	-0.942345	1.32058	0.838227	0.917162	0.590188	-0.942345	-0.942345	-0.942345	-0.942345	0.820837	1.16708
Polr3b	-0.930849	-0.930849	1.30351	1.28218	0.375268	0.811301	-0.930849	-0.930849	-0.930849	-0.930849	0.817624	0.995212
Mterf2	-0.785997	-0.785997	2.30747	1.07372	0.615621	0.372694	-0.785997	-0.785997	-0.785997	-0.785997	-0.171754	0.518229
Chpt1	-0.84675	-0.84675	1.7834	1.68474	0.516764	0.450671	-0.84675	-0.84675	-0.84675	-0.84675	0.34589	0.299035
Uhrf1bp1l	-0.620852	-0.620852	1.93722	1.8529	0.726106	0.450582	-0.620852	-0.620852	-0.620852	-0.620852	-0.620852	-0.620852
Nr2c1	-0.614557	-0.614557	1.92425	1.91259	-0.614557	-0.614557	-0.614557	-0.614557	-0.614557	-0.614557	0.67217	0.407449
Cep83	-0.827524	-0.827524	1.48367	1.41343	1.39227	0.852964	-0.827524	-0.827524	-0.827524	-0.827524	-0.0160311	-0.161152
Gm33543	-1.12998	-1.12998	1.65084	1.41418	0.501053	0.5037	-1.12998	-1.12998	-0.16206	0.785136	-0.0366564	-0.136263
Cep290	-0.81464	-0.81464	2.09921	1.27565	0.80972	0.561797	-0.81464	-0.81464	-0.81464	-0.81464	0.10908	0.0323843
Pawr	-0.755867	-0.755867	1.86047	1.48479	1.2305	0.495857	-0.755867	-0.755867	-0.755867	-0.755867	-0.23519	-0.301224
Tbc1d15	-0.883401	-0.883401	1.48877	0.931283	1.2223	1.23769	-0.883401	-0.883401	-0.883401	-0.883401	0.454762	-0.0344034
Mdm2	-0.427488	-0.427488	2.27018	2.00471	-0.427488	-0.427488	-0.427488	-0.427488	-0.427488	-0.427488	-0.427488	-0.427488
Rap1b	-0.843224	-0.843224	1.54709	1.44766	1.14286	0.93848	-0.843224	-0.843224	-0.843224	-0.843224	-0.178112	0.161369
Agap2	-0.827413	-0.827413	1.75278	1.45854	0.610716	1.148	-0.827413	-0.827413	-0.827413	-0.827413	-0.0331697	0.0276039
Os9	-0.404293	-0.404293	2.79375	1.24918	-0.404293	-0.404293	-0.404293	-0.404293	-0.404293	-0.404293	-0.404293	-0.404293
Rps26	-0.623021	-0.623021	2.12955	1.60652	-0.623021	-0.623021	-0.623021	-0.623021	-0.623021	-0.623021	0.62472	0.623381
Pym1	-0.425255	-0.425255	2.39965	1.8529	-0.425255	-0.425255	-0.425255	-0.425255	-0.425255	-0.425255	-0.425255	-0.425255
Tespa1	-0.428063	-0.428063	2.1938	2.08683	-0.428063	-0.428063	-0.428063	-0.428063	-0.428063	-0.428063	-0.428063	-0.428063
Vmn2r85	-0.906959	-0.906959	1.6024	0.608931	0.436889	0.514306	-0.906959	-0.906959	-0.906959	-0.906959	0.948261	1.33097
Gas2l1	-0.523417	-0.523417	2.30082	1.86828	-0.523417	-0.523417	-0.523417	-0.523417	-0.523417	-0.523417	-0.100138	0.11837
Ankrd36	-0.413535	-0.413535	2.67567	1.45968	-0.413535	-0.413535	-0.413535	-0.413535	-0.413535	-0.413535	-0.413535	-0.413535
Urgcp	-0.660161	-0.660161	1.74402	1.60156	-0.660161	-0.660161	-0.660161	-0.660161	-0.660161	-0.660161	0.838563	1.09714
Polm	-0.4273	-0.4273	2.2863	1.9867	-0.4273	-0.4273	-0.4273	-0.4273	-0.4273	-0.4273	-0.4273	-0.4273
Upp1	-0.427891	-0.427891	2.22482	2.05409	-0.427891	-0.427891	-0.427891	-0.427891	-0.427891	-0.427891	-0.427891	-0.427891
Ikzf1	-0.627321	-0.627321	2.06148	1.63947	-0.627321	-0.627321	-0.627321	-0.627321	-0.627321	-0.627321	0.506945	0.810665
Sertad2	-1.14201	-1.14201	1.5976	0.888377	1.32145	0.266176	-1.14201	-1.14201	0.702641	0.19779	-0.134575	-0.271397
Lgalsl	-0.875969	-0.875969	1.43405	1.37907	1.41633	0.570804	-0.875969	-0.875969	-0.875969	-0.875969	0.194661	0.260908
Ugp2	-0.641122	-0.641122	1.91636	1.09794	0.510587	1.60408	-0.641122	-0.641122	-0.641122	-0.641122	-0.641122	-0.641122
Commd1	-0.42761	-0.42761	2.25839	2.01772	-0.42761	-0.42761	-0.42761	-0.42761	-0.42761	-0.42761	-0.42761	-0.42761
Rel	-0.877514	-0.877514	1.63873	1.44671	0.620794	0.00860284	-0.877514	-0.877514	-0.877514	-0.877514	0.690539	0.859707
Ccdc88a	-0.851423	-0.851423	1.73671	1.65893	0.233314	0.30071	-0.851423	-0.851423	-0.851423	-0.851423	0.443599	0.735279
Pttg1	-0.861579	-0.861579	1.88778	1.29699	0.470679	0.94469	-0.861579	-0.861579	-0.861579	-0.861579	0.174807	0.394523
Clint1	-0.890303	-0.890303	1.58578	1.46306	0.29395	0.337916	-0.890303	-0.890303	-0.890303	-0.890303	0.896481	0.764636
Olfr1396	-0.629183	-0.629183	2.18571	1.43055	0.658582	0.75862	-0.629183	-0.629183	-0.629183	-0.629183	-0.629183	-0.629183
Gfpt2	-0.857376	-0.857376	1.68209	1.48602	0.510515	1.09771	-0.857376	-0.857376	0.280107	0.0878122	-0.857376	-0.857376
Tbc1d9b	-0.855407	-0.855407	1.58692	1.50461	0.697516	1.14294	-0.855407	-0.855407	-0.855407	-0.855407	0.185663	0.0147977
Rufy1	-0.655375	-0.655375	1.95475	1.32757	1.151	0.809684	-0.655375	-0.655375	-0.655375	-0.655375	-0.655375	-0.655375
Jade2	-0.428162	-0.428162	2.15894	2.12268	-0.428162	-0.428162	-0.428162	-0.428162	-0.428162	-0.428162	-0.428162	-0.428162
Ube2b	-0.864805	-0.864805	1.57566	1.39075	1.27025	0.519789	-0.864805	-0.864805	-0.864805	-0.864805	0.459704	-0.0273187
Vdac1	-1.15662	-1.15662	1.36987	1.36919	0.752958	0.931813	0.229105	-0.434407	-1.15662	-1.15662	-0.0588148	0.46675
Hspa4	-0.764636	-0.764636	2.0349	1.75515	0.289111	0.194468	-0.764636	-0.764636	-0.764636	-0.764636	-0.0663585	0.380544
Slc22a5	-0.862767	-0.862767	1.56927	1.50028	1.08511	0.783601	-0.862767	-0.862767	-0.862767	-0.862767	0.133729	0.104603
Csf2	-0.64644	-0.64644	1.96768	1.55872	-0.64644	-0.64644	-0.64644	-0.64644	-0.64644	-0.64644	0.856677	0.788447
Tnip1	-0.940345	-0.940345	1.34818	1.10131	0.52933	0.987386	-0.940345	-0.940345	-0.940345	-0.940345	0.789611	0.886258
Cnot8	-0.428109	-0.428109	2.18154	2.09955	-0.428109	-0.428109	-0.428109	-0.428109	-0.428109	-0.428109	-0.428109	-0.428109
Cops3	-0.42775	-0.42775	2.24315	2.03435	-0.42775	-0.42775	-0.42775	-0.42775	-0.42775	-0.42775	-0.42775	-0.42775
Rai1	-0.57799	-0.57799	2.27783	1.66477	-0.57799	-0.57799	-0.57799	-0.57799	-0.57799	-0.57799	0.0805074	0.600817
Flii	-0.654576	-0.654576	2.0343	1.1267	0.965848	1.10975	-0.654576	-0.654576	-0.654576	-0.654576	-0.654576	-0.654576
Aldh3a1	-0.428164	-0.428164	2.15752	2.12412	-0.428164	-0.428164	-0.428164	-0.428164	-0.428164	-0.428164	-0.428164	-0.428164
Slc5a10	-0.428026	-0.428026	2.2019	2.07836	-0.428026	-0.428026	-0.428026	-0.428026	-0.428026	-0.428026	-0.428026	-0.428026
Alox12e	-0.921179	-0.921179	1.36534	1.18682	1.1325	0.909539	-0.921179	-0.921179	-0.921179	-0.921179	0.253204	0.679668
Gm40193	-0.59618	-0.59618	2.0496	1.72701	-0.59618	-0.59618	-0.59618	-0.59618	-0.59618	-0.59618	0.00638507	0.986442
Scimp	-0.650406	-0.650406	1.68357	1.37178	1.6184	0.52949	-0.650406	-0.650406	-0.650406	-0.650406	-0.650406	-0.650406
Dhx33	-0.903174	-0.903174	1.51078	1.40233	1.03531	0.675522	-0.903174	-0.903174	-0.903174	-0.903174	0.476239	0.318868
6330403K07Rik	-0.675182	-0.675182	1.49562	1.44556	1.23409	1.22619	-0.675182	-0.675182	-0.675182	-0.675182	-0.675182	-0.675182
Med31	-0.427942	-0.427942	2.21704	2.06237	-0.427942	-0.427942	-0.427942	-0.427942	-0.427942	-0.427942	-0.427942	-0.427942
Trpv3	-0.634054	-0.634054	2.13074	1.36737	1.04679	0.527536	-0.634054	-0.634054	-0.634054	-0.634054	-0.634054	-0.634054
Mnt	-1.24928	-1.24928	1.41608	0.837104	-1.24928	-1.24928	0.560806	0.496611	0.813007	0.245333	0.848696	-0.220526
Dph1	-0.843174	-0.843174	1.62005	1.61903	1.06071	0.583449	-0.843174	-0.843174	-0.843174	-0.843174	0.149345	0.026458
Rpa1	-0.899891	-0.899891	1.60295	1.50084	0.581088	0.59109	-0.899891	-0.899891	-0.899891	-0.899891	0.537502	0.585879
Serpinf2	-0.657518	-0.657518	1.94043	1.177	1.28948	0.853223	-0.657518	-0.657518	-0.657518	-0.657518	-0.657518	-0.657518
Rph3al	-0.672006	-0.672006	1.57901	1.50315	-0.672006	-0.672006	-0.672006	-0.672006	-0.672006	-0.672006	1.18921	1.10468
Mrm3	-0.426186	-0.426186	2.35666	1.90521	-0.426186	-0.426186	-0.426186	-0.426186	-0.426186	-0.426186	-0.426186	-0.426186
Gosr1	-0.886529	-0.886529	1.62143	1.5567	0.699207	0.601887	-0.886529	-0.886529	-0.886529	-0.886529	0.301376	0.538571
Tmigd1	-0.826677	-0.826677	1.48335	1.37872	1.12864	1.22157	-0.826677	-0.826677	-0.826677	-0.826677	-0.109596	-0.142627
Blmh	-0.819231	-0.819231	1.7449	1.402	1.27078	0.548041	-0.819231	-0.819231	-0.819231	-0.819231	-0.177497	0.127167
Git1	-0.428169	-0.428169	2.15266	2.12903	-0.428169	-0.428169	-0.428169	-0.428169	-0.428169	-0.428169	-0.428169	-0.428169
Trp53i13	-0.825841	-0.825841	1.69909	0.390618	1.39336	1.18838	-0.825841	-0.825841	-0.825841	-0.825841	-0.345291	0.628892
Nufip2	-0.796811	-0.796811	2.09668	1.15866	0.988004	0.664186	-0.796811	-0.796811	-0.796811	-0.796811	-0.178819	0.0521525
Slc46a1	-0.421498	-0.421498	2.52003	1.69494	-0.421498	-0.421498	-0.421498	-0.421498	-0.421498	-0.421498	-0.421498	-0.421498
Evi2a	-0.428108	-0.428108	2.18175	2.09934	-0.428108	-0.428108	-0.428108	-0.428108	-0.428108	-0.428108	-0.428108	-0.428108
Utp6	-0.83726	-0.83726	1.8512	1.64269	0.604618	0.27266	-0.83726	-0.83726	-0.83726	-0.83726	0.237073	0.41532
Zfp830	-0.426813	-0.426813	2.32093	1.9472	-0.426813	-0.426813	-0.426813	-0.426813	-0.426813	-0.426813	-0.426813	-0.426813
Unc45b	-0.42396	-0.42396	2.44805	1.79155	-0.42396	-0.42396	-0.42396	-0.42396	-0.42396	-0.42396	-0.42396	-0.42396
Ccl6	-0.672492	-0.672492	1.53105	1.51434	1.06819	1.26635	-0.672492	-0.672492	-0.672492	-0.672492	-0.672492	-0.672492
Car4	-0.828571	-0.828571	1.62309	1.54112	-0.0381463	-0.0042218	-0.828571	-0.828571	-0.828571	-0.828571	0.642482	1.2071
Rps6kb1	-0.425754	-0.425754	2.37778	1.87976	-0.425754	-0.425754	-0.425754	-0.425754	-0.425754	-0.425754	-0.425754	-0.425754
Rad51c	-0.688667	-0.688667	2.10365	1.91195	-0.125343	-0.0770993	-0.688667	-0.688667	-0.688667	-0.688667	0.136578	0.18227
Supt4a	-0.424784	-0.424784	2.41847	1.82937	-0.424784	-0.424784	-0.424784	-0.424784	-0.424784	-0.424784	-0.424784	-0.424784
Vezf1	-0.427705	-0.427705	2.24826	2.02879	-0.427705	-0.427705	-0.427705	-0.427705	-0.427705	-0.427705	-0.427705	-0.427705
Akap1	-0.935021	-0.935021	1.28388	1.20047	-0.935021	-0.935021	-0.935021	-0.935021	0.928971	0.406039	0.765633	1.02513
Trim25	-0.649721	-0.649721	1.91237	1.52584	1.09135	0.668199	-0.649721	-0.649721	-0.649721	-0.649721	-0.649721	-0.649721
Utp18	-0.878952	-0.878952	1.64276	1.58123	0.551967	0.232579	-0.878952	-0.878952	-0.878952	-0.878952	0.575024	0.690161
Tob1	-0.427999	-0.427999	2.20705	2.07294	-0.427999	-0.427999	-0.427999	-0.427999	-0.427999	-0.427999	-0.427999	-0.427999
Cdk5rap3	-0.427705	-0.427705	2.24826	2.02879	-0.427705	-0.427705	-0.427705	-0.427705	-0.427705	-0.427705	-0.427705	-0.427705
Pgap3	-0.842125	-0.842125	1.6978	1.08939	0.897397	1.28541	-0.842125	-0.842125	-0.842125	-0.842125	-0.286206	0.36895
Csf3	-0.825288	-0.825288	1.81165	1.53635	0.879084	0.703905	-0.825288	-0.825288	-0.825288	-0.825288	0.0454553	-0.0247136
Eif1	-0.421735	-0.421735	2.51388	1.70347	-0.421735	-0.421735	-0.421735	-0.421735	-0.421735	-0.421735	-0.421735	-0.421735
Zfp385c	-0.744806	-0.744806	2.192	1.6094	-0.744806	-0.744806	0.490542	0.179398	-0.0444223	0.0419169	-0.744806	-0.744806
Dhx58	-0.642399	-0.642399	1.94766	1.61009	0.967271	0.614174	-0.642399	-0.642399	-0.642399	-0.642399	-0.642399	-0.642399
Hsd17b1	-0.876269	-0.876269	1.54687	1.38829	1.18964	0.726863	-0.876269	-0.876269	-0.876269	-0.876269	0.0500467	0.355897
Rnd2	-1.0306	-1.0306	2.36878	0.636712	0.332422	0.598914	0.376816	0.0662057	-1.0306	-1.0306	-0.336344	0.0789058
Tmem106a	-0.427705	-0.427705	2.24826	2.02879	-0.427705	-0.427705	-0.427705	-0.427705	-0.427705	-0.427705	-0.427705	-0.427705
Adam11	-0.903982	-0.903982	1.45715	1.10868	1.26494	0.96989	-0.903982	-0.903982	-0.903982	-0.903982	0.24277	0.380464
Hexim1	-0.870991	-0.870991	1.48296	1.17617	0.846461	1.24603	-0.870991	-0.870991	-0.870991	-0.870991	-0.25483	0.729145
Nsf	-0.866989	-0.866989	1.59984	1.3548	1.11918	0.879808	-0.866989	-0.866989	-0.866989	-0.866989	-0.0129254	0.261237
Mettl2	-0.70368	-0.70368	2.12496	1.61389	0.818477	0.246395	-0.70368	-0.70368	-0.70368	-0.70368	-0.358558	-0.223076
Ccdc47	-0.607149	-0.607149	2.19897	1.63857	-0.607149	-0.607149	-0.607149	-0.607149	-0.607149	-0.607149	0.436557	0.58309
Kpna2	-0.880255	-0.880255	1.65014	1.48876	-0.880255	-0.880255	-0.880255	-0.880255	0.881956	0.603642	0.164985	0.492055
Dnaic2	-0.669191	-0.669191	1.76118	1.16059	-0.669191	-0.669191	-0.669191	-0.669191	1.13832	1.29343	-0.669191	-0.669191
Nup85	-0.409013	-0.409013	2.73879	1.35134	-0.409013	-0.409013	-0.409013	-0.409013	-0.409013	-0.409013	-0.409013	-0.409013
Unc13d	-0.599883	-0.599883	2.24464	1.60588	-0.599883	-0.599883	-0.599883	-0.599883	-0.599883	-0.599883	0.309922	0.638624
Evpl	-0.835851	-0.835851	1.9162	0.868312	1.18222	0.986886	-0.835851	-0.835851	-0.835851	-0.835851	0.0971978	-0.035716
Baiap2	-0.649431	-0.649431	1.79938	1.72579	-0.649431	-0.649431	-0.649431	-0.649431	-0.649431	-0.649431	0.748918	0.921357
Mrpl12	-0.422062	-0.422062	2.50517	1.71545	-0.422062	-0.422062	-0.422062	-0.422062	-0.422062	-0.422062	-0.422062	-0.422062
Anapc11	-0.665326	-0.665326	1.81348	1.10451	1.37403	1.03058	-0.665326	-0.665326	-0.665326	-0.665326	-0.665326	-0.665326
Narf	-0.887156	-0.887156	1.49863	1.03772	0.879067	1.42293	-0.887156	-0.887156	-0.887156	-0.887156	0.100771	0.383809
Ptrhd1	-0.767825	-0.767825	1.85391	1.69083	0.915423	0.48785	-0.767825	-0.767825	-0.767825	-0.767825	-0.0427944	-0.298267
Itsn2	-0.417977	-0.417977	2.59866	1.58111	-0.417977	-0.417977	-0.417977	-0.417977	-0.417977	-0.417977	-0.417977	-0.417977
Klhl29	-0.675022	-0.675022	1.47492	1.45523	1.16026	1.30977	-0.675022	-0.675022	-0.675022	-0.675022	-0.675022	-0.675022
Apob	-0.896481	-0.896481	1.53254	1.15701	0.252656	0.293711	-0.896481	-0.896481	-0.896481	-0.896481	0.9226	1.22037
Kcns3	-0.657493	-0.657493	1.7587	1.32852	-0.657493	-0.657493	-0.657493	-0.657493	-0.657493	-0.657493	0.684317	1.48841
Msgn1	-0.427445	-0.427445	2.27402	2.00043	-0.427445	-0.427445	-0.427445	-0.427445	-0.427445	-0.427445	-0.427445	-0.427445
Gen1	-0.649271	-0.649271	1.89841	1.61402	0.888045	0.793696	-0.649271	-0.649271	-0.649271	-0.649271	-0.649271	-0.649271
Rock2	-0.662078	-0.662078	1.74569	1.56619	1.10015	0.884587	-0.662078	-0.662078	-0.662078	-0.662078	-0.662078	-0.662078
Taf1b	-0.884834	-0.884834	1.45108	1.33344	1.07393	1.07746	-0.884834	-0.884834	-0.884834	-0.884834	0.318627	0.0544769
Cys1	-0.66631	-0.66631	1.5932	1.33218	1.55112	0.853977	-0.66631	-0.66631	-0.66631	-0.66631	-0.66631	-0.66631
Colec11	-0.638022	-0.638022	2.19695	1.22088	0.890061	0.796279	-0.638022	-0.638022	-0.638022	-0.638022	-0.638022	-0.638022
Fam110c	-0.578595	-0.578595	2.42728	1.45127	0.229277	0.520926	-0.578595	-0.578595	-0.578595	-0.578595	-0.578595	-0.578595
Cbll1	-0.653455	-0.653455	1.73557	1.49017	-0.653455	-0.653455	-0.653455	-0.653455	-0.653455	-0.653455	0.5842	1.4177
Efcab10	-0.65417	-0.65417	1.67749	1.64643	1.29297	0.616474	-0.65417	-0.65417	-0.65417	-0.65417	-0.65417	-0.65417
Zfp277	-0.882427	-0.882427	1.44457	1.23376	1.43131	0.477893	-0.882427	-0.882427	-0.882427	-0.882427	0.663346	0.0436727
Strn3	-0.547482	-0.547482	2.14861	1.97719	-0.547482	-0.547482	-0.547482	-0.547482	-0.547482	-0.547482	-0.0213228	0.275376
Prps1l3	-0.914329	-0.914329	1.66149	1.15126	-0.914329	-0.914329	-0.914329	-0.914329	0.668784	0.396538	0.825022	0.782879
Foxa1	-1.18778	-1.18778	1.59214	0.965744	1.03379	0.331086	-1.18778	-1.18778	-0.246992	-0.0613359	0.56472	0.57197
Rpl36al	-0.935042	-0.935042	1.41214	0.888146	1.07029	1.0661	-0.935042	-0.935042	-0.935042	-0.935042	0.570898	0.60268
Trim9	-0.924791	-0.924791	1.53506	0.960617	1.11344	0.831107	-0.924791	-0.924791	-0.924791	-0.924791	0.703401	0.405117
Dact1	-0.661277	-0.661277	1.57402	1.49667	1.51037	0.709153	-0.661277	-0.661277	-0.661277	-0.661277	-0.661277	-0.661277
Slc38a6	-0.578948	-0.578948	2.37157	1.56606	-0.578948	-0.578948	-0.578948	-0.578948	-0.578948	-0.578948	0.325865	0.368087
Syne2	-0.928393	-0.928393	1.49488	1.06798	0.54264	1.11717	-0.928393	-0.928393	-0.928393	-0.928393	0.637633	0.710063
Susd6	-0.678683	-0.678683	2.01969	1.94786	-0.223151	-0.238345	-0.678683	-0.678683	-0.678683	-0.678683	0.0636572	0.50239
Dcaf4	-0.426458	-0.426458	2.34209	1.92249	-0.426458	-0.426458	-0.426458	-0.426458	-0.426458	-0.426458	-0.426458	-0.426458
Acot1	-0.626656	-0.626656	2.02721	1.71211	0.691991	0.581939	-0.626656	-0.626656	-0.626656	-0.626656	-0.626656	-0.626656
Npc2	-0.42816	-0.42816	2.16001	2.12159	-0.42816	-0.42816	-0.42816	-0.42816	-0.42816	-0.42816	-0.42816	-0.42816
Arel1	-0.765382	-0.765382	2.27155	0.86087	0.171568	1.22495	-0.765382	-0.765382	-0.765382	-0.765382	0.193171	-0.129814
Ylpm1	-0.505517	-0.505517	2.22575	1.99608	-0.505517	-0.505517	-0.505517	-0.505517	-0.505517	-0.505517	-0.116485	-0.0612091
Ift43	-0.42782	-0.42782	2.23454	2.04365	-0.42782	-0.42782	-0.42782	-0.42782	-0.42782	-0.42782	-0.42782	-0.42782
Gstz1	-0.662105	-0.662105	1.72276	1.60825	-0.662105	-0.662105	-0.662105	-0.662105	-0.662105	-0.662105	0.926653	1.03918
Efcab11	-1.28508	-1.28508	1.16558	0.775368	0.910625	0.348598	0.9038	0.799103	-1.28508	-1.28508	0.126889	0.110369
Tc2n	-1.31658	-1.31658	1.05241	0.936344	0.57634	0.422762	0.556552	0.15124	-1.31658	-1.31658	0.734282	0.836372
Lgmn	-0.700098	-0.700098	2.38849	1.51575	0.169947	-0.0564682	-0.700098	-0.700098	-0.700098	-0.700098	0.0281843	0.154683
Tmem251	-0.804681	-0.804681	1.85434	1.72407	0.760865	0.328906	-0.804681	-0.804681	-0.804681	-0.804681	0.124904	0.0349991
Gon7	-0.415318	-0.415318	2.64697	1.50621	-0.415318	-0.415318	-0.415318	-0.415318	-0.415318	-0.415318	-0.415318	-0.415318
Otub2	-0.428146	-0.428146	2.16775	2.11371	-0.428146	-0.428146	-0.428146	-0.428146	-0.428146	-0.428146	-0.428146	-0.428146
Gsc	-0.79446	-0.79446	1.92059	1.24964	-0.0979581	-0.247877	-0.79446	-0.79446	-0.79446	-0.79446	0.919713	1.02265
Vrk1	-0.875103	-0.875103	1.50258	1.43766	1.30838	0.33762	-0.875103	-0.875103	-0.875103	-0.875103	0.462574	0.201799
Mark3	-0.854479	-0.854479	1.92571	1.23679	1.04669	0.362591	-0.854479	-0.854479	-0.854479	-0.854479	0.270586	0.284511
Ckb	-0.821914	-0.821914	1.80447	1.78496	0.415907	0.1508	-0.821914	-0.821914	-0.821914	-0.821914	0.451966	0.323385
Gpr137b	-0.972525	-0.972525	1.85807	1.75513	0.252472	0.366066	-0.972525	-0.972525	-0.201352	-0.569432	0.0936647	0.335478
Hist1h4n	-0.428088	-0.428088	2.18767	2.0932	-0.428088	-0.428088	-0.428088	-0.428088	-0.428088	-0.428088	-0.428088	-0.428088
D130043K22Rik	-0.66697	-0.66697	1.7072	1.06978	-0.66697	-0.66697	-0.66697	-0.66697	-0.66697	-0.66697	1.51237	1.04641
Mylk4	-0.94417	-0.94417	1.25423	1.02128	0.709698	1.19558	-0.94417	-0.94417	0.759456	0.724774	-0.94417	-0.94417
Lyrm4	-0.894543	-0.894543	1.65946	1.30591	0.823624	0.780805	-0.894543	-0.894543	-0.894543	-0.894543	0.140301	0.657156
Riok1	-0.889274	-0.889274	1.51179	1.09446	1.40322	0.801428	-0.889274	-0.889274	-0.889274	-0.889274	0.155596	0.369146
Mak	-0.744481	-0.744481	1.9391	1.9067	0.390973	0.321288	-0.744481	-0.744481	-0.744481	-0.744481	-0.142038	0.0508556
Kif13a	-0.953034	-0.953034	1.1105	0.984645	0.704429	1.03486	-0.953034	-0.953034	-0.953034	-0.953034	0.886356	0.997415
Phf2	-1.30408	-1.30408	2.14759	1.37403	-0.342322	-0.0104734	0.0197459	-0.36697	-0.0645897	0.684426	-0.301479	-0.531791
Susd3	-0.889725	-0.889725	1.58585	1.26446	1.20559	0.694973	-0.889725	-0.889725	-0.889725	-0.889725	0.176348	0.411125
Nol8	-0.822484	-0.822484	1.796	0.832034	1.50334	0.856806	-0.822484	-0.822484	-0.822484	-0.822484	-0.144219	0.0909457
Spin1	-0.655187	-0.655187	1.80133	1.64204	0.962799	0.835331	-0.655187	-0.655187	-0.655187	-0.655187	-0.655187	-0.655187
Ror2	-0.870485	-0.870485	1.89764	1.37205	0.473034	0.390579	-0.870485	-0.870485	-0.870485	-0.870485	0.539601	0.550009
Thoc3	-0.593097	-0.593097	2.10112	1.83893	-0.593097	-0.593097	-0.593097	-0.593097	-0.593097	-0.593097	0.221098	0.583622
Mxd3	-0.649495	-0.649495	1.83461	1.51264	1.28666	0.562054	-0.649495	-0.649495	-0.649495	-0.649495	-0.649495	-0.649495
Dbn1	-0.888651	-0.888651	1.4863	1.24513	1.37596	0.627014	-0.888651	-0.888651	-0.888651	-0.888651	0.161958	0.435534
Slc25a48	-0.424284	-0.424284	2.43683	1.80601	-0.424284	-0.424284	-0.424284	-0.424284	-0.424284	-0.424284	-0.424284	-0.424284
Zfp934	-0.92747	-0.92747	1.31698	0.777667	-0.92747	-0.92747	-0.92747	-0.92747	1.09573	1.22829	0.831367	0.314782
Zfp367	-0.428146	-0.428146	2.16775	2.11371	-0.428146	-0.428146	-0.428146	-0.428146	-0.428146	-0.428146	-0.428146	-0.428146
Cntnap3	-0.428173	-0.428173	2.14587	2.13586	-0.428173	-0.428173	-0.428173	-0.428173	-0.428173	-0.428173	-0.428173	-0.428173
Ptdss1	-0.891063	-0.891063	1.64165	0.920268	1.36416	0.159263	-0.891063	-0.891063	-0.891063	-0.891063	0.550713	0.710326
Zfp759	-0.868915	-0.868915	1.82379	1.10858	0.694983	1.15185	-0.868915	-0.868915	-0.868915	-0.868915	0.290268	0.144014
Rps23	-0.796206	-0.796206	1.77978	1.75685	0.8562	0.454595	-0.796206	-0.796206	-0.796206	-0.796206	-0.035653	-0.0345365
Ssbp2	-0.409316	-0.409316	2.73492	1.35823	-0.409316	-0.409316	-0.409316	-0.409316	-0.409316	-0.409316	-0.409316	-0.409316
Msh3	-0.661304	-0.661304	1.93458	1.15729	1.13568	1.06288	-0.661304	-0.661304	-0.661304	-0.661304	-0.661304	-0.661304
Thbs4	-0.743769	-0.743769	1.93995	1.69317	0.932639	0.30879	-0.743769	-0.743769	-0.743769	-0.743769	-0.188643	-0.22329
Tmem174	-0.641886	-0.641886	2.16525	1.19642	-0.641886	-0.641886	-0.641886	-0.641886	-0.641886	-0.641886	0.810523	0.962896
Bdp1	-0.640798	-0.640798	2.18656	0.791766	1.07636	1.07171	-0.640798	-0.640798	-0.640798	-0.640798	-0.640798	-0.640798
Cdk7	-0.835942	-0.835942	1.97214	1.31061	0.116003	0.103402	-0.835942	-0.835942	-0.835942	-0.835942	0.632868	0.880632
Nln	-0.921278	-0.921278	1.64276	1.09622	0.776384	0.629128	-0.921278	-0.921278	-0.921278	-0.921278	0.530387	0.852789
Map3k1	-0.666976	-0.666976	1.68748	1.53941	1.05343	1.0555	-0.666976	-0.666976	-0.666976	-0.666976	-0.666976	-0.666976
Gpx8	-0.422273	-0.422273	2.49938	1.72335	-0.422273	-0.422273	-0.422273	-0.422273	-0.422273	-0.422273	-0.422273	-0.422273
Fezf2	-0.873057	-0.873057	1.68466	1.22917	0.517772	-0.0245015	-0.873057	-0.873057	-0.873057	-0.873057	0.658449	1.1728
Slc4a7	-0.652045	-0.652045	1.97976	1.43231	-0.652045	-0.652045	-0.652045	-0.652045	-0.652045	-0.652045	0.901192	0.903105
Ube2e1	-0.886531	-0.886531	1.46478	1.32825	1.33655	0.527006	-0.886531	-0.886531	-0.886531	-0.886531	0.544494	0.118098
Cfap70	-0.570087	-0.570087	2.45172	1.47814	-0.570087	-0.570087	-0.570087	-0.570087	-0.570087	-0.570087	0.366465	0.264377
Dupd1	-0.898681	-0.898681	1.7511	1.23361	0.854611	0.474788	-0.898681	-0.898681	-0.898681	-0.898681	0.417983	0.659997
Chdh	-1.06993	-1.06993	1.43407	1.3049	1.2672	0.455791	-1.06993	-1.06993	-0.428832	-0.569563	0.349843	0.466302
Sfmbt1	-0.650434	-0.650434	1.75781	0.965105	1.74898	0.731572	-0.650434	-0.650434	-0.650434	-0.650434	-0.650434	-0.650434
Stab1	-0.604648	-0.604648	2.15779	1.68513	0.703555	0.290707	-0.604648	-0.604648	-0.604648	-0.604648	-0.604648	-0.604648
Btd	-0.890786	-0.890786	1.42495	1.23503	1.3976	0.77311	-0.890786	-0.890786	-0.890786	-0.890786	0.248917	0.265117
Glud1	-0.632863	-0.632863	1.99269	1.68809	-0.632863	-0.632863	-0.632863	-0.632863	-0.632863	-0.632863	0.791809	0.590315
Mmrn2	-0.427061	-0.427061	2.3043	1.96632	-0.427061	-0.427061	-0.427061	-0.427061	-0.427061	-0.427061	-0.427061	-0.427061
Bmpr1a	-0.781055	-0.781055	1.72077	1.48747	1.39773	0.401163	-0.781055	-0.781055	-0.781055	-0.781055	-0.155227	-0.165579
Nrg3	-0.673911	-0.673911	1.57414	1.17022	1.41377	1.23316	-0.673911	-0.673911	-0.673911	-0.673911	-0.673911	-0.673911
Mbl1	-0.555179	-0.555179	2.45484	1.53976	-0.555179	-0.555179	-0.555179	-0.555179	-0.555179	-0.555179	0.0869127	0.359919
Gm2832	-0.66267	-0.66267	1.84642	1.38471	-0.66267	-0.66267	-0.66267	-0.66267	-0.66267	-0.66267	1.12824	0.941986
Gm5798	-0.639061	-0.639061	1.97212	1.51154	0.473639	1.15518	-0.639061	-0.639061	-0.639061	-0.639061	-0.639061	-0.639061
Gm8005	-0.67071	-0.67071	1.60122	1.52744	1.15066	1.08636	-0.67071	-0.67071	-0.67071	-0.67071	-0.67071	-0.67071
Gm8020	-0.644959	-0.644959	1.67922	1.45474	1.59785	0.427864	-0.644959	-0.644959	-0.644959	-0.644959	-0.644959	-0.644959
Gm17124	-0.631382	-0.631382	1.97957	1.72856	0.70703	0.635908	-0.631382	-0.631382	-0.631382	-0.631382	-0.631382	-0.631382
Gm8267	-0.67836	-0.67836	2.00091	1.94298	0.362336	0.375839	-0.67836	-0.67836	-0.67836	-0.67836	-0.320398	-0.291504
Txndc16	-0.892121	-0.892121	1.41342	1.38925	1.24325	0.717903	-0.892121	-0.892121	-0.892121	-0.892121	0.117696	0.471203
Fermt2	-0.777385	-0.777385	1.97906	1.7057	0.608044	0.339264	-0.777385	-0.777385	-0.777385	-0.777385	-0.160808	0.193048
Fbxo34	-0.901213	-0.901213	1.53242	1.31048	1.00508	0.647731	-0.901213	-0.901213	-0.901213	-0.901213	0.784425	0.127148
Sall2	-0.427948	-0.427948	2.21594	2.06354	-0.427948	-0.427948	-0.427948	-0.427948	-0.427948	-0.427948	-0.427948	-0.427948
Slc7a7	-0.706921	-0.706921	1.83726	1.81796	1.08464	0.0368683	-0.706921	-0.706921	-0.706921	-0.706921	-0.272327	-0.262875
Homez	-0.427911	-0.427911	2.22177	2.05734	-0.427911	-0.427911	-0.427911	-0.427911	-0.427911	-0.427911	-0.427911	-0.427911
Tm9sf1	-0.427888	-0.427888	2.22526	2.05362	-0.427888	-0.427888	-0.427888	-0.427888	-0.427888	-0.427888	-0.427888	-0.427888
Sdr39u1	-0.425301	-0.425301	2.39776	1.85525	-0.425301	-0.425301	-0.425301	-0.425301	-0.425301	-0.425301	-0.425301	-0.425301
Zmym5	-0.669376	-0.669376	1.65674	1.40903	1.32494	0.964298	-0.669376	-0.669376	-0.669376	-0.669376	-0.669376	-0.669376
Phf11c	-0.643167	-0.643167	1.93181	0.769672	1.65793	0.785923	-0.643167	-0.643167	-0.643167	-0.643167	-0.643167	-0.643167
Mipep	-0.76739	-0.76739	1.77031	1.64846	1.13361	0.480612	-0.76739	-0.76739	-0.76739	-0.76739	-0.153874	-0.274786
Arl11	-0.77852	-0.77852	1.89856	1.77644	0.489962	0.580353	-0.77852	-0.77852	-0.77852	-0.77852	-0.145562	0.0713653
Gucy1b2	-0.42679	-0.42679	2.3224	1.9455	-0.42679	-0.42679	-0.42679	-0.42679	-0.42679	-0.42679	-0.42679	-0.42679
Tdh	-0.42668	-0.42668	2.32916	1.93764	-0.42668	-0.42668	-0.42668	-0.42668	-0.42668	-0.42668	-0.42668	-0.42668
Mtmr9	-0.424893	-0.424893	2.41427	1.83466	-0.424893	-0.424893	-0.424893	-0.424893	-0.424893	-0.424893	-0.424893	-0.424893
Gulo	-1.26829	-1.26829	1.18655	0.276971	0.863715	0.0016766	-1.26829	-1.26829	0.7944	0.524971	0.257809	1.16706
Ephx2	-0.901348	-0.901348	1.47179	1.00484	1.15062	0.400758	-0.901348	-0.901348	-0.901348	-0.901348	1.19636	0.183722
Sorbs3	-0.421748	-0.421748	2.51353	1.70395	-0.421748	-0.421748	-0.421748	-0.421748	-0.421748	-0.421748	-0.421748	-0.421748
Lgi3	-0.428011	-0.428011	2.20486	2.07525	-0.428011	-0.428011	-0.428011	-0.428011	-0.428011	-0.428011	-0.428011	-0.428011
Xpo7	-0.905881	-0.905881	1.64069	0.704201	1.14468	0.574667	-0.905881	-0.905881	1.07801	0.293035	-0.905881	-0.905881
Slc25a30	-0.879019	-0.879019	1.61473	0.404884	0.493887	0.20692	-0.879019	-0.879019	-0.879019	-0.879019	1.42727	1.12642
Tsc22d1	-1.01621	-1.01621	1.56225	1.30561	-0.189427	-0.251581	-1.01621	-1.01621	-0.134723	-0.425096	1.17234	1.02549
Epsti1	-0.909482	-0.909482	2.04343	1.72841	0.576422	0.0990009	-0.909482	-0.909482	-0.0846801	-0.242914	-0.195677	-0.286063
Kbtbd6	-0.654234	-0.654234	1.82367	1.62044	1.00118	0.788593	-0.654234	-0.654234	-0.654234	-0.654234	-0.654234	-0.654234
Sugt1	-0.892478	-0.892478	1.79207	0.445791	1.28997	0.687796	-0.892478	-0.892478	-0.892478	-0.892478	0.680637	0.458609
Pcdh8	-0.650424	-0.650424	1.95595	1.46612	0.726661	1.05467	-0.650424	-0.650424	-0.650424	-0.650424	-0.650424	-0.650424
Pibf1	-0.819696	-0.819696	1.69832	1.55692	0.548583	1.16514	-0.819696	-0.819696	-0.819696	-0.819696	-0.00944798	-0.0413423
Cln5	-0.670078	-0.670078	1.71289	1.35506	1.21563	1.07706	-0.670078	-0.670078	-0.670078	-0.670078	-0.670078	-0.670078
Trim52	-0.613847	-0.613847	2.43765	1.73189	-0.447571	-0.40743	-0.211925	-0.229906	-0.613847	-0.613847	-0.206231	-0.211088
Abcc4	-0.827399	-0.827399	1.98346	1.82904	0.229814	-0.0145339	0.306506	0.157435	-0.827399	-0.827399	-0.827399	-0.354719
Ipo5	-0.7464	-0.7464	2.09341	1.70188	0.252863	-0.247176	-0.7464	-0.7464	-0.7464	-0.7464	0.44842	0.229001
Timm8a2	-0.661672	-0.661672	1.75872	1.57597	0.943848	1.01485	-0.661672	-0.661672	-0.661672	-0.661672	-0.661672	-0.661672
Ccdc152	-0.851606	-0.851606	1.87122	1.09655	0.974123	0.949954	-0.851606	-0.851606	-0.851606	-0.851606	0.295531	-0.0777415
Dab2	-1.24326	-1.24326	1.30153	0.764952	1.0638	0.983688	-1.24326	-1.24326	0.325992	-0.21981	0.356416	0.396456
Nadk2	-0.931192	-0.931192	1.50055	1.01614	0.641536	0.999231	-0.931192	-0.931192	-0.931192	-0.931192	0.513541	0.916153
Skp2	-0.747462	-0.747462	1.86051	1.55099	1.14963	0.520888	-0.747462	-0.747462	-0.747462	-0.747462	-0.367218	-0.230028
Agxt2	-0.427911	-0.427911	2.22177	2.05734	-0.427911	-0.427911	-0.427911	-0.427911	-0.427911	-0.427911	-0.427911	-0.427911
Dnajc21	-0.518002	-0.518002	2.38193	1.78258	-0.518002	-0.518002	-0.518002	-0.518002	-0.518002	-0.518002	-0.0419534	0.0214619
6030458C11Rik	-0.617544	-0.617544	2.09684	1.66814	-0.617544	-0.617544	-0.617544	-0.617544	-0.617544	-0.617544	0.389006	0.78637
Drosha	-0.558682	-0.558682	2.59522	1.25084	-0.558682	-0.558682	-0.558682	-0.558682	-0.558682	-0.558682	0.378544	0.244853
Sema5a	-1.22337	-1.22337	1.18219	0.353965	1.0617	0.662195	-1.22337	-1.22337	0.882133	0.999996	0.116318	-0.365028
Ywhaz	-0.547175	-0.547175	2.49376	1.50129	-0.547175	-0.547175	-0.547175	-0.547175	-0.547175	-0.547175	0.36295	0.0194091
Rad21	-0.633764	-0.633764	2.04461	1.17219	0.419255	1.43406	-0.633764	-0.633764	-0.633764	-0.633764	-0.633764	-0.633764
Ccn3	-0.845147	-0.845147	1.555	1.22215	1.54521	0.553071	-0.845147	-0.845147	-0.845147	-0.845147	-0.114448	0.309905
Tbc1d31	-0.805644	-0.805644	2.13514	0.647054	1.39908	0.178414	-0.805644	-0.805644	-0.805644	-0.805644	0.122119	0.352053
Fam91a1	-1.26012	-1.26012	1.27851	1.10111	1.05411	0.421191	-1.26012	-1.26012	0.613568	0.232306	0.280993	0.0586781
Ago2	-1.10739	-1.10739	2.08086	0.999075	0.504834	0.466419	-1.10739	-1.10739	-0.183227	0.130929	-0.0592163	0.489882
Slc45a4	-0.638669	-0.638669	2.17436	1.25503	-0.638669	-0.638669	-0.638669	-0.638669	-0.638669	-0.638669	0.733365	0.946593
Ptp4a3	-0.866222	-0.866222	1.67332	1.51685	1.00317	0.516866	-0.866222	-0.866222	-0.866222	-0.866222	0.293482	0.193646
Arhgap39	-0.649756	-0.649756	1.74796	1.14896	-0.649756	-0.649756	-0.649756	-0.649756	-0.649756	-0.649756	0.603085	1.69804
Apol6	-0.42718	-0.42718	2.29562	1.97618	-0.42718	-0.42718	-0.42718	-0.42718	-0.42718	-0.42718	-0.42718	-0.42718
Apol9b	-1.01081	-1.01081	1.60385	1.41137	1.29011	0.671812	-1.01081	-1.01081	-0.252959	-0.296942	-0.251705	-0.132272
Triobp	-0.421035	-0.421035	2.53167	1.67868	-0.421035	-0.421035	-0.421035	-0.421035	-0.421035	-0.421035	-0.421035	-0.421035
Maff	-0.426515	-0.426515	2.33885	1.9263	-0.426515	-0.426515	-0.426515	-0.426515	-0.426515	-0.426515	-0.426515	-0.426515
Cbx6	-0.927276	-0.927276	1.47214	0.504431	0.989617	0.520899	-0.927276	-0.927276	-0.927276	-0.927276	1.11752	0.959055
Tab1	-0.427131	-0.427131	2.29929	1.97202	-0.427131	-0.427131	-0.427131	-0.427131	-0.427131	-0.427131	-0.427131	-0.427131
Atf4	-0.41832	-0.41832	2.59185	1.59135	-0.41832	-0.41832	-0.41832	-0.41832	-0.41832	-0.41832	-0.41832	-0.41832
Adsl	-0.780306	-0.780306	2.06422	0.946699	1.36638	0.540963	-0.780306	-0.780306	-0.780306	-0.780306	-0.0871546	-0.149263
Sgsm3	-0.716929	-0.716929	2.01482	1.84581	-0.0461412	-0.124898	-0.716929	-0.716929	-0.716929	-0.716929	0.655688	-0.0436998
Slc25a17	-0.898868	-0.898868	1.64583	0.911686	0.568507	0.183311	-0.898868	-0.898868	-0.898868	-0.898868	0.836717	1.24716
Dnajb7	-0.404649	-0.404649	2.78991	1.25657	-0.404649	-0.404649	-0.404649	-0.404649	-0.404649	-0.404649	-0.404649	-0.404649
Chadl	-0.409792	-0.409792	2.72875	1.36917	-0.409792	-0.409792	-0.409792	-0.409792	-0.409792	-0.409792	-0.409792	-0.409792
Zc3h7b	-0.590436	-0.590436	2.14025	1.82865	-0.590436	-0.590436	-0.590436	-0.590436	-0.590436	-0.590436	0.406749	0.347837
Snu13	-0.771445	-0.771445	1.81887	1.78934	0.936882	0.042444	-0.771445	-0.771445	-0.771445	-0.771445	0.159881	-0.118749
Rrp7a	-0.427869	-0.427869	2.22793	2.05075	-0.427869	-0.427869	-0.427869	-0.427869	-0.427869	-0.427869	-0.427869	-0.427869
Pacsin2	-0.426616	-0.426616	2.333	1.93316	-0.426616	-0.426616	-0.426616	-0.426616	-0.426616	-0.426616	-0.426616	-0.426616
Fbln1	-0.775148	-0.775148	1.77568	1.76257	0.958364	0.42451	-0.775148	-0.775148	-0.775148	-0.775148	-0.137194	-0.133036
Tbc1d22a	-0.84175	-0.84175	1.87565	1.49809	0.278812	0.106017	-0.84175	-0.84175	-0.84175	-0.84175	0.468656	0.823279
Brd1	-0.689231	-0.689231	2.02082	1.93813	0.502832	0.00763	-0.689231	-0.689231	-0.689231	-0.689231	-0.189735	-0.144291
Alg12	-0.647009	-0.647009	2.02772	1.34215	1.13424	0.67196	-0.647009	-0.647009	-0.647009	-0.647009	-0.647009	-0.647009
Sco2	-0.428174	-0.428174	2.14115	2.1406	-0.428174	-0.428174	-0.428174	-0.428174	-0.428174	-0.428174	-0.428174	-0.428174
Kif21a	-0.543463	-0.543463	2.36333	1.73821	-0.543463	-0.543463	-0.543463	-0.543463	-0.543463	-0.543463	0.113453	0.132717
Mcrs1	-0.641471	-0.641471	2.06008	1.09774	-0.641471	-0.641471	-0.641471	-0.641471	-0.641471	-0.641471	0.592689	1.38125
Tmbim6	-0.939609	-0.939609	1.50171	0.744606	-0.939609	-0.939609	-0.939609	-0.939609	0.800912	0.868818	0.774284	0.947328
Aqp2	-0.667358	-0.667358	1.72134	1.46536	1.1498	1.00237	-0.667358	-0.667358	-0.667358	-0.667358	-0.667358	-0.667358
Krt18	-0.428077	-0.428077	2.19053	2.09023	-0.428077	-0.428077	-0.428077	-0.428077	-0.428077	-0.428077	-0.428077	-0.428077
Map3k12	-0.670808	-0.670808	1.72475	1.17359	1.20063	1.26749	-0.670808	-0.670808	-0.670808	-0.670808	-0.670808	-0.670808
Hoxc13	-0.42777	-0.42777	2.24076	2.03693	-0.42777	-0.42777	-0.42777	-0.42777	-0.42777	-0.42777	-0.42777	-0.42777
Gpr84	-0.775254	-0.775254	1.97617	1.48229	0.434586	1.02833	-0.775254	-0.775254	-0.775254	-0.775254	-0.0688621	-0.200988
Slx4	-0.916827	-0.916827	1.50276	0.987011	1.15425	1.01134	-0.916827	-0.916827	-0.916827	-0.916827	0.347105	0.498493
Srl	-0.875228	-0.875228	1.67993	1.59445	0.66733	0.537345	-0.875228	-0.875228	-0.875228	-0.875228	0.445826	0.326493
Dnaja3	-0.639529	-0.639529	2.01999	1.56075	0.895931	0.639559	-0.639529	-0.639529	-0.639529	-0.639529	-0.639529	-0.639529
Atf7ip2	-0.646039	-0.646039	1.76295	1.7096	-0.646039	-0.646039	-0.646039	-0.646039	-0.646039	-0.646039	1.15813	0.537624
Fopnl	-0.57881	-0.57881	2.12876	1.85105	-0.57881	-0.57881	-0.57881	-0.57881	-0.57881	-0.57881	0.0513479	0.599327
Dnm1l	-0.424714	-0.424714	2.42113	1.82601	-0.424714	-0.424714	-0.424714	-0.424714	-0.424714	-0.424714	-0.424714	-0.424714
Tmem191c	-0.949063	-0.949063	1.19986	0.905596	1.17678	0.764136	-0.949063	-0.949063	-0.949063	-0.949063	0.756046	0.891957
Ccdc188	-0.642617	-0.642617	1.90321	1.69442	-0.642617	-0.642617	-0.642617	-0.642617	-0.642617	-0.642617	0.693625	0.849683
Klhl24	-0.854708	-0.854708	1.98371	1.90153	0.296203	-0.134524	-0.854708	-0.854708	0.315022	-0.435221	-0.212123	-0.295768
Parl	-0.976056	-0.976056	2.24522	1.21851	0.208243	0.357883	-0.976056	-0.976056	-0.235802	-0.495969	0.361092	0.245042
Tra2b	-0.427874	-0.427874	2.22724	2.0515	-0.427874	-0.427874	-0.427874	-0.427874	-0.427874	-0.427874	-0.427874	-0.427874
Etv5	-0.740405	-0.740405	1.68282	1.34965	1.32754	0.954175	-0.740405	-0.740405	-0.740405	-0.740405	-0.483743	-0.38801
Masp1	-0.42506	-0.42506	2.40765	1.84295	-0.42506	-0.42506	-0.42506	-0.42506	-0.42506	-0.42506	-0.42506	-0.42506
Tmem44	-0.804992	-0.804992	2.03603	1.47486	0.228852	-0.0823577	-0.804992	-0.804992	-0.804992	-0.804992	0.43679	0.735781
Fam43a	-0.588069	-0.588069	2.22106	1.7328	-0.588069	-0.588069	-0.588069	-0.588069	-0.588069	-0.588069	0.464593	0.286103
Tnk2	-1.33179	-1.33179	1.04672	0.81699	-1.33179	-1.33179	0.672747	0.345103	0.754245	0.535988	0.731017	0.424332
Umps	-0.741381	-0.741381	2.32354	1.40881	0.438475	0.345556	-0.741381	-0.741381	-0.741381	-0.741381	-0.0817312	0.0136366
Ccdc14	-0.636836	-0.636836	2.11925	1.41455	0.930722	0.630162	-0.636836	-0.636836	-0.636836	-0.636836	-0.636836	-0.636836
Hspbap1	-0.502314	-0.502314	2.58206	1.52012	-0.502314	-0.502314	-0.502314	-0.502314	-0.502314	-0.502314	-0.0336011	-0.0500659
Eaf2	-0.609488	-0.609488	2.13712	1.69574	-0.609488	-0.609488	-0.609488	-0.609488	-0.609488	-0.609488	0.665432	0.377612
Tigit	-0.644088	-0.644088	2.0033	1.52446	-0.644088	-0.644088	-0.644088	-0.644088	-0.644088	-0.644088	0.921536	0.703408
Naa50	-0.424742	-0.424742	2.42006	1.82736	-0.424742	-0.424742	-0.424742	-0.424742	-0.424742	-0.424742	-0.424742	-0.424742
Crybg3	-0.626209	-0.626209	2.31743	1.11984	-0.626209	-0.626209	-0.626209	-0.626209	-0.626209	-0.626209	0.819	0.753399
Pros1	-1.04969	-1.04969	1.53435	1.12687	0.877727	0.307156	-1.04969	-1.04969	-0.463659	-0.766681	0.636382	0.946597
Cfap298	-0.669258	-0.669258	1.71994	1.36449	1.0321	1.23754	-0.669258	-0.669258	-0.669258	-0.669258	-0.669258	-0.669258
Dop1b	-0.619214	-0.619214	2.09824	1.68591	-0.619214	-0.619214	-0.619214	-0.619214	-0.619214	-0.619214	0.628203	0.541362
Ets2	-0.427871	-0.427871	2.22759	2.05112	-0.427871	-0.427871	-0.427871	-0.427871	-0.427871	-0.427871	-0.427871	-0.427871
C2cd2	-1.26569	-1.26569	1.24337	1.11812	0.334345	0.409435	-1.26569	-1.26569	0.954693	0.747557	0.210491	0.0447325
Dynlt1c	-0.869794	-0.869794	1.55497	1.10616	1.35819	0.966646	-0.869794	-0.869794	-0.869794	-0.869794	0.035632	0.197168
Gm3435	-0.820989	-0.820989	1.72444	0.322695	1.25085	1.48906	-0.820989	-0.820989	-0.820989	-0.820989	0.277355	-0.138469
Vmn2r90	-0.939369	-0.939369	1.31934	0.833358	0.532168	1.04732	-0.939369	-0.939369	-0.939369	-0.939369	1.14902	0.755011
Zfp229	-0.909312	-0.909312	1.58415	1.26601	1.01345	0.390891	-0.909312	-0.909312	-0.909312	-0.909312	0.488717	0.712657
Vmn2r112	-0.427302	-0.427302	2.2861	1.98692	-0.427302	-0.427302	-0.427302	-0.427302	-0.427302	-0.427302	-0.427302	-0.427302
Pgp	-0.576163	-0.576163	2.21661	1.78172	-0.576163	-0.576163	-0.576163	-0.576163	-0.576163	-0.576163	0.118733	0.492244
Lemd2	-0.623191	-0.623191	2.33526	0.858163	1.11669	0.675417	-0.623191	-0.623191	-0.623191	-0.623191	-0.623191	-0.623191
Rpl10a	-0.424462	-0.424462	2.43048	1.81413	-0.424462	-0.424462	-0.424462	-0.424462	-0.424462	-0.424462	-0.424462	-0.424462
U2af1	-0.42761	-0.42761	2.25839	2.01772	-0.42761	-0.42761	-0.42761	-0.42761	-0.42761	-0.42761	-0.42761	-0.42761
Zfp870	-0.428032	-0.428032	2.20064	2.07968	-0.428032	-0.428032	-0.428032	-0.428032	-0.428032	-0.428032	-0.428032	-0.428032
Zfp414	-0.410382	-0.410382	2.72094	1.38289	-0.410382	-0.410382	-0.410382	-0.410382	-0.410382	-0.410382	-0.410382	-0.410382
Neu1	-0.662543	-0.662543	1.77472	1.23583	1.45296	0.836841	-0.662543	-0.662543	-0.662543	-0.662543	-0.662543	-0.662543
Abcf1	-0.427504	-0.427504	2.26871	2.00633	-0.427504	-0.427504	-0.427504	-0.427504	-0.427504	-0.427504	-0.427504	-0.427504
Olfr95	-0.427705	-0.427705	2.24826	2.02879	-0.427705	-0.427705	-0.427705	-0.427705	-0.427705	-0.427705	-0.427705	-0.427705
Cdc5l	-0.589684	-0.589684	2.11759	2.0736	-0.122001	-0.0753229	-0.589684	-0.589684	-0.589684	-0.589684	-0.279036	-0.17672
Mrpl14	-0.411015	-0.411015	2.71234	1.39782	-0.411015	-0.411015	-0.411015	-0.411015	-0.411015	-0.411015	-0.411015	-0.411015
Arrdc5	-0.617041	-0.617041	2.00218	1.82221	-0.617041	-0.617041	-0.617041	-0.617041	-0.617041	-0.617041	0.497983	0.613962
Catsperd	-0.417721	-0.417721	2.60365	1.57356	-0.417721	-0.417721	-0.417721	-0.417721	-0.417721	-0.417721	-0.417721	-0.417721
Clip4	-1.03038	-1.03038	1.49894	1.45019	-1.03038	0.208738	-1.03038	-1.03038	0.961347	0.233906	0.410268	0.388505
Cyp1b1	-1.14796	-1.14796	1.85891	1.32292	0.439639	0.315594	-1.14796	-1.14796	0.14865	-0.0440832	0.109533	0.440675
Sos1	-0.622993	-0.622993	2.22983	1.42792	-0.622993	-0.622993	-0.622993	-0.622993	-0.622993	-0.622993	0.710705	0.615494
Kcng3	-0.428166	-0.428166	2.15556	2.1261	-0.428166	-0.428166	-0.428166	-0.428166	-0.428166	-0.428166	-0.428166	-0.428166
Rhoq	-0.842781	-0.842781	1.62633	1.33988	1.43806	0.428357	-0.842781	-0.842781	-0.842781	-0.842781	0.00840259	0.215651
Ttc7	-0.640135	-0.640135	2.05577	1.09996	1.40364	0.561717	-0.640135	-0.640135	-0.640135	-0.640135	-0.640135	-0.640135
Colec12	-0.759487	-0.759487	1.73543	1.43559	1.32125	0.708285	-0.759487	-0.759487	-0.759487	-0.759487	-0.399168	-0.244456
Thoc1	-0.633173	-0.633173	2.0771	2.0042	0.304956	-0.349918	-0.633173	-0.633173	-0.633173	-0.633173	-0.218054	-0.0192497
Ccdc178	-0.921127	-0.921127	1.51289	1.35565	1.28445	1.08033	-0.579658	-0.417345	-0.921127	-0.921127	-0.268092	-0.283715
Sap130	-0.858363	-0.858363	1.91894	1.07849	1.00427	0.819073	-0.858363	-0.858363	-0.858363	-0.858363	0.172225	0.15718
Pkd2l2	-0.872156	-0.872156	1.6191	1.54709	0.909096	0.619027	-0.872156	-0.872156	-0.872156	-0.872156	0.451495	0.0871312
Ctnna1	-0.428086	-0.428086	2.1881	2.09276	-0.428086	-0.428086	-0.428086	-0.428086	-0.428086	-0.428086	-0.428086	-0.428086
Lrrtm2	-0.753291	-0.753291	1.93982	1.74444	0.826411	0.221669	-0.753291	-0.753291	-0.753291	-0.753291	0.0253314	-0.237929
Matr3	-0.877828	-0.877828	1.60929	0.306019	1.51837	0.246739	-0.877828	-0.877828	-0.877828	-0.877828	0.608685	0.977875
Paip2	-0.733383	-0.733383	1.91388	1.0092	1.16187	1.16934	-0.733383	-0.733383	-0.733383	-0.733383	-0.495945	-0.358054
E230025N22Rik	-0.613461	-0.613461	2.04402	1.7891	-0.613461	-0.613461	-0.613461	-0.613461	-0.613461	-0.613461	0.408655	0.665916
Ndufa2	-0.898785	-0.898785	1.37334	1.08093	1.26235	1.17197	-0.898785	-0.898785	-0.898785	-0.898785	0.20449	0.299624
Rell2	-0.417998	-0.417998	2.59824	1.58174	-0.417998	-0.417998	-0.417998	-0.417998	-0.417998	-0.417998	-0.417998	-0.417998
Gnpda1	-0.614491	-0.614491	1.97695	1.86784	0.600321	0.470813	-0.614491	-0.614491	-0.614491	-0.614491	-0.614491	-0.614491
Ndfip1	-1.22645	-1.22645	1.4354	0.789895	1.01508	0.78559	-1.22645	-1.22645	0.548541	0.549552	0.00210744	-0.220369
Spry4	-0.881439	-0.881439	1.46203	1.35905	1.20182	0.913979	-0.881439	-0.881439	-0.881439	-0.881439	0.0976368	0.25411
Atg12	-0.409882	-0.409882	2.72757	1.37125	-0.409882	-0.409882	-0.409882	-0.409882	-0.409882	-0.409882	-0.409882	-0.409882
Cep120	-0.560521	-0.560521	2.13419	1.96367	-0.560521	-0.560521	-0.560521	-0.560521	-0.560521	-0.560521	0.217259	0.169058
Rps14	-0.551376	-0.551376	2.4118	1.63801	-0.551376	-0.551376	-0.551376	-0.551376	-0.551376	-0.551376	0.143162	0.218034
Pdgfrb	-0.674233	-0.674233	1.60758	1.27233	1.26593	1.24803	-0.674233	-0.674233	-0.674233	-0.674233	-0.674233	-0.674233
Arhgef37	-0.428123	-0.428123	2.17711	2.10412	-0.428123	-0.428123	-0.428123	-0.428123	-0.428123	-0.428123	-0.428123	-0.428123
Onecut2	-0.849221	-0.849221	1.63312	1.30371	1.35856	0.671566	-0.849221	-0.849221	-0.849221	-0.849221	0.0896353	0.0387421
Oacyl	-0.780888	-0.780888	1.79085	1.7599	0.971884	0.244199	-0.780888	-0.780888	-0.780888	-0.780888	-0.161931	0.0804199
Afg3l2	-0.752782	-0.752782	1.56027	1.54068	-0.752782	-0.752782	-0.752782	-0.752782	1.33914	0.839437	-0.419251	-0.343589
Smad4	-0.595677	-0.595677	2.13695	1.80377	0.38822	0.436485	-0.595677	-0.595677	-0.595677	-0.595677	-0.595677	-0.595677
Me2	-0.649661	-0.649661	2.06972	1.02575	1.24938	0.85244	-0.649661	-0.649661	-0.649661	-0.649661	-0.649661	-0.649661
Acaa2	-0.654279	-0.654279	2.09528	1.9238	0.34843	0.157711	-0.654279	-0.654279	-0.654279	-0.654279	-0.215189	-0.384355
Smad7	-0.650961	-0.650961	1.98628	1.41397	0.777313	1.03013	-0.650961	-0.650961	-0.650961	-0.650961	-0.650961	-0.650961
St8sia5	-1.3543	-1.3543	1.8987	1.40641	0.629959	0.222273	-0.548024	-0.531752	-0.465356	-0.528017	0.432756	0.191646
8030462N17Rik	-0.895346	-0.895346	1.72228	0.872333	0.433278	0.368146	-0.895346	-0.895346	-0.895346	-0.895346	0.682007	1.29404
Zfp236	-0.665954	-0.665954	1.62738	1.51965	0.848612	1.33199	-0.665954	-0.665954	-0.665954	-0.665954	-0.665954	-0.665954
Cndp1	-1.32348	-1.32348	1.06359	0.492169	0.231386	0.64115	0.930691	0.754529	-1.32348	-1.32348	0.482021	0.698366
B4gat1	-0.589323	-0.589323	2.23282	1.69795	-0.589323	-0.589323	-0.589323	-0.589323	-0.589323	-0.589323	0.240481	0.54333
Banf1	-0.428109	-0.428109	2.18154	2.09955	-0.428109	-0.428109	-0.428109	-0.428109	-0.428109	-0.428109	-0.428109	-0.428109
Arl2	-0.904131	-0.904131	1.63737	1.13267	1.17108	0.623161	-0.904131	-0.904131	-0.904131	-0.904131	0.456403	0.404106
Pygm	-0.427705	-0.427705	2.24826	2.02879	-0.427705	-0.427705	-0.427705	-0.427705	-0.427705	-0.427705	-0.427705	-0.427705
Cox8a	-0.803322	-0.803322	2.14001	1.20681	0.925546	0.476165	-0.803322	-0.803322	-0.803322	-0.803322	-0.0195516	0.0909532
Zbtb3	-0.913887	-0.913887	1.57665	1.14199	1.0047	0.886955	-0.913887	-0.913887	-0.913887	-0.913887	0.332348	0.540676
Fth1	-0.809081	-0.809081	1.55181	1.3876	1.21421	1.07831	-0.809081	-0.809081	-0.809081	-0.809081	-0.0652721	-0.312176
Rab3il1	-0.560854	-0.560854	2.16412	1.90936	-0.560854	-0.560854	-0.560854	-0.560854	-0.560854	-0.560854	0.0208708	0.392487
Fads1	-0.885648	-0.885648	1.66005	0.929805	1.27889	0.892081	-0.885648	-0.885648	-0.885648	-0.885648	0.487669	0.065399
Fen1	-0.856103	-0.856103	1.49758	1.49056	1.02091	1.04256	-0.856103	-0.856103	-0.856103	-0.856103	0.0935324	-0.00852352
Lrrc10b	-0.643988	-0.643988	2.01037	0.74839	1.52597	0.867172	-0.643988	-0.643988	-0.643988	-0.643988	-0.643988	-0.643988
Ms4a6d	-0.832777	-0.832777	2.15787	1.06169	-0.832777	-0.832777	-0.832777	-0.832777	0.476448	0.672282	0.613266	0.0151
Olfr1442	-0.627302	-0.627302	1.92724	1.53013	-0.627302	-0.627302	-0.627302	-0.627302	-0.627302	-0.627302	1.3181	0.242955
Keg1	-0.649607	-0.649607	1.65739	1.53506	1.50812	0.496289	-0.649607	-0.649607	-0.649607	-0.649607	-0.649607	-0.649607
Gm815	-0.80229	-0.80229	2.00629	1.66205	0.226299	0.212683	-0.80229	-0.80229	-0.80229	-0.80229	0.400282	0.306144
Jak2	-0.829724	-0.829724	1.77147	1.70738	0.690836	0.552914	-0.829724	-0.829724	-0.829724	-0.829724	0.113576	0.142167
Cpeb3	-0.760317	-0.760317	1.72669	1.19657	1.56898	0.683878	-0.760317	-0.760317	-0.760317	-0.760317	-0.296316	-0.317907
Cyp2c39	-0.42653	-0.42653	2.33796	1.92734	-0.42653	-0.42653	-0.42653	-0.42653	-0.42653	-0.42653	-0.42653	-0.42653
Pdlim1	-0.629674	-0.629674	1.96451	1.76422	0.656539	0.652124	-0.629674	-0.629674	-0.629674	-0.629674	-0.629674	-0.629674
Blnk	-0.89259	-0.89259	1.59109	0.967062	1.36226	0.6605	-0.89259	-0.89259	-0.89259	-0.89259	0.103698	0.670928
Pgam1	-0.62468	-0.62468	1.99958	1.76141	-0.62468	-0.62468	-0.62468	-0.62468	-0.62468	-0.62468	0.698587	0.537859
Ubtd1	-0.908735	-0.908735	1.30539	0.845659	1.13488	1.08619	-0.908735	-0.908735	-0.908735	-0.908735	0.00407035	1.07623
Marveld1	-0.427705	-0.427705	2.24826	2.02879	-0.427705	-0.427705	-0.427705	-0.427705	-0.427705	-0.427705	-0.427705	-0.427705
Zfyve27	-0.426553	-0.426553	2.33667	1.92886	-0.426553	-0.426553	-0.426553	-0.426553	-0.426553	-0.426553	-0.426553	-0.426553
R3hcc1l	-0.65716	-0.65716	1.97174	1.28788	1.04015	0.95751	-0.65716	-0.65716	-0.65716	-0.65716	-0.65716	-0.65716
Sec31b	-0.42595	-0.42595	2.36847	1.89104	-0.42595	-0.42595	-0.42595	-0.42595	-0.42595	-0.42595	-0.42595	-0.42595
Twnk	-0.893106	-0.893106	1.54552	1.13139	1.21419	0.968512	-0.893106	-0.893106	-0.893106	-0.893106	0.183488	0.315537
Cuedc2	-0.427903	-0.427903	2.22305	2.05598	-0.427903	-0.427903	-0.427903	-0.427903	-0.427903	-0.427903	-0.427903	-0.427903
Col17a1	-0.668165	-0.668165	1.60739	1.02075	-0.668165	-0.668165	-0.668165	-0.668165	-0.668165	-0.668165	1.12271	1.59446
Gsto2	-1.08137	-1.08137	1.78803	1.67631	0.275035	0.430506	0.0271683	-0.0336152	-1.08137	-1.08137	-0.0595909	0.221628
Eif3a	-0.8784	-0.8784	1.53717	1.1995	1.41248	0.530405	-0.8784	-0.8784	-0.8784	-0.8784	0.052717	0.538129
Gm13199	-0.845155	-0.845155	1.71519	1.44693	0.552573	1.11696	-0.845155	-0.845155	-0.845155	-0.845155	-0.10083	0.340099
Fbh1	-0.410233	-0.410233	2.72293	1.3794	-0.410233	-0.410233	-0.410233	-0.410233	-0.410233	-0.410233	-0.410233	-0.410233
Acbd5	-0.889588	-0.889588	1.69093	1.28189	0.828395	0.939275	-0.889588	-0.889588	-0.889588	-0.889588	0.334682	0.262354
Mastl	-0.416147	-0.416147	2.63269	1.52877	-0.416147	-0.416147	-0.416147	-0.416147	-0.416147	-0.416147	-0.416147	-0.416147
Arrdc1	-0.649818	-0.649818	2.01514	1.4103	-0.649818	-0.649818	-0.649818	-0.649818	-0.649818	-0.649818	0.876111	0.896995
Clic3	-1.67974	-1.67974	1.44774	1.0332	1.00386	0.603014	-0.10301	-0.700625	-0.324525	0.145301	0.411676	-0.157147
Agpat2	-0.683632	-0.683632	2.10437	1.91109	0.157533	0.2187	-0.683632	-0.683632	-0.683632	-0.683632	-0.161803	-0.128101
Brd3	-0.626019	-0.626019	1.91362	1.83485	0.776081	0.483592	-0.626019	-0.626019	-0.626019	-0.626019	-0.626019	-0.626019
Wdr5	-0.41596	-0.41596	2.63597	1.52363	-0.41596	-0.41596	-0.41596	-0.41596	-0.41596	-0.41596	-0.41596	-0.41596
Gfi1b	-0.422869	-0.422869	2.4824	1.74629	-0.422869	-0.422869	-0.422869	-0.422869	-0.422869	-0.422869	-0.422869	-0.422869
Ttf1	-0.643129	-0.643129	2.1142	1.33034	-0.643129	-0.643129	-0.643129	-0.643129	-0.643129	-0.643129	0.797436	0.903051
Setx	-0.903072	-0.903072	1.41869	1.2865	1.02521	1.07393	-0.903072	-0.903072	-0.903072	-0.903072	0.458795	0.155304
Cercam	-0.599322	-0.599322	2.0238	1.8988	-0.599322	-0.599322	-0.599322	-0.599322	-0.599322	-0.599322	0.2858	0.586169
Pkn3	-0.425682	-0.425682	2.38109	1.87573	-0.425682	-0.425682	-0.425682	-0.425682	-0.425682	-0.425682	-0.425682	-0.425682
Spout1	-0.426265	-0.426265	2.35256	1.91009	-0.426265	-0.426265	-0.426265	-0.426265	-0.426265	-0.426265	-0.426265	-0.426265
Slc25a25	-0.74074	-0.74074	1.96495	1.85542	-0.0452388	-0.186605	0.405151	0.450757	-0.74074	-0.74074	-0.74074	-0.74074
Fam102a	-0.655617	-0.655617	1.74371	1.70059	0.96221	0.838427	-0.655617	-0.655617	-0.655617	-0.655617	-0.655617	-0.655617
Dpm2	-0.798237	-0.798237	1.45166	1.32333	1.41166	1.09128	-0.798237	-0.798237	-0.798237	-0.798237	-0.332006	-0.156501
Ak1	-0.427912	-0.427912	2.22158	2.05754	-0.427912	-0.427912	-0.427912	-0.427912	-0.427912	-0.427912	-0.427912	-0.427912
Angptl2	-0.428164	-0.428164	2.15709	2.12455	-0.428164	-0.428164	-0.428164	-0.428164	-0.428164	-0.428164	-0.428164	-0.428164
Nek6	-0.842143	-0.842143	1.95307	1.43534	-0.842143	-0.842143	-0.842143	-0.842143	0.72028	0.333667	0.141524	0.468983
Kynu	-0.926829	-0.926829	1.54656	1.17199	0.579769	0.624157	-0.926829	-0.926829	-0.926829	-0.926829	0.898232	0.740272
Mbd5	-1.27355	-1.27355	1.2886	0.897538	0.0859291	0.0241222	-1.27355	-1.27355	0.834141	0.520845	0.599022	0.84401
Rnd3	-0.914319	-0.914319	1.6359	1.23599	0.83042	0.453853	-0.914319	-0.914319	-0.914319	-0.914319	0.647587	0.682165
Stam2	-0.899139	-0.899139	1.6357	1.4278	0.648854	0.40622	-0.899139	-0.899139	-0.899139	-0.899139	0.769864	0.506395
Klhl23	-0.904874	-0.904874	1.46601	0.621879	1.42552	1.04553	-0.904874	-0.904874	-0.904874	-0.904874	0.589009	0.281294
Hat1	-0.669283	-0.669283	1.70716	1.11389	-0.669283	-0.669283	-0.669283	-0.669283	-0.669283	-0.669283	1.429	1.10422
Sestd1	-0.835117	-0.835117	1.45508	1.01697	1.39615	1.30409	-0.835117	-0.835117	-0.835117	-0.835117	-0.103469	-0.0581283
Slc43a1	-0.65598	-0.65598	1.953	1.36739	1.0532	0.874256	-0.65598	-0.65598	-0.65598	-0.65598	-0.65598	-0.65598
Prg3	-0.581993	-0.581993	2.1807	1.82064	-0.581993	-0.581993	-0.581993	-0.581993	-0.581993	-0.581993	0.273402	0.381193
Olfr1040	-0.420211	-0.420211	2.55125	1.65086	-0.420211	-0.420211	-0.420211	-0.420211	-0.420211	-0.420211	-0.420211	-0.420211
Olfr1137	-0.415768	-0.415768	2.6393	1.51838	-0.415768	-0.415768	-0.415768	-0.415768	-0.415768	-0.415768	-0.415768	-0.415768
Olfr1167	-0.638455	-0.638455	1.89528	1.75711	0.745108	0.710143	-0.638455	-0.638455	-0.638455	-0.638455	-0.638455	-0.638455
Ckap5	-0.635671	-0.635671	1.88108	1.80068	-0.635671	-0.635671	-0.635671	-0.635671	-0.635671	-0.635671	0.675263	0.728346
Atg13	-0.834691	-0.834691	2.0634	1.11015	0.964571	0.43742	-0.834691	-0.834691	-0.834691	-0.834691	0.455459	-0.0228578
Trp53i11	-0.428152	-0.428152	2.16501	2.1165	-0.428152	-0.428152	-0.428152	-0.428152	-0.428152	-0.428152	-0.428152	-0.428152
Accs	-0.649471	-0.649471	1.82324	1.67165	1.02421	0.676668	-0.649471	-0.649471	-0.649471	-0.649471	-0.649471	-0.649471
Apip	-0.836656	-0.836656	1.50537	1.34778	1.28648	1.01874	-0.836656	-0.836656	-0.836656	-0.836656	0.0171998	-0.155637
Caprin1	-0.799063	-0.799063	2.25043	0.981063	0.681881	0.693959	-0.799063	-0.799063	-0.799063	-0.799063	0.391876	-0.204835
4931422A03Rik	-0.876925	-0.876925	1.53346	1.38974	1.21942	0.558517	-0.876925	-0.876925	-0.876925	-0.876925	0.551488	0.00892793
Mpped2	-0.931794	-0.931794	1.36141	1.08066	0.720671	0.42933	-0.931794	-0.931794	0.814661	1.18403	-0.931794	-0.931794
Lin7c	-0.912613	-0.912613	1.66396	0.900747	0.844576	0.948792	-0.912613	-0.912613	-0.912613	-0.912613	0.862688	0.254922
Srp14	-0.819333	-0.819333	1.66119	1.42999	1.39106	0.458707	-0.819333	-0.819333	-0.819333	-0.819333	-0.117252	0.0922989
Ivd	-0.496629	-0.496629	2.1211	2.11933	-0.496629	-0.496629	-0.496629	-0.496629	-0.496629	-0.496629	-0.118112	-0.149293
Vps18	-0.428174	-0.428174	2.14094	2.14081	-0.428174	-0.428174	-0.428174	-0.428174	-0.428174	-0.428174	-0.428174	-0.428174
Ino80	-0.654948	-0.654948	2.02276	1.009	-0.654948	-0.654948	-0.654948	-0.654948	-0.654948	-0.654948	1.20747	1.00036
Vps39	-0.424565	-0.424565	2.42671	1.81894	-0.424565	-0.424565	-0.424565	-0.424565	-0.424565	-0.424565	-0.424565	-0.424565
Zfp106	-0.427121	-0.427121	2.30003	1.97118	-0.427121	-0.427121	-0.427121	-0.427121	-0.427121	-0.427121	-0.427121	-0.427121
Ubr1	-0.874743	-0.874743	1.69423	1.5046	0.600165	0.585158	-0.874743	-0.874743	-0.874743	-0.874743	0.747266	0.117042
Tmem62	-0.902669	-0.902669	1.63276	0.761238	1.31735	0.837754	-0.902669	-0.902669	-0.902669	-0.902669	0.271098	0.595812
Zscan29	-0.655746	-0.655746	1.65612	1.41715	1.55996	0.612738	-0.655746	-0.655746	-0.655746	-0.655746	-0.655746	-0.655746
Ppip5k1	-0.672168	-0.672168	1.577	1.20724	1.09772	1.49539	-0.672168	-0.672168	-0.672168	-0.672168	-0.672168	-0.672168
Pdia3	-0.41742	-0.41742	2.60943	1.56477	-0.41742	-0.41742	-0.41742	-0.41742	-0.41742	-0.41742	-0.41742	-0.41742
Myef2	-0.428093	-0.428093	2.18613	2.0948	-0.428093	-0.428093	-0.428093	-0.428093	-0.428093	-0.428093	-0.428093	-0.428093
Secisbp2l	-0.428166	-0.428166	2.15556	2.1261	-0.428166	-0.428166	-0.428166	-0.428166	-0.428166	-0.428166	-0.428166	-0.428166
Gabpb1	-0.422642	-0.422642	2.48898	1.73744	-0.422642	-0.422642	-0.422642	-0.422642	-0.422642	-0.422642	-0.422642	-0.422642
Blvra	-0.768001	-0.768001	1.92523	1.74455	0.678363	0.313271	-0.768001	-0.768001	-0.768001	-0.768001	0.248378	-0.301788
Tmem127	-0.604796	-0.604796	2.48679	0.956119	0.728029	0.667434	-0.604796	-0.604796	-0.604796	-0.604796	-0.604796	-0.604796
Zfp661	-0.423298	-0.423298	2.46942	1.76356	-0.423298	-0.423298	-0.423298	-0.423298	-0.423298	-0.423298	-0.423298	-0.423298
Slc4a11	-0.669242	-0.669242	1.55664	0.923859	1.51407	1.35937	-0.669242	-0.669242	-0.669242	-0.669242	-0.669242	-0.669242
Cdc25b	-0.424754	-0.424754	2.4196	1.82794	-0.424754	-0.424754	-0.424754	-0.424754	-0.424754	-0.424754	-0.424754	-0.424754
Ap5s1	-0.856175	-0.856175	1.46948	1.46254	0.83643	1.25649	-0.856175	-0.856175	-0.856175	-0.856175	-0.0407257	0.152843
Cds2	-0.428173	-0.428173	2.14767	2.13406	-0.428173	-0.428173	-0.428173	-0.428173	-0.428173	-0.428173	-0.428173	-0.428173
Esf1	-0.873528	-0.873528	1.68364	1.61407	0.543209	0.330611	-0.873528	-0.873528	-0.873528	-0.873528	0.586679	0.482962
Scp2d1	-0.428173	-0.428173	2.14587	2.13586	-0.428173	-0.428173	-0.428173	-0.428173	-0.428173	-0.428173	-0.428173	-0.428173
Naa20	-0.606198	-0.606198	1.99848	1.88618	0.335748	0.62917	-0.606198	-0.606198	-0.606198	-0.606198	-0.606198	-0.606198
Vsx1	-0.668469	-0.668469	1.62403	1.17295	1.55707	0.993705	-0.668469	-0.668469	-0.668469	-0.668469	-0.668469	-0.668469
6820408C15Rik	-0.854855	-0.854855	1.69771	1.3781	1.11125	0.710473	-0.854855	-0.854855	-0.854855	-0.854855	0.299504	-0.0679005
Ttll9	-0.83265	-0.83265	1.51659	1.50893	-0.83265	-0.83265	-0.83265	-0.83265	1.42054	0.483643	0.101048	-0.0348441
Ccm2l	-0.414413	-0.414413	2.66185	1.48228	-0.414413	-0.414413	-0.414413	-0.414413	-0.414413	-0.414413	-0.414413	-0.414413
Tm9sf4	-0.424902	-0.424902	2.41389	1.83514	-0.424902	-0.424902	-0.424902	-0.424902	-0.424902	-0.424902	-0.424902	-0.424902
Dnmt3b	-0.654553	-0.654553	1.68005	1.43066	1.53392	0.591791	-0.654553	-0.654553	-0.654553	-0.654553	-0.654553	-0.654553
Ahcy	-0.863505	-0.863505	1.54878	1.15397	1.23459	1.07728	-0.863505	-0.863505	-0.863505	-0.863505	-0.137261	0.303673
Itch	-0.664744	-0.664744	1.62985	1.61479	-0.664744	-0.664744	-0.664744	-0.664744	0.875929	1.19739	-0.664744	-0.664744
Map1lc3a	-0.637156	-0.637156	1.93687	1.70521	-0.637156	-0.637156	-0.637156	-0.637156	-0.637156	-0.637156	0.596616	0.85855
Ncoa6	-0.634381	-0.634381	2.14821	1.9661	0.0467914	0.0711276	-0.634381	-0.634381	-0.634381	-0.634381	-0.15352	-0.272419
BC029722	-0.875565	-0.875565	1.64492	1.53498	0.838707	0.701948	-0.875565	-0.875565	-0.875565	-0.875565	0.278268	0.254575
Rbm12	-0.842977	-0.842977	1.56	1.2802	1.2465	0.195325	-0.842977	-0.842977	-0.842977	-0.842977	1.00879	-0.232945
Samhd1	-0.837295	-0.837295	1.44599	1.23659	1.36414	1.12933	-0.837295	-0.837295	-0.837295	-0.837295	0.0372442	-0.189529
Manbal	-1.29222	-1.29222	1.25633	0.896372	0.65411	0.151241	-1.29222	-1.29222	0.7592	0.835351	0.198439	0.417821
Fam83d	-0.881225	-0.881225	1.53113	1.19583	1.16109	0.725381	-0.881225	-0.881225	-0.881225	-0.881225	-0.145171	0.81909
Ift52	-0.912477	-0.912477	1.43835	1.11476	1.16965	0.201497	-0.912477	-0.912477	-0.912477	-0.912477	0.57295	0.97766
Sdc4	-0.421322	-0.421322	2.52451	1.68871	-0.421322	-0.421322	-0.421322	-0.421322	-0.421322	-0.421322	-0.421322	-0.421322
Acot8	-0.424039	-0.424039	2.44534	1.79506	-0.424039	-0.424039	-0.424039	-0.424039	-0.424039	-0.424039	-0.424039	-0.424039
Pcif1	-0.422672	-0.422672	2.48814	1.73857	-0.422672	-0.422672	-0.422672	-0.422672	-0.422672	-0.422672	-0.422672	-0.422672
Zfp335	-0.872192	-0.872192	1.82501	0.83456	1.19433	0.938191	-0.872192	-0.872192	-0.872192	-0.872192	0.172398	0.268661
Slc12a5	-0.559867	-0.559867	2.21574	1.86677	-0.559867	-0.559867	-0.559867	-0.559867	-0.559867	-0.559867	0.0995458	0.296872
Stau1	-0.812595	-0.812595	1.88252	1.74956	0.441656	0.163682	-0.812595	-0.812595	-0.812595	-0.812595	0.256491	0.38166
Cebpb	-0.645177	-0.645177	1.93886	1.59871	0.947001	0.676847	-0.645177	-0.645177	-0.645177	-0.645177	-0.645177	-0.645177
Mocs3	-0.661628	-0.661628	1.76287	1.54801	1.11251	0.869637	-0.661628	-0.661628	-0.661628	-0.661628	-0.661628	-0.661628
Bcas1	-0.674634	-0.674634	1.53353	1.28371	-0.674634	-0.674634	-0.674634	-0.674634	-0.674634	-0.674634	1.41551	1.16432
Gcnt7	-0.428117	-0.428117	2.17912	2.10205	-0.428117	-0.428117	-0.428117	-0.428117	-0.428117	-0.428117	-0.428117	-0.428117
Edn3	-0.780468	-0.780468	1.99681	1.71854	0.521537	0.320929	-0.780468	-0.780468	-0.780468	-0.780468	0.166854	-0.0418621
Rps21	-0.6157	-0.6157	2.18558	1.46131	0.984029	0.294688	-0.6157	-0.6157	-0.6157	-0.6157	-0.6157	-0.6157
Zbtb46	-0.671612	-0.671612	1.53371	1.36985	1.47335	0.995987	-0.671612	-0.671612	-0.671612	-0.671612	-0.671612	-0.671612
Stmn2	-0.867197	-0.867197	1.62934	1.25271	1.17594	0.519741	-0.867197	-0.867197	-0.867197	-0.867197	-0.142919	0.768376
Mrps28	-1.45213	-1.45213	1.64193	1.41072	-0.332479	-0.468563	0.171089	-0.354797	0.167274	-0.747729	0.809746	0.607076
Zfp704	-0.761664	-0.761664	1.9478	1.79363	-0.155084	0.00651027	-0.761664	-0.761664	-0.761664	-0.761664	0.546428	0.430707
Zfand1	-0.899494	-0.899494	1.46824	1.19355	1.18518	0.944969	-0.899494	-0.899494	-0.899494	-0.899494	0.0969505	0.508067
Chmp4c	-0.735736	-0.735736	2.13403	1.68191	0.559591	0.201051	-0.735736	-0.735736	-0.735736	-0.735736	-0.116589	-0.0455776
Nceh1	-0.426268	-0.426268	2.35238	1.9103	-0.426268	-0.426268	-0.426268	-0.426268	-0.426268	-0.426268	-0.426268	-0.426268
Actl6a	-0.884958	-0.884958	1.85023	1.04888	0.902618	0.820874	-0.884958	-0.884958	-0.884958	-0.884958	0.180864	0.506286
Bbs7	-0.428123	-0.428123	2.17711	2.10412	-0.428123	-0.428123	-0.428123	-0.428123	-0.428123	-0.428123	-0.428123	-0.428123
Naa15	-0.760076	-0.760076	1.87885	1.85008	0.711928	0.23411	-0.760076	-0.760076	-0.760076	-0.760076	-0.136689	0.0221714
Setd7	-0.888657	-0.888657	1.52083	1.50313	0.68832	0.389117	-0.888657	-0.888657	-0.888657	-0.888657	0.223427	1.00711
Supt20	-0.674348	-0.674348	2.24201	1.75109	-0.130136	-0.0507583	-0.674348	-0.674348	-0.674348	-0.674348	0.373558	-0.139682
Ccna1	-0.866359	-0.866359	1.76781	1.37484	0.936375	0.684729	-0.866359	-0.866359	-0.866359	-0.866359	0.360721	0.0736789
Tm4sf4	-0.823976	-0.823976	1.99745	1.45605	0.20763	0.34754	-0.823976	-0.823976	-0.823976	-0.823976	0.795705	0.139485
Wwtr1	-0.61382	-0.61382	2.17423	0.963056	1.50259	0.270688	-0.61382	-0.61382	-0.61382	-0.61382	-0.61382	-0.61382
Clrn1	-0.646887	-0.646887	1.9111	1.61185	0.96234	0.689808	-0.646887	-0.646887	-0.646887	-0.646887	-0.646887	-0.646887
Vmn2r1	-0.428024	-0.428024	2.20226	2.07798	-0.428024	-0.428024	-0.428024	-0.428024	-0.428024	-0.428024	-0.428024	-0.428024
1110032F04Rik	-0.766539	-0.766539	1.94145	1.85926	0.233964	-0.0461338	-0.766539	-0.766539	-0.766539	-0.766539	0.355779	0.254914
Trim59	-0.426635	-0.426635	2.33184	1.93451	-0.426635	-0.426635	-0.426635	-0.426635	-0.426635	-0.426635	-0.426635	-0.426635
Nmd3	-0.834828	-0.834828	1.50377	1.31741	1.3317	1.01032	-0.834828	-0.834828	-0.834828	-0.834828	-0.164959	0.0107365
Gm17359	-0.626786	-0.626786	2.00684	1.70346	-0.626786	-0.626786	-0.626786	-0.626786	-0.626786	-0.626786	0.454848	0.849144
Kirrel	-0.949571	-0.949571	1.1636	1.07372	0.790441	0.683652	-0.949571	-0.949571	-0.949571	-0.949571	0.89619	1.08983
Sh2d2a	-0.817365	-0.817365	1.71045	0.929525	1.47384	0.990377	-0.817365	-0.817365	-0.817365	-0.817365	-0.219972	0.0199696
Hapln2	-0.821916	-0.821916	1.81328	1.31629	1.05891	0.889329	-0.821916	-0.821916	-0.821916	-0.821916	-0.113247	-0.0330687
Glmp	-0.427155	-0.427155	2.29753	1.97402	-0.427155	-0.427155	-0.427155	-0.427155	-0.427155	-0.427155	-0.427155	-0.427155
Pbxip1	-0.642511	-0.642511	1.7835	1.22752	1.67416	0.454898	-0.642511	-0.642511	-0.642511	-0.642511	-0.642511	-0.642511
S100a5	-0.878305	-0.878305	1.75651	0.866345	1.0154	1.18357	-0.878305	-0.878305	-0.878305	-0.878305	0.265151	0.182859
S100a6	-0.62727	-0.62727	2.26676	0.762375	1.27268	0.716346	-0.62727	-0.62727	-0.62727	-0.62727	-0.62727	-0.62727
Sprr4	-0.425284	-0.425284	2.39848	1.85436	-0.425284	-0.425284	-0.425284	-0.425284	-0.425284	-0.425284	-0.425284	-0.425284
Snx27	-1.16712	-1.16712	1.33382	1.08566	1.0989	0.702541	-1.16712	-1.16712	-0.428833	-0.250865	0.635428	0.491816
Tuft1	-0.414024	-0.414024	2.66806	1.47218	-0.414024	-0.414024	-0.414024	-0.414024	-0.414024	-0.414024	-0.414024	-0.414024
Tnfaip8l2	-0.890713	-0.890713	1.58482	1.23976	0.511166	1.27406	-0.890713	-0.890713	-0.890713	-0.890713	0.231448	0.50303
Anxa9	-0.423794	-0.423794	2.45358	1.78435	-0.423794	-0.423794	-0.423794	-0.423794	-0.423794	-0.423794	-0.423794	-0.423794
Cers2	-0.41794	-0.41794	2.5994	1.58	-0.41794	-0.41794	-0.41794	-0.41794	-0.41794	-0.41794	-0.41794	-0.41794
Arnt	-0.904542	-0.904542	1.30234	0.775462	1.22248	0.0405388	-0.904542	-0.904542	-0.904542	-0.904542	0.797573	1.28886
Gpr89	-0.412036	-0.412036	2.69799	1.42237	-0.412036	-0.412036	-0.412036	-0.412036	-0.412036	-0.412036	-0.412036	-0.412036
Bcl9	-0.603141	-0.603141	2.02026	1.89564	-0.603141	-0.603141	-0.603141	-0.603141	-0.603141	-0.603141	0.426894	0.482343
Notch2	-0.728606	-0.728606	2.18543	1.71383	0.174955	0.258535	-0.728606	-0.728606	-0.728606	-0.728606	-0.0210434	0.0599317
Hipk1	-0.670748	-0.670748	1.59903	1.19432	1.51898	1.05365	-0.670748	-0.670748	-0.670748	-0.670748	-0.670748	-0.670748
Slc16a1	-0.870202	-0.870202	1.5134	1.41802	1.33368	0.497481	-0.870202	-0.870202	-0.870202	-0.870202	0.338816	0.119821
Rap1a	-0.654027	-0.654027	1.91468	1.50859	0.905612	0.903334	-0.654027	-0.654027	-0.654027	-0.654027	-0.654027	-0.654027
Tmigd3	-0.415659	-0.415659	2.64116	1.51543	-0.415659	-0.415659	-0.415659	-0.415659	-0.415659	-0.415659	-0.415659	-0.415659
Cept1	-1.65969	-1.65969	1.4097	0.591057	0.860606	0.908017	0.604454	0.438156	-0.399785	-0.886586	0.0766595	-0.282889
Ampd2	-0.428143	-0.428143	2.16891	2.11253	-0.428143	-0.428143	-0.428143	-0.428143	-0.428143	-0.428143	-0.428143	-0.428143
Mfsd14a	-0.426197	-0.426197	2.35613	1.90584	-0.426197	-0.426197	-0.426197	-0.426197	-0.426197	-0.426197	-0.426197	-0.426197
Slc44a3	-0.605803	-0.605803	2.25428	1.88055	0.0322334	0.0596176	-0.605803	-0.605803	-0.605803	-0.605803	-0.290617	-0.301238
Fnbp1l	-0.913501	-0.913501	1.31124	0.95619	1.21125	1.26997	-0.913501	-0.913501	-0.913501	-0.913501	0.290989	0.441364
Eif4e	-0.578773	-0.578773	2.039	1.98935	-0.578773	-0.578773	-0.578773	-0.578773	-0.578773	-0.578773	0.410553	0.191281
Clca4a	-0.763588	-0.763588	1.87924	0.727563	1.81375	0.354036	-0.763588	-0.763588	-0.763588	-0.763588	-0.155824	-0.0372393
Fubp1	-0.858856	-0.858856	1.48854	0.837895	1.36691	1.31144	-0.858856	-0.858856	-0.858856	-0.858856	-0.0947315	0.243077
Acadm	-0.419218	-0.419218	2.57326	1.61892	-0.419218	-0.419218	-0.419218	-0.419218	-0.419218	-0.419218	-0.419218	-0.419218
Slc44a5	-0.888276	-0.888276	1.42462	0.191737	0.909223	0.226731	-0.888276	-0.888276	-0.888276	-0.888276	1.29345	1.28389
Lhx8	-0.661695	-0.661695	1.64178	0.73664	-0.661695	-0.661695	-0.661695	-0.661695	-0.661695	-0.661695	1.38622	1.52892
Cth	-0.956473	-0.956473	1.79666	1.72186	0.49095	0.083847	-0.956473	-0.956473	-0.586128	-0.481371	0.352746	0.44733
Srsf11	-0.64989	-0.64989	2.00881	1.22753	0.705029	1.25776	-0.64989	-0.64989	-0.64989	-0.64989	-0.64989	-0.64989
Rps20	-0.63585	-0.63585	2.19163	0.704917	-0.63585	-0.63585	-0.63585	-0.63585	-0.63585	-0.63585	0.912377	1.27787
2610301B20Rik	-0.915115	-0.915115	1.3653	1.25357	0.389155	0.363119	-0.915115	-0.915115	1.13176	0.987787	-0.915115	-0.915115
Ccne2	-0.553057	-0.553057	2.41309	1.60697	-0.553057	-0.553057	-0.553057	-0.553057	-0.553057	-0.553057	0.383755	0.0206436
Pip4p2	-0.934495	-0.934495	1.51388	0.739231	-0.934495	-0.934495	0.642044	0.927811	1.06175	0.722249	-0.934495	-0.934495
Osgin2	-0.734312	-0.734312	2.32731	1.49238	0.182155	0.0853322	-0.734312	-0.734312	-0.734312	-0.734312	0.0370539	0.281646
Orc3	-0.782529	-0.782529	1.60516	1.50338	1.41935	0.609712	-0.782529	-0.782529	-0.782529	-0.782529	-0.170988	-0.271434
C9orf72	-1.14417	-1.14417	1.54224	1.12524	0.320227	0.429297	-1.14417	-1.14417	0.765216	0.973007	-0.5465	-0.0320446
Topors	-0.843418	-0.843418	2.05912	1.20974	0.735772	0.52165	-0.843418	-0.843418	-0.843418	-0.843418	0.0770185	0.457213
Spink4	-0.651629	-0.651629	1.82201	1.67195	-0.651629	-0.651629	-0.651629	-0.651629	-0.651629	-0.651629	0.787814	0.931256
Enho	-0.664397	-0.664397	1.6883	1.51412	1.27298	0.839771	-0.664397	-0.664397	-0.664397	-0.664397	-0.664397	-0.664397
Cd72	-0.713382	-0.713382	1.80607	1.45489	1.27487	0.634447	-0.713382	-0.713382	-0.713382	-0.713382	-0.176608	-0.713382
Tmem8b	-0.411306	-0.411306	2.70832	1.40474	-0.411306	-0.411306	-0.411306	-0.411306	-0.411306	-0.411306	-0.411306	-0.411306
Polr1e	-0.766156	-0.766156	2.19321	1.43756	0.685534	-0.0848577	-0.766156	-0.766156	-0.766156	-0.766156	0.35206	0.0134262
Igfbpl1	-0.635125	-0.635125	1.84852	1.6674	-0.635125	-0.635125	-0.635125	-0.635125	-0.635125	-0.635125	0.36364	1.20143
Tstd2	-0.890035	-0.890035	1.52185	1.031	1.47361	0.666867	-0.890035	-0.890035	-0.890035	-0.890035	0.17755	0.469327
Trim14	-0.659551	-0.659551	1.7219	1.06286	1.64656	0.845095	-0.659551	-0.659551	-0.659551	-0.659551	-0.659551	-0.659551
Tgfbr1	-0.631433	-0.631433	2.15696	1.39252	-0.631433	-0.631433	-0.631433	-0.631433	-0.631433	-0.631433	0.53794	0.964045
Abca1	-0.662741	-0.662741	1.77425	1.32902	1.37761	0.821054	-0.662741	-0.662741	-0.662741	-0.662741	-0.662741	-0.662741
Epb41l4b	-0.889256	-0.889256	1.47747	1.45049	0.995946	0.880246	-0.889256	-0.889256	-0.889256	-0.889256	0.0916246	0.439766
Svep1	-0.780252	-0.780252	1.98904	1.68565	0.255795	0.693636	-0.780252	-0.780252	-0.780252	-0.780252	0.00307072	0.0543101
Inip	-0.416305	-0.416305	2.62989	1.53316	-0.416305	-0.416305	-0.416305	-0.416305	-0.416305	-0.416305	-0.416305	-0.416305
Snx30	-0.489065	-0.489065	2.33797	1.88927	-0.489065	-0.489065	-0.489065	-0.489065	-0.489065	-0.489065	-0.185097	-0.129628
Slc46a2	-0.42674	-0.42674	2.32552	1.94188	-0.42674	-0.42674	-0.42674	-0.42674	-0.42674	-0.42674	-0.42674	-0.42674
Mup18	-0.817076	-0.817076	1.70656	0.858366	1.48796	1.04977	-0.817076	-0.817076	-0.817076	-0.817076	-0.0326416	-0.167556
Tle1	-1.18611	-1.18611	1.23324	1.10263	0.023028	-0.162645	-1.18611	-1.18611	0.574959	-0.132321	1.2015	0.904036
Zdhhc21	-0.62717	-0.62717	1.97045	1.75741	-0.62717	-0.62717	-0.62717	-0.62717	-0.62717	-0.62717	0.803952	0.485543
Mtap	-0.661851	-0.661851	1.70209	1.60095	1.15702	0.834755	-0.661851	-0.661851	-0.661851	-0.661851	-0.661851	-0.661851
Plaa	-0.660671	-0.660671	1.73248	1.62903	-0.660671	-0.660671	-0.660671	-0.660671	-0.660671	-0.660671	0.928359	0.995498
Cyp2j5	-0.668379	-0.668379	1.65662	1.28808	-0.668379	-0.668379	-0.668379	-0.668379	-0.668379	-0.668379	1.46289	0.939436
Patj	-0.728491	-0.728491	2.12701	1.79487	0.211328	0.0365089	-0.728491	-0.728491	-0.728491	-0.728491	0.144358	0.0568715
Dock7	-1.59105	-1.59105	1.5602	0.977797	-0.707286	-0.595619	0.618646	-0.381932	0.72422	0.249254	0.759004	-0.0221762
Cachd1	-0.881796	-0.881796	1.70022	1.37559	0.873976	0.679482	-0.881796	-0.881796	-0.881796	-0.881796	0.099137	0.56237
Coa7	-0.940131	-0.940131	1.22648	0.422139	1.05506	0.997753	-0.940131	-0.940131	-0.940131	-0.940131	0.857293	1.08206
Calr4	-0.904776	-0.904776	1.64738	0.88025	1.2874	0.752761	-0.904776	-0.904776	-0.904776	-0.904776	0.480353	0.380512
Rnf11	-0.426694	-0.426694	2.32832	1.93862	-0.426694	-0.426694	-0.426694	-0.426694	-0.426694	-0.426694	-0.426694	-0.426694
Dmrta2	-1.0521	-1.0521	1.79672	1.6029	0.661113	0.386699	-1.0521	-1.0521	0.0905811	0.192366	-0.202545	-0.319447
Pdzk1ip1	-0.42496	-0.42496	2.41162	1.83798	-0.42496	-0.42496	-0.42496	-0.42496	-0.42496	-0.42496	-0.42496	-0.42496
Cyp4x1	-0.903873	-0.903873	1.55355	1.29514	1.07587	0.705088	-0.903873	-0.903873	-0.903873	-0.903873	0.533971	0.25962
Faah	-0.717488	-0.717488	1.99434	1.0694	1.39291	0.697426	-0.717488	-0.717488	-0.717488	-0.717488	-0.464092	-0.385054
Pik3r3	-0.714237	-0.714237	2.04351	1.85663	-0.714237	-0.714237	-0.714237	-0.714237	-0.060317	-0.249034	0.279183	0.415451
Ipp	-0.422444	-0.422444	2.49462	1.72982	-0.422444	-0.422444	-0.422444	-0.422444	-0.422444	-0.422444	-0.422444	-0.422444
Eif2b3	-0.894414	-0.894414	2.35756	1.42133	0.16893	0.10367	-0.894414	-0.894414	0.099655	-0.0168949	-0.184968	-0.37163
Ptch2	-0.673023	-0.673023	2.14479	1.87635	0.298306	0.0601754	-0.673023	-0.673023	-0.673023	-0.673023	-0.243212	-0.0982734
Elovl1	-0.401963	-0.401963	2.81775	1.20188	-0.401963	-0.401963	-0.401963	-0.401963	-0.401963	-0.401963	-0.401963	-0.401963
Col9a2	-0.833765	-0.833765	1.55106	1.30119	1.19398	1.13442	-0.833765	-0.833765	-0.833765	-0.833765	-0.119026	-0.0590295
Maneal	-0.427864	-0.427864	2.22859	2.05005	-0.427864	-0.427864	-0.427864	-0.427864	-0.427864	-0.427864	-0.427864	-0.427864
Meaf6	-0.645333	-0.645333	1.87706	1.26748	-0.645333	-0.645333	-0.645333	-0.645333	-0.645333	-0.645333	0.508011	1.51011
Sh3d21	-0.610268	-0.610268	2.3479	1.33298	-0.610268	-0.610268	-0.610268	-0.610268	-0.610268	-0.610268	0.531379	0.669882
Gjb5	-0.416914	-0.416914	2.61888	1.55025	-0.416914	-0.416914	-0.416914	-0.416914	-0.416914	-0.416914	-0.416914	-0.416914
Zscan20	-0.665785	-0.665785	1.84359	1.21251	1.07191	1.19827	-0.665785	-0.665785	-0.665785	-0.665785	-0.665785	-0.665785
Rnf19b	-0.884921	-0.884921	1.59647	1.46974	1.05454	0.354199	-0.884921	-0.884921	-0.884921	-0.884921	0.358697	0.475874
Sync	-0.78412	-0.78412	1.9625	1.70197	0.282515	0.16436	-0.78412	-0.78412	0.670824	-0.0774463	-0.78412	-0.78412
Epb41	-0.9332	-0.9332	1.33297	1.31079	0.719446	0.493493	-0.9332	-0.9332	-0.9332	-0.9332	0.887824	0.854684
Ppp1r8	-0.664739	-0.664739	1.70208	1.27593	-0.664739	-0.664739	-0.664739	-0.664739	-0.664739	-0.664739	0.851879	1.48802
Wdtc1	-0.613108	-0.613108	1.93264	1.91713	-0.613108	-0.613108	-0.613108	-0.613108	-0.613108	-0.613108	0.414204	0.640885
Gpn2	-0.652705	-0.652705	1.72294	1.69269	1.15524	0.650776	-0.652705	-0.652705	-0.652705	-0.652705	-0.652705	-0.652705
Sh3bgrl3	-0.750005	-0.750005	2.00796	1.70203	0.633696	0.465367	-0.750005	-0.750005	-0.750005	-0.750005	-0.277492	-0.0315351
Clic4	-0.824671	-0.824671	1.66368	1.61896	1.04713	0.657072	-0.824671	-0.824671	-0.824671	-0.824671	-0.0482071	0.00938834
Eloa	-0.714342	-0.714342	2.13052	1.78559	0.309039	0.23289	-0.714342	-0.714342	-0.714342	-0.714342	-0.238191	0.0662103
C1qa	-0.905901	-0.905901	1.60616	0.90153	0.840367	1.08709	-0.905901	-0.905901	-0.905901	-0.905901	0.115868	0.884397
Zbtb17	-0.427805	-0.427805	2.23641	2.04165	-0.427805	-0.427805	-0.427805	-0.427805	-0.427805	-0.427805	-0.427805	-0.427805
Pramef8	-0.647767	-0.647767	1.98741	0.626555	-0.647767	-0.647767	-0.647767	-0.647767	1.32322	1.24495	-0.647767	-0.647767
Gm13088	-0.618432	-0.618432	2.1794	1.57408	-0.618432	-0.618432	-0.618432	-0.618432	-0.618432	-0.618432	0.594151	0.599818
Ube4b	-0.669767	-0.669767	1.58746	1.04197	1.56763	1.16107	-0.669767	-0.669767	-0.669767	-0.669767	-0.669767	-0.669767
Thap3	-0.817767	-0.817767	1.69159	1.52069	0.426854	1.24751	-0.817767	-0.817767	-0.817767	-0.817767	-0.183527	0.203488
Hes2	-0.427787	-0.427787	2.23864	2.03923	-0.427787	-0.427787	-0.427787	-0.427787	-0.427787	-0.427787	-0.427787	-0.427787
Acot7	-0.902106	-0.902106	1.58117	1.08979	1.15554	0.844061	-0.902106	-0.902106	-0.902106	-0.902106	0.601706	0.140364
Gpr153	-0.42619	-0.42619	2.3565	1.9054	-0.42619	-0.42619	-0.42619	-0.42619	-0.42619	-0.42619	-0.42619	-0.42619
Morn1	-0.90478	-0.90478	1.55564	1.03722	1.29967	0.785873	-0.90478	-0.90478	-0.90478	-0.90478	0.329361	0.420906
Prkcz	-0.428127	-0.428127	2.17541	2.10586	-0.428127	-0.428127	-0.428127	-0.428127	-0.428127	-0.428127	-0.428127	-0.428127
Cdk11b	-0.599923	-0.599923	2.07586	1.80628	-0.599923	-0.599923	-0.599923	-0.599923	-0.599923	-0.599923	0.2054	0.711847
Fndc10	-0.64607	-0.64607	1.94756	1.456	-0.64607	-0.64607	-0.64607	-0.64607	-0.64607	-0.64607	0.574112	1.19088
Atad3a	-0.898706	-0.898706	1.6461	1.11393	1.25259	0.454631	-0.898706	-0.898706	-0.898706	-0.898706	0.464276	0.460701
Perm1	-0.66956	-0.66956	1.70729	1.41581	1.12561	1.10777	-0.66956	-0.66956	-0.66956	-0.66956	-0.66956	-0.66956
Cdk14	-0.859487	-0.859487	1.76296	1.53056	0.508065	0.486246	-0.859487	-0.859487	-0.859487	-0.859487	0.0846778	0.784412
1700015F17Rik	-0.647226	-0.647226	1.9794	1.44948	-0.647226	-0.647226	-0.647226	-0.647226	-0.647226	-0.647226	0.650414	1.09851
Steap2	-0.757938	-0.757938	2.27881	1.41184	0.43752	0.4149	-0.757938	-0.757938	-0.757938	-0.757938	-0.0386792	0.043241
Lrrc17	-0.427474	-0.427474	2.27142	2.00332	-0.427474	-0.427474	-0.427474	-0.427474	-0.427474	-0.427474	-0.427474	-0.427474
Fbxl13	-0.416694	-0.416694	2.62289	1.54405	-0.416694	-0.416694	-0.416694	-0.416694	-0.416694	-0.416694	-0.416694	-0.416694
Agap3	-0.42615	-0.42615	2.35856	1.90294	-0.42615	-0.42615	-0.42615	-0.42615	-0.42615	-0.42615	-0.42615	-0.42615
Rheb	-0.892131	-0.892131	1.46971	1.12902	0.909726	1.06272	-0.892131	-0.892131	-0.892131	-0.892131	-0.122731	0.904345
Kmt2c	-0.586159	-0.586159	2.20661	1.76828	0.346725	0.367653	-0.586159	-0.586159	-0.586159	-0.586159	-0.586159	-0.586159
Mnx1	-0.858641	-0.858641	2.01406	0.910768	0.268096	0.178607	-0.858641	-0.858641	0.8591	0.921214	-0.858641	-0.858641
Mapre3	-0.817686	-0.817686	1.9778	1.42129	0.871283	0.541154	-0.817686	-0.817686	-0.817686	-0.817686	0.0395848	0.0550052
Gtf3c2	-0.917398	-0.917398	1.43608	0.953516	1.32352	0.901988	-0.917398	-0.917398	-0.917398	-0.917398	0.349606	0.539676
Plb1	-0.889801	-0.889801	1.64067	1.45287	0.787582	0.588046	-0.889801	-0.889801	-0.889801	-0.889801	0.208243	0.661401
Ywhah	-0.875102	-0.875102	1.62603	0.821306	1.60203	0.505972	-0.875102	-0.875102	-0.875102	-0.875102	0.453642	0.241637
Maea	-0.642273	-0.642273	1.81091	1.77251	0.964538	0.590232	-0.642273	-0.642273	-0.642273	-0.642273	-0.642273	-0.642273
Tacc3	-0.645625	-0.645625	1.7798	1.53085	1.39347	0.460879	-0.645625	-0.645625	-0.645625	-0.645625	-0.645625	-0.645625
Fgfr3	-0.912334	-0.912334	1.25617	1.14489	1.00617	0.744087	-0.912334	-0.912334	-0.912334	-0.912334	0.0798117	1.24287
Nsd2	-0.762773	-0.762773	1.77071	1.49787	0.562857	1.28833	-0.762773	-0.762773	-0.762773	-0.762773	-0.325887	-0.217252
Tnip2	-0.424367	-0.424367	2.43388	1.80979	-0.424367	-0.424367	-0.424367	-0.424367	-0.424367	-0.424367	-0.424367	-0.424367
Ablim2	-0.42561	-0.42561	2.38434	1.87175	-0.42561	-0.42561	-0.42561	-0.42561	-0.42561	-0.42561	-0.42561	-0.42561
Mrfap1	-1.19184	-1.19184	1.47459	1.33122	0.354862	0.46251	-1.19184	-1.19184	0.5995	-0.347659	0.169337	0.723002
Jakmip1	-0.656946	-0.656946	1.79935	1.49813	-0.656946	-0.656946	-0.656946	-0.656946	-0.656946	-0.656946	0.706774	1.25132
Lap3	-0.425759	-0.425759	2.37757	1.88002	-0.425759	-0.425759	-0.425759	-0.425759	-0.425759	-0.425759	-0.425759	-0.425759
Pds5a	-0.78515	-0.78515	1.75965	1.53283	1.09452	0.751856	-0.78515	-0.78515	-0.78515	-0.78515	-0.198533	-0.22942
Apbb2	-0.696163	-0.696163	1.8599	1.81697	1.05704	0.0858267	-0.696163	-0.696163	-0.696163	-0.696163	-0.3103	-0.332465
Fryl	-0.652197	-0.652197	1.86236	1.5638	-0.652197	-0.652197	-0.652197	-0.652197	-0.652197	-0.652197	0.697389	1.09403
Fip1l1	-0.837019	-0.837019	1.57065	1.37319	1.51403	0.348926	-0.837019	-0.837019	-0.837019	-0.837019	0.165084	0.0502406
Gsx2	-0.427789	-0.427789	2.23849	2.0394	-0.427789	-0.427789	-0.427789	-0.427789	-0.427789	-0.427789	-0.427789	-0.427789
Tmprss11d	-1.1994	-1.1994	1.2492	1.06015	0.704081	0.123011	-1.1994	-1.1994	-0.0569149	-0.256051	1.11581	0.858301
Tmprss11e	-0.424303	-0.424303	2.43618	1.80684	-0.424303	-0.424303	-0.424303	-0.424303	-0.424303	-0.424303	-0.424303	-0.424303
Csn1s2b	-0.423976	-0.423976	2.4475	1.79226	-0.423976	-0.423976	-0.423976	-0.423976	-0.423976	-0.423976	-0.423976	-0.423976
Sowahb	-0.426868	-0.426868	2.31741	1.95127	-0.426868	-0.426868	-0.426868	-0.426868	-0.426868	-0.426868	-0.426868	-0.426868
Fgf5	-0.893534	-0.893534	1.48424	1.09942	1.2619	1.03508	-0.893534	-0.893534	-0.893534	-0.893534	0.143698	0.336873
Vamp9	-0.882658	-0.882658	1.48753	1.19854	1.28599	0.979492	-0.882658	-0.882658	-0.882658	-0.882658	0.128845	0.215552
Sec31a	-0.846369	-0.846369	1.74801	1.1572	1.38988	0.485259	-0.846369	-0.846369	-0.846369	-0.846369	-0.0698135	0.367681
Lin54	-0.618924	-0.618924	2.33448	1.23182	-0.618924	-0.618924	-0.618924	-0.618924	-0.618924	-0.618924	0.625261	0.759824
Coq2	-0.800526	-0.800526	1.87801	1.68506	0.714187	0.477452	-0.800526	-0.800526	-0.800526	-0.800526	0.18138	-0.132936
Spp1	-0.628745	-0.628745	1.70348	1.5122	-0.628745	-0.628745	-0.628745	-0.628745	-0.628745	-0.628745	1.61532	0.198959
Zfp951	-0.876936	-0.876936	1.79551	1.39234	0.529052	0.235033	-0.876936	-0.876936	-0.876936	-0.876936	0.778675	0.531012
Tgfbr3	-0.885354	-0.885354	2.03017	1.74987	0.189666	-0.110113	-0.885354	-0.885354	0.513705	0.0237024	-0.462439	-0.393146
Tmed5	-0.425216	-0.425216	2.40131	1.85085	-0.425216	-0.425216	-0.425216	-0.425216	-0.425216	-0.425216	-0.425216	-0.425216
Fbrsl1	-0.671493	-0.671493	2.18115	1.67314	-0.398902	-0.355033	-0.671493	-0.671493	-0.671493	-0.671493	0.360761	0.567844
2900026A02Rik	-0.421041	-0.421041	2.53151	1.6789	-0.421041	-0.421041	-0.421041	-0.421041	-0.421041	-0.421041	-0.421041	-0.421041
Mlec	-0.619581	-0.619581	2.32448	1.23363	-0.619581	-0.619581	-0.619581	-0.619581	-0.619581	-0.619581	0.585323	0.813211
Pop5	-0.864519	-0.864519	1.9077	1.40215	0.447653	0.564184	-0.864519	-0.864519	-0.864519	-0.864519	0.340236	0.52519
Bicdl1	-0.797856	-0.797856	1.89981	1.43301	1.05639	0.614847	-0.797856	-0.797856	-0.797856	-0.797856	-0.0979966	-0.118933
Pebp1	-0.635566	-0.635566	1.91135	1.75747	0.818229	0.597481	-0.635566	-0.635566	-0.635566	-0.635566	-0.635566	-0.635566
Fbxo21	-0.904342	-0.904342	1.40803	1.33181	1.22127	0.625924	-0.904342	-0.904342	-0.904342	-0.904342	0.644755	0.194263
Mapkapk5	-1.0484	-1.0484	2.21665	0.655627	0.133587	-0.139019	1.06355	0.298206	-1.0484	-1.0484	-0.0506832	0.0156941
Anapc5	-0.651418	-0.651418	1.96696	1.45424	0.993029	0.797119	-0.651418	-0.651418	-0.651418	-0.651418	-0.651418	-0.651418
Bcl7a	-0.865802	-0.865802	1.6914	1.64295	0.343765	0.697958	-0.865802	-0.865802	-0.865802	-0.865802	0.380098	0.438642
Kmt5a	-0.804289	-0.804289	1.92476	0.982659	1.02528	1.16431	-0.804289	-0.804289	-0.804289	-0.804289	-0.0868613	-0.184423
Adgrd1	-0.83647	-0.83647	1.67029	1.59022	0.0587303	-0.0162166	-0.83647	-0.83647	-0.83647	-0.83647	0.796524	0.919268
Gtf2i	-0.420614	-0.420614	2.54183	1.66432	-0.420614	-0.420614	-0.420614	-0.420614	-0.420614	-0.420614	-0.420614	-0.420614
Gtf2ird1	-0.883972	-0.883972	1.58038	1.29053	0.945939	1.0749	-0.883972	-0.883972	-0.883972	-0.883972	0.124232	0.287854
Cldn13	-0.633265	-0.633265	1.93306	1.67639	-0.633265	-0.633265	-0.633265	-0.633265	-0.633265	-0.633265	0.425126	1.03154
Rhbdd2	-0.817497	-0.817497	1.90401	1.6808	0.508242	0.0766093	-0.817497	-0.817497	-0.817497	-0.817497	0.41921	0.316111
Zscan21	-0.648244	-0.648244	1.83085	1.71029	-0.648244	-0.648244	-0.648244	-0.648244	-0.648244	-0.648244	0.7575	0.887312
Zfp113	-1.06004	-1.06004	1.7013	1.60908	0.347965	0.57307	-1.06004	-1.06004	0.64186	-0.126633	-0.34254	-0.163963
Eif3b	-0.808597	-0.808597	1.93361	1.61155	0.473796	-0.0483719	-0.808597	-0.808597	-0.808597	-0.808597	0.189331	0.691656
Ap5z1	-0.629089	-0.629089	2.10727	1.55662	0.555008	0.813814	-0.629089	-0.629089	-0.629089	-0.629089	-0.629089	-0.629089
Radil	-0.631909	-0.631909	2.16576	1.43274	-0.631909	-0.631909	-0.631909	-0.631909	-0.631909	-0.631909	0.703969	0.752804
Fscn1	-1.11604	-1.11604	1.923	1.39588	0.242881	0.345494	-1.11604	-1.11604	0.11404	-0.119391	0.218751	0.343487
Usp12	-0.427919	-0.427919	2.22057	2.05862	-0.427919	-0.427919	-0.427919	-0.427919	-0.427919	-0.427919	-0.427919	-0.427919
Gtf3a	-0.428056	-0.428056	2.19551	2.08505	-0.428056	-0.428056	-0.428056	-0.428056	-0.428056	-0.428056	-0.428056	-0.428056
Medag	-0.788541	-0.788541	1.79722	1.75551	0.71576	0.609861	-0.788541	-0.788541	-0.788541	-0.788541	-0.250148	0.10305
Hsph1	-0.760541	-0.760541	1.72904	1.67833	0.941574	0.811066	-0.760541	-0.760541	-0.760541	-0.760541	-0.315999	-0.280769
N4bp2l2	-0.425886	-0.425886	2.37157	1.88729	-0.425886	-0.425886	-0.425886	-0.425886	-0.425886	-0.425886	-0.425886	-0.425886
Mios	-0.428014	-0.428014	2.20434	2.07579	-0.428014	-0.428014	-0.428014	-0.428014	-0.428014	-0.428014	-0.428014	-0.428014
Rpa3	-0.428094	-0.428094	2.18582	2.09513	-0.428094	-0.428094	-0.428094	-0.428094	-0.428094	-0.428094	-0.428094	-0.428094
Phf14	-0.75768	-0.75768	1.67795	1.64679	1.10023	0.775885	-0.75768	-0.75768	-0.75768	-0.75768	-0.35225	-0.302523
Fam3c	-0.425623	-0.425623	2.38376	1.87247	-0.425623	-0.425623	-0.425623	-0.425623	-0.425623	-0.425623	-0.425623	-0.425623
Asb15	-0.424196	-0.424196	2.43994	1.80202	-0.424196	-0.424196	-0.424196	-0.424196	-0.424196	-0.424196	-0.424196	-0.424196
Opn1sw	-0.424058	-0.424058	2.44469	1.79589	-0.424058	-0.424058	-0.424058	-0.424058	-0.424058	-0.424058	-0.424058	-0.424058
Tmem209	-0.680121	-0.680121	2.142	1.87803	0.161987	0.149178	-0.680121	-0.680121	-0.680121	-0.680121	-0.0035528	-0.246912
Tas2r108	-0.902462	-0.902462	1.36453	1.16518	1.06396	1.15192	-0.902462	-0.902462	-0.902462	-0.902462	0.00980779	0.65938
Tmem139	-0.424669	-0.424669	2.42281	1.82388	-0.424669	-0.424669	-0.424669	-0.424669	-0.424669	-0.424669	-0.424669	-0.424669
Atp6v0e2	-0.426728	-0.426728	2.32622	1.94107	-0.426728	-0.426728	-0.426728	-0.426728	-0.426728	-0.426728	-0.426728	-0.426728
Tra2a	-0.64837	-0.64837	2.02683	1.34114	-0.64837	-0.64837	-0.64837	-0.64837	-0.64837	-0.64837	0.714736	1.10425
Ccdc126	-0.419466	-0.419466	2.56791	1.62676	-0.419466	-0.419466	-0.419466	-0.419466	-0.419466	-0.419466	-0.419466	-0.419466
Fam221a	-1.27006	-1.27006	1.16187	1.09622	0.945323	0.262144	-1.27006	-1.27006	0.56222	-0.0931802	0.410312	0.735317
Hibadh	-0.722751	-0.722751	2.04416	1.89122	-0.0422783	0.00439618	-0.722751	-0.722751	-0.722751	-0.722751	0.141014	0.297995
Tax1bp1	-0.846334	-0.846334	1.59343	1.48292	0.995488	0.958945	-0.846334	-0.846334	-0.846334	-0.846334	-0.138529	0.185759
Fkbp14	-0.427428	-0.427428	2.27555	1.99873	-0.427428	-0.427428	-0.427428	-0.427428	-0.427428	-0.427428	-0.427428	-0.427428
Inmt	-0.53999	-0.53999	2.51771	1.49965	-0.53999	-0.53999	-0.53999	-0.53999	-0.53999	-0.53999	0.281095	0.021464
Avl9	-0.667067	-0.667067	1.71938	0.9359	-0.667067	-0.667067	-0.667067	-0.667067	-0.667067	-0.667067	1.42261	1.25864
Kbtbd2	-0.426241	-0.426241	2.35381	1.90861	-0.426241	-0.426241	-0.426241	-0.426241	-0.426241	-0.426241	-0.426241	-0.426241
Gprin3	-0.508306	-0.508306	2.37915	1.80705	-0.0651834	-0.0545674	-0.508306	-0.508306	-0.508306	-0.508306	-0.508306	-0.508306
Rmnd5a	-1.3044	-1.3044	0.957622	0.292909	0.551892	0.0322092	0.739625	0.886907	-1.3044	-1.3044	0.809454	0.946997
Immt	-0.863759	-0.863759	1.80949	1.42903	0.75595	0.613719	-0.863759	-0.863759	-0.863759	-0.863759	0.0702891	0.504076
Polr1a	-0.428172	-0.428172	2.14913	2.13259	-0.428172	-0.428172	-0.428172	-0.428172	-0.428172	-0.428172	-0.428172	-0.428172
Sh2d6	-0.644373	-0.644373	1.72139	1.669	-0.644373	-0.644373	-0.644373	-0.644373	-0.644373	-0.644373	1.31393	0.450664
Sema4f	-0.424883	-0.424883	2.41463	1.8342	-0.424883	-0.424883	-0.424883	-0.424883	-0.424883	-0.424883	-0.424883	-0.424883
Tlx2	-0.427521	-0.427521	2.26713	2.00808	-0.427521	-0.427521	-0.427521	-0.427521	-0.427521	-0.427521	-0.427521	-0.427521
C87436	-0.426292	-0.426292	2.35113	1.9118	-0.426292	-0.426292	-0.426292	-0.426292	-0.426292	-0.426292	-0.426292	-0.426292
Isy1	-0.427481	-0.427481	2.27081	2.004	-0.427481	-0.427481	-0.427481	-0.427481	-0.427481	-0.427481	-0.427481	-0.427481
Hmces	-1.02855	-1.02855	1.59457	1.37944	1.06892	0.783588	-1.02855	-1.02855	-0.277588	0.378386	-0.318809	-0.494302
Dnajb8	-0.696614	-0.696614	2.17028	1.78575	0.0791188	-0.00970444	-0.696614	-0.696614	-0.696614	-0.696614	-0.215377	0.369616
Eefsec	-0.804786	-0.804786	1.86323	1.2897	1.08827	0.864396	-0.804786	-0.804786	-0.804786	-0.804786	-0.0707973	-0.206076
Sec61a1	-0.868496	-0.868496	1.65137	1.49127	0.27828	0.133665	-0.868496	-0.868496	-0.868496	-0.868496	0.995911	0.660481
Cfap100	-0.428173	-0.428173	2.14587	2.13586	-0.428173	-0.428173	-0.428173	-0.428173	-0.428173	-0.428173	-0.428173	-0.428173
Slc6a6	-0.734799	-0.734799	1.98209	1.74397	0.82416	0.216334	-0.734799	-0.734799	-0.734799	-0.734799	-0.190793	-0.166967
4930590J08Rik	-0.900231	-0.900231	1.57437	1.40806	0.709646	0.917439	-0.900231	-0.900231	-0.900231	-0.900231	0.489278	0.302595
Trh	-1.06756	-1.06756	1.57066	1.49325	-0.321738	-0.254791	-1.06756	-1.06756	1.07159	0.651801	0.0538522	0.00560541
Ppp4r2	-0.813759	-0.813759	1.46064	1.19677	-0.10647	-0.267528	-0.813759	-0.813759	-0.813759	-0.813759	1.2857	1.31343
Cntn3	-0.652099	-0.652099	1.93184	1.49037	1.02891	0.765672	-0.652099	-0.652099	-0.652099	-0.652099	-0.652099	-0.652099
Sumf1	-0.656917	-0.656917	1.85205	1.2791	1.39781	0.726369	-0.656917	-0.656917	-0.656917	-0.656917	-0.656917	-0.656917
Tmcc1	-0.913257	-0.913257	1.58984	1.55116	1.15196	0.894386	-0.913257	-0.913257	-0.285481	-0.382184	-0.425222	-0.441426
Rasgef1a	-0.877788	-0.877788	1.69692	1.48575	0.8236	0.627049	-0.877788	-0.877788	-0.877788	-0.877788	0.411116	0.222288
Adipor2	-0.826357	-0.826357	1.73094	0.738685	1.47613	1.07677	-0.826357	-0.826357	-0.826357	-0.826357	-0.133486	0.0691038
Nanog	-0.577941	-0.577941	2.03118	2.00602	-0.577941	-0.577941	-0.577941	-0.577941	-0.577941	-0.577941	0.348604	0.237715
Necap1	-0.9049	-0.9049	1.40913	1.09165	1.29784	0.95451	-0.9049	-0.9049	-0.9049	-0.9049	0.13144	0.544828
Vmn2r20	-0.609211	-0.609211	2.05912	1.80578	0.401367	0.607416	-0.609211	-0.609211	-0.609211	-0.609211	-0.609211	-0.609211
Smim10l1	-0.663067	-0.663067	1.84221	1.38676	0.960605	1.11496	-0.663067	-0.663067	-0.663067	-0.663067	-0.663067	-0.663067
Gsg1	-0.428095	-0.428095	2.1856	2.09535	-0.428095	-0.428095	-0.428095	-0.428095	-0.428095	-0.428095	-0.428095	-0.428095
Dera	-0.631046	-0.631046	2.00674	1.69355	-0.631046	-0.631046	-0.631046	-0.631046	-0.631046	-0.631046	0.746413	0.601672
Etnk1	-0.425267	-0.425267	2.39916	1.85351	-0.425267	-0.425267	-0.425267	-0.425267	-0.425267	-0.425267	-0.425267	-0.425267
Lrmp	-0.589969	-0.589969	2.07654	1.90235	-0.589969	-0.589969	-0.589969	-0.589969	-0.589969	-0.589969	0.441482	0.299375
Klhl42	-0.546077	-0.546077	2.70903	1.03879	-0.546077	-0.546077	-0.546077	-0.546077	-0.546077	-0.546077	0.353922	0.266878
Amn1	-0.902062	-0.902062	1.44504	1.23788	1.29131	0.771225	-0.902062	-0.902062	-0.902062	-0.902062	0.41275	0.254171
Gp6	-0.423253	-0.423253	2.47082	1.76171	-0.423253	-0.423253	-0.423253	-0.423253	-0.423253	-0.423253	-0.423253	-0.423253
Rdh13	-0.41609	-0.41609	2.63369	1.5272	-0.41609	-0.41609	-0.41609	-0.41609	-0.41609	-0.41609	-0.41609	-0.41609
Rfpl4	-0.615441	-0.615441	2.2535	1.42614	-0.615441	-0.615441	-0.615441	-0.615441	-0.615441	-0.615441	0.416888	0.827
Zfp329	-0.419987	-0.419987	2.55635	1.64352	-0.419987	-0.419987	-0.419987	-0.419987	-0.419987	-0.419987	-0.419987	-0.419987
Nop53	-0.897198	-0.897198	1.6804	1.00385	0.802742	1.20611	-0.897198	-0.897198	-0.897198	-0.897198	0.317169	0.372919
Ccdc9	-0.66866	-0.66866	1.66023	1.24806	-0.66866	-0.66866	-0.66866	-0.66866	1.47535	0.965639	-0.66866	-0.66866
Dact3	-0.418417	-0.418417	2.5899	1.59427	-0.418417	-0.418417	-0.418417	-0.418417	-0.418417	-0.418417	-0.418417	-0.418417
Ceacam5	-0.424352	-0.424352	2.43442	1.8091	-0.424352	-0.424352	-0.424352	-0.424352	-0.424352	-0.424352	-0.424352	-0.424352
Zfp112	-0.567106	-0.567106	2.05986	2.01555	-0.567106	-0.567106	-0.567106	-0.567106	-0.567106	-0.567106	0.317932	0.143508
Phldb3	-0.428099	-0.428099	2.18452	2.09647	-0.428099	-0.428099	-0.428099	-0.428099	-0.428099	-0.428099	-0.428099	-0.428099
Ccdc97	-0.857326	-0.857326	1.59974	1.33807	1.21095	0.868312	-0.857326	-0.857326	-0.857326	-0.857326	-0.013816	0.140695
Shkbp1	-0.427967	-0.427967	2.21282	2.06685	-0.427967	-0.427967	-0.427967	-0.427967	-0.427967	-0.427967	-0.427967	-0.427967
Psmc4	-0.863434	-0.863434	1.47053	1.30119	0.908805	1.35453	-0.863434	-0.863434	-0.863434	-0.863434	0.0789373	0.0666133
Eid2b	-0.420751	-0.420751	2.53856	1.66895	-0.420751	-0.420751	-0.420751	-0.420751	-0.420751	-0.420751	-0.420751	-0.420751
Timm50	-0.428066	-0.428066	2.19313	2.08753	-0.428066	-0.428066	-0.428066	-0.428066	-0.428066	-0.428066	-0.428066	-0.428066
Supt5	-0.892812	-0.892812	1.82416	1.20917	0.445703	0.588576	-0.892812	-0.892812	-0.892812	-0.892812	0.805102	0.484159
Nccrp1	-0.895422	-0.895422	1.63174	1.09773	0.852349	0.764614	-0.895422	-0.895422	-0.895422	-0.895422	0.0210312	1.00506
Fbxo17	-0.420922	-0.420922	2.53442	1.6748	-0.420922	-0.420922	-0.420922	-0.420922	-0.420922	-0.420922	-0.420922	-0.420922
Yif1b	-0.851874	-0.851874	2.13103	0.878801	0.914461	0.522649	-0.851874	-0.851874	-0.851874	-0.851874	0.365649	0.298655
Capns1	-0.60221	-0.60221	2.24336	1.61266	0.442134	0.519519	-0.60221	-0.60221	-0.60221	-0.60221	-0.60221	-0.60221
Proser3	-0.854962	-0.854962	1.73058	0.65544	1.42196	0.969015	-0.854962	-0.854962	-0.854962	-0.854962	-0.11217	0.464945
Scgb1b29	-0.422555	-0.422555	2.49148	1.73407	-0.422555	-0.422555	-0.422555	-0.422555	-0.422555	-0.422555	-0.422555	-0.422555
Zfp977	-0.861914	-0.861914	1.43305	1.23711	-0.0166898	0.106712	-0.861914	-0.861914	-0.861914	-0.861914	1.06475	1.34654
Zfp975	-0.837463	-0.837463	1.50064	1.20226	1.41785	1.01343	-0.837463	-0.837463	-0.837463	-0.837463	-0.214821	0.105422
Zfp819	-0.669503	-0.669503	1.58674	1.32773	1.49728	0.944277	-0.669503	-0.669503	-0.669503	-0.669503	-0.669503	-0.669503
Myh14	-0.606385	-0.606385	2.18154	1.56249	-0.606385	-0.606385	-0.606385	-0.606385	-0.606385	-0.606385	0.903596	0.203456
Snrnp70	-0.583336	-0.583336	2.00934	2.00217	0.419779	0.235404	-0.583336	-0.583336	-0.583336	-0.583336	-0.583336	-0.583336
Nucb1	-0.661712	-0.661712	1.82536	0.88377	1.44078	1.14379	-0.661712	-0.661712	-0.661712	-0.661712	-0.661712	-0.661712
Ldha	-0.785099	-0.785099	1.8139	1.7718	0.854571	0.075902	-0.785099	-0.785099	-0.785099	-0.785099	-0.144908	0.339324
Csrp3	-0.426835	-0.426835	2.31952	1.94883	-0.426835	-0.426835	-0.426835	-0.426835	-0.426835	-0.426835	-0.426835	-0.426835
E030018B13Rik	-0.645335	-0.645335	1.87277	1.66625	-0.645335	-0.645335	-0.645335	-0.645335	-0.645335	-0.645335	0.994219	0.629436
Klf13	-0.428138	-0.428138	2.17113	2.11025	-0.428138	-0.428138	-0.428138	-0.428138	-0.428138	-0.428138	-0.428138	-0.428138
Mtmr10	-0.654739	-0.654739	1.60196	1.57623	1.47624	0.583479	-0.654739	-0.654739	-0.654739	-0.654739	-0.654739	-0.654739
Nsmce3	-1.46067	-1.46067	2.16194	0.934547	0.364175	-0.297467	-0.570091	-0.00320017	-0.235749	-0.371096	0.414846	0.523441
Synm	-0.721173	-0.721173	1.94048	1.93586	-0.0585854	-0.132567	-0.721173	-0.721173	-0.721173	-0.721173	0.0568775	0.584977
Pgpep1l	-0.842802	-0.842802	1.72346	1.60664	0.276566	-0.0246573	-0.842802	-0.842802	-0.842802	-0.842802	0.84201	0.63279
Isg20	-0.630015	-0.630015	1.87815	1.85232	-0.630015	-0.630015	-0.630015	-0.630015	-0.630015	-0.630015	0.720116	0.589538
Rlbp1	-0.649394	-0.649394	1.79675	1.69376	-0.649394	-0.649394	-0.649394	-0.649394	-0.649394	-0.649394	1.04761	0.657036
Wdr93	-0.633696	-0.633696	2.24724	1.05046	0.706868	1.065	-0.633696	-0.633696	-0.633696	-0.633696	-0.633696	-0.633696
Ttll13	-0.427926	-0.427926	2.21949	2.05977	-0.427926	-0.427926	-0.427926	-0.427926	-0.427926	-0.427926	-0.427926	-0.427926
Iqgap1	-0.675405	-0.675405	2.37485	1.49291	0.337812	0.359543	-0.675405	-0.675405	-0.675405	-0.675405	-0.354961	-0.157731
Olfr292	-0.660478	-0.660478	1.83825	1.35359	1.28113	0.810856	-0.660478	-0.660478	-0.660478	-0.660478	-0.660478	-0.660478
Pcf11	-0.870443	-0.870443	1.44546	1.41275	1.41054	0.396175	-0.870443	-0.870443	-0.870443	-0.870443	0.096321	0.461405
Ddias	-0.66485	-0.66485	1.70978	1.36152	1.40755	0.83994	-0.66485	-0.66485	-0.66485	-0.66485	-0.66485	-0.66485
Gucy2d	-0.877587	-0.877587	1.55631	1.52219	0.668129	1.0349	-0.877587	-0.877587	-0.877587	-0.877587	0.190286	0.293705
Wnt11	-0.837022	-0.837022	1.82341	1.67291	-0.837022	-0.837022	-0.837022	-0.837022	0.298953	0.631508	0.236347	0.359002
Neu3	-0.602991	-0.602991	2.01061	1.90369	-0.602991	-0.602991	-0.602991	-0.602991	-0.602991	-0.602991	0.528709	0.380922
Ucp3	-0.896388	-0.896388	1.41467	1.12721	1.182	1.09346	-0.896388	-0.896388	-0.896388	-0.896388	0.560587	0.000398625
P2ry6	-0.428174	-0.428174	2.14141	2.14034	-0.428174	-0.428174	-0.428174	-0.428174	-0.428174	-0.428174	-0.428174	-0.428174
Atg16l2	-0.886255	-0.886255	1.55928	1.08125	1.33038	0.76465	-0.886255	-0.886255	-0.886255	-0.886255	0.00557973	0.576392
Tomt	-0.613107	-0.613107	2.14191	1.41471	1.17148	0.176759	-0.613107	-0.613107	-0.613107	-0.613107	-0.613107	-0.613107
Olfr583	-0.588139	-0.588139	2.18641	1.77949	-0.588139	-0.588139	-0.588139	-0.588139	-0.588139	-0.588139	0.290485	0.448723
Olfr655	-0.672198	-0.672198	1.65256	1.28697	1.33283	1.10522	-0.672198	-0.672198	-0.672198	-0.672198	-0.672198	-0.672198
Cavin3	-0.428127	-0.428127	2.17541	2.10586	-0.428127	-0.428127	-0.428127	-0.428127	-0.428127	-0.428127	-0.428127	-0.428127
Hpx	-0.42674	-0.42674	2.32552	1.94188	-0.42674	-0.42674	-0.42674	-0.42674	-0.42674	-0.42674	-0.42674	-0.42674
Tmem41b	-0.613787	-0.613787	2.08898	1.74363	-0.613787	-0.613787	-0.613787	-0.613787	-0.613787	-0.613787	0.564675	0.513011
Eif4g2	-0.426672	-0.426672	2.32962	1.9371	-0.426672	-0.426672	-0.426672	-0.426672	-0.426672	-0.426672	-0.426672	-0.426672
Rassf10	-0.561361	-0.561361	2.13213	1.95753	0.0991083	0.302119	-0.561361	-0.561361	-0.561361	-0.561361	-0.561361	-0.561361
Ccp110	-0.428166	-0.428166	2.15556	2.1261	-0.428166	-0.428166	-0.428166	-0.428166	-0.428166	-0.428166	-0.428166	-0.428166
Knop1	-1.2519	-1.2519	1.47983	0.398729	0.38539	-0.132499	-1.2519	-1.2519	0.874909	0.550736	0.507017	0.943494
Thumpd1	-0.623783	-0.623783	2.19573	1.34164	1.05084	0.402053	-0.623783	-0.623783	-0.623783	-0.623783	-0.623783	-0.623783
Polr3e	-0.881217	-0.881217	1.49675	1.14328	0.946046	0.739203	-0.881217	-0.881217	-0.881217	-0.881217	-0.185777	1.14781
Ubfd1	-1.00652	-1.00652	1.60267	1.25882	1.36403	0.744205	0.107593	-0.342441	-1.00652	-1.00652	-0.351019	-0.35778
Tnrc6a	-0.731854	-0.731854	2.02267	1.82904	0.501484	0.168536	-0.731854	-0.731854	-0.731854	-0.731854	0.109776	-0.240391
Arhgap17	-0.666653	-0.666653	1.56562	1.40557	-0.666653	-0.666653	-0.666653	-0.666653	-0.666653	-0.666653	0.843229	1.5188
Tial1	-0.618637	-0.618637	1.95924	1.85485	-0.618637	-0.618637	-0.618637	-0.618637	-0.618637	-0.618637	0.480628	0.654376
Tacc2	-0.726132	-0.726132	1.99349	1.94347	0.0627744	0.2422	-0.726132	-0.726132	-0.726132	-0.726132	0.147275	-0.032413
Ikzf5	-0.42426	-0.42426	2.43769	1.80491	-0.42426	-0.42426	-0.42426	-0.42426	-0.42426	-0.42426	-0.42426	-0.42426
Zranb1	-0.65258	-0.65258	1.61254	1.60298	1.457	0.548126	-0.65258	-0.65258	-0.65258	-0.65258	-0.65258	-0.65258
Bnip3	-0.639207	-0.639207	2.11381	1.99406	-0.0314969	0.131907	-0.639207	-0.639207	-0.639207	-0.639207	-0.276168	-0.0968659
Inpp5a	-0.919038	-0.919038	1.81703	0.982375	1.47073	0.775426	-0.919038	-0.919038	-0.0735419	-0.505835	-0.487609	-0.302419
Msx3	-0.652629	-0.652629	1.83365	0.701741	1.59931	1.08633	-0.652629	-0.652629	-0.652629	-0.652629	-0.652629	-0.652629
Rnh1	-0.425028	-0.425028	2.40894	1.84134	-0.425028	-0.425028	-0.425028	-0.425028	-0.425028	-0.425028	-0.425028	-0.425028
Tollip	-0.428152	-0.428152	2.16501	2.1165	-0.428152	-0.428152	-0.428152	-0.428152	-0.428152	-0.428152	-0.428152	-0.428152
Mob2	-0.876879	-0.876879	1.98685	0.56524	1.13195	0.541769	-0.876879	-0.876879	-0.876879	-0.876879	0.582963	0.452495
Krtap5-5	-1.27921	-1.27921	1.15428	0.684351	0.623529	0.336661	1.09092	0.710569	-1.27921	-1.27921	-0.143786	0.660311
Ccnd1	-1.23282	-1.23282	1.72683	0.531413	0.632093	0.517638	-1.23282	-1.23282	0.685423	0.684723	-0.0619568	0.215116
Col4a2	-0.577351	-0.577351	2.12421	1.8926	0.471205	0.130795	-0.577351	-0.577351	-0.577351	-0.577351	-0.577351	-0.577351
Naxd	-0.598364	-0.598364	2.14196	1.78124	0.401333	0.462372	-0.598364	-0.598364	-0.598364	-0.598364	-0.598364	-0.598364
Ing1	-0.524648	-0.524648	2.21286	1.9684	-0.524648	-0.524648	-0.524648	-0.524648	-0.524648	-0.524648	-0.107069	0.122984
Spaca7	-0.67123	-0.67123	1.66555	1.38262	1.24697	1.07469	-0.67123	-0.67123	-0.67123	-0.67123	-0.67123	-0.67123
Cul4a	-0.427359	-0.427359	2.28148	1.99211	-0.427359	-0.427359	-0.427359	-0.427359	-0.427359	-0.427359	-0.427359	-0.427359
Atp4b	-0.66395	-0.66395	1.6508	1.22131	1.59463	0.844856	-0.66395	-0.66395	-0.66395	-0.66395	-0.66395	-0.66395
Grk1	-0.42815	-0.42815	2.16594	2.11555	-0.42815	-0.42815	-0.42815	-0.42815	-0.42815	-0.42815	-0.42815	-0.42815
Erich1	-0.417172	-0.417172	2.6141	1.55762	-0.417172	-0.417172	-0.417172	-0.417172	-0.417172	-0.417172	-0.417172	-0.417172
Nek3	-0.607239	-0.607239	2.69624	1.14636	0.207175	0.12567	-0.607239	-0.607239	-0.607239	-0.607239	-0.224286	-0.307726
Tpte	-0.648272	-0.648272	1.77635	1.50866	1.39738	0.503789	-0.648272	-0.648272	-0.648272	-0.648272	-0.648272	-0.648272
Vdac3	-0.710937	-0.710937	1.95737	1.59741	0.842433	0.710949	-0.710937	-0.710937	-0.710937	-0.710937	-0.336625	-0.505912
Nkx6-3	-0.593376	-0.593376	1.99429	1.97562	-0.593376	-0.593376	-0.593376	-0.593376	-0.593376	-0.593376	0.365871	0.41123
Adam32	-0.398723	-0.398723	2.84836	1.13887	-0.398723	-0.398723	-0.398723	-0.398723	-0.398723	-0.398723	-0.398723	-0.398723
Star	-0.427245	-0.427245	2.2907	1.98175	-0.427245	-0.427245	-0.427245	-0.427245	-0.427245	-0.427245	-0.427245	-0.427245
Brf2	-0.288675	-0.288675	3.17543	-0.288675	-0.288675	-0.288675	-0.288675	-0.288675	-0.288675	-0.288675	-0.288675	-0.288675
Rnf122	-0.841644	-0.841644	1.94546	1.20517	0.735035	0.81586	-0.841644	-0.841644	-0.841644	-0.841644	-0.176526	0.524861
Tex15	-0.642542	-0.642542	1.98525	1.57967	0.688748	0.886671	-0.642542	-0.642542	-0.642542	-0.642542	-0.642542	-0.642542
Lonrf1	-0.42674	-0.42674	2.32552	1.94188	-0.42674	-0.42674	-0.42674	-0.42674	-0.42674	-0.42674	-0.42674	-0.42674
Mtus1	-0.716381	-0.716381	1.98282	1.96605	0.292776	0.157413	-0.716381	-0.716381	-0.716381	-0.716381	-0.114705	0.0139269
Aga	-1.27348	-1.27348	1.19161	1.04261	0.366923	0.27331	-1.27348	-1.27348	1.11264	0.436332	0.603099	0.067407
Clcn3	-0.898708	-0.898708	1.56725	1.22832	1.06512	0.88263	-0.898708	-0.898708	-0.898708	-0.898708	0.144426	0.5045
Slc18a1	-0.649737	-0.649737	1.74038	1.36883	1.56338	0.525299	-0.649737	-0.649737	-0.649737	-0.649737	-0.649737	-0.649737
Lzts1	-0.426914	-0.426914	2.31439	1.95475	-0.426914	-0.426914	-0.426914	-0.426914	-0.426914	-0.426914	-0.426914	-0.426914
Zfp866	-0.428172	-0.428172	2.14797	2.13376	-0.428172	-0.428172	-0.428172	-0.428172	-0.428172	-0.428172	-0.428172	-0.428172
Sugp1	-0.428143	-0.428143	2.16905	2.11238	-0.428143	-0.428143	-0.428143	-0.428143	-0.428143	-0.428143	-0.428143	-0.428143
Use1	-0.744571	-0.744571	2.06484	1.7137	0.68106	0.0819247	-0.744571	-0.744571	-0.744571	-0.744571	-0.0422457	-0.0318502
Jak3	-0.847363	-0.847363	1.96503	0.895309	1.24876	0.502867	-0.847363	-0.847363	-0.847363	-0.847363	0.00679402	0.465419
B3gnt3	-0.411165	-0.411165	2.71027	1.40139	-0.411165	-0.411165	-0.411165	-0.411165	-0.411165	-0.411165	-0.411165	-0.411165
Mcm5	-0.872226	-0.872226	1.69969	0.446519	1.44389	0.94577	-0.872226	-0.872226	-0.872226	-0.872226	0.598217	0.0992784
Abce1	-0.929439	-0.929439	2.01296	1.7464	0.238671	0.197158	0.00499347	0.217488	-0.929439	-0.929439	-0.184841	-0.515079
Tbc1d9	-0.426227	-0.426227	2.35457	1.9077	-0.426227	-0.426227	-0.426227	-0.426227	-0.426227	-0.426227	-0.426227	-0.426227
Gm10644	-0.423417	-0.423417	2.46571	1.76846	-0.423417	-0.423417	-0.423417	-0.423417	-0.423417	-0.423417	-0.423417	-0.423417
Trmt1	-0.426039	-0.426039	2.36414	1.89625	-0.426039	-0.426039	-0.426039	-0.426039	-0.426039	-0.426039	-0.426039	-0.426039
Lyl1	-0.63217	-0.63217	1.87736	1.57351	-0.63217	-0.63217	-0.63217	-0.63217	-0.63217	-0.63217	0.29725	1.30925
Lonp2	-0.581675	-0.581675	2.206	1.79126	0.366436	0.289708	-0.581675	-0.581675	-0.581675	-0.581675	-0.581675	-0.581675
Zfp423	-0.835392	-0.835392	1.74506	1.69121	0.286368	0.118425	-0.835392	-0.835392	-0.835392	-0.835392	0.335356	0.835932
Heatr3	-0.428026	-0.428026	2.2019	2.07836	-0.428026	-0.428026	-0.428026	-0.428026	-0.428026	-0.428026	-0.428026	-0.428026
Ogfod1	-0.829339	-0.829339	1.95526	0.512223	0.67144	1.51123	-0.829339	-0.829339	-0.829339	-0.829339	0.158984	0.166904
Mt1	-0.82673	-0.82673	1.791	1.77656	0.302719	0.335995	-0.82673	-0.82673	-0.82673	-0.82673	0.529405	0.224708
Mmp15	-0.864605	-0.864605	1.92605	1.23663	0.491765	0.907448	-0.864605	-0.864605	-0.864605	-0.864605	0.226996	0.398742
Ndrg4	-0.632367	-0.632367	1.91195	1.79671	-0.632367	-0.632367	-0.632367	-0.632367	-0.632367	-0.632367	0.622471	0.727804
Cdh8	-0.900697	-0.900697	1.76827	1.21309	0.537112	0.535013	-0.900697	-0.900697	0.521757	0.828936	-0.900697	-0.900697
D230025D16Rik	-0.859143	-0.859143	1.79497	1.58832	0.474718	0.34014	-0.859143	-0.859143	-0.859143	-0.859143	0.3603	0.596417
Zfp821	-0.644932	-0.644932	2.11225	1.18474	1.12216	0.740305	-0.644932	-0.644932	-0.644932	-0.644932	-0.644932	-0.644932
Marveld3	-0.793262	-0.793262	1.89829	1.37767	1.27201	0.300265	-0.793262	-0.793262	-0.793262	-0.793262	0.0292059	-0.117878
Bcar1	-0.88729	-0.88729	2.06685	1.87835	-0.0262969	-0.0699547	-0.88729	-0.88729	-0.0519945	-0.198423	-0.0557481	0.0063774
Adat1	-0.665089	-0.665089	1.59195	1.56223	0.819211	1.34732	-0.665089	-0.665089	-0.665089	-0.665089	-0.665089	-0.665089
Kcng4	-0.427948	-0.427948	2.21594	2.06354	-0.427948	-0.427948	-0.427948	-0.427948	-0.427948	-0.427948	-0.427948	-0.427948
Wfdc1	-0.805354	-0.805354	2.07056	1.30668	0.967491	0.418768	-0.805354	-0.805354	-0.805354	-0.805354	0.0289842	0.039642
Mthfsd	-0.427952	-0.427952	2.21536	2.06415	-0.427952	-0.427952	-0.427952	-0.427952	-0.427952	-0.427952	-0.427952	-0.427952
Trappc2l	-0.421041	-0.421041	2.53151	1.6789	-0.421041	-0.421041	-0.421041	-0.421041	-0.421041	-0.421041	-0.421041	-0.421041
Pabpn1l	-0.851678	-0.851678	1.71526	1.57206	0.314451	0.00143551	-0.851678	-0.851678	-0.851678	-0.851678	0.744111	0.762749
Nup133	-0.427827	-0.427827	2.23356	2.04472	-0.427827	-0.427827	-0.427827	-0.427827	-0.427827	-0.427827	-0.427827	-0.427827
Kcnk1	-0.790832	-0.790832	1.58408	1.44618	1.0924	1.14679	-0.790832	-0.790832	-0.790832	-0.790832	-0.281577	-0.242888
Coa6	-0.657752	-0.657752	1.64401	1.56814	1.39648	0.653394	-0.657752	-0.657752	-0.657752	-0.657752	-0.657752	-0.657752
Irf2bp2	-1.16996	-1.16996	1.70975	1.38242	0.494061	0.192159	-1.16996	-1.16996	0.157459	-0.117258	0.426502	0.434738
Cwf19l2	-0.572601	-0.572601	2.02827	2.01295	0.450867	0.0887194	-0.572601	-0.572601	-0.572601	-0.572601	-0.572601	-0.572601
Gria4	-0.92062	-0.92062	1.57068	1.03514	0.947487	0.41804	-0.92062	-0.92062	-0.92062	-0.92062	0.998429	0.553936
Dcun1d5	-0.974291	-0.974291	1.4576	1.45176	1.33548	0.683601	-0.974291	-0.974291	-0.51399	-0.603884	-0.16575	0.252347
Maml2	-0.661165	-0.661165	1.82686	1.37435	0.82437	1.26374	-0.661165	-0.661165	-0.661165	-0.661165	-0.661165	-0.661165
Mtmr2	-0.941271	-0.941271	1.27182	0.89211	0.85727	0.509954	-0.941271	-0.941271	-0.941271	-0.941271	1.19236	0.924117
Mre11a	-0.641685	-0.641685	2.06284	1.47643	-0.641685	-0.641685	-0.641685	-0.641685	-0.641685	-0.641685	0.798607	0.795604
4931406C07Rik	-0.644496	-0.644496	1.86169	1.6297	1.12363	0.540942	-0.644496	-0.644496	-0.644496	-0.644496	-0.644496	-0.644496
Cep295	-0.874663	-0.874663	1.66895	1.53512	0.903262	0.406744	-0.874663	-0.874663	-0.874663	-0.874663	0.274255	0.459651
Mbd3l2	-0.427989	-0.427989	2.20904	2.07085	-0.427989	-0.427989	-0.427989	-0.427989	-0.427989	-0.427989	-0.427989	-0.427989
Icam4	-0.427992	-0.427992	2.2084	2.07152	-0.427992	-0.427992	-0.427992	-0.427992	-0.427992	-0.427992	-0.427992	-0.427992
Zglp1	-0.426876	-0.426876	2.31686	1.9519	-0.426876	-0.426876	-0.426876	-0.426876	-0.426876	-0.426876	-0.426876	-0.426876
Cdkn2d	-0.60627	-0.60627	1.98084	1.55627	-0.60627	-0.60627	-0.60627	-0.60627	-0.60627	-0.60627	0.00393623	1.30912
Dnm2	-0.428123	-0.428123	2.17711	2.10412	-0.428123	-0.428123	-0.428123	-0.428123	-0.428123	-0.428123	-0.428123	-0.428123
Kank2	-0.860572	-0.860572	1.99374	1.20179	0.517304	0.816693	-0.860572	-0.860572	-0.860572	-0.860572	0.288045	0.345856
Rp9	-0.521825	-0.521825	2.24175	1.93053	0.18719	-0.184863	-0.521825	-0.521825	-0.521825	-0.521825	-0.521825	-0.521825
Glb1l2	-0.428158	-0.428158	2.16121	2.12038	-0.428158	-0.428158	-0.428158	-0.428158	-0.428158	-0.428158	-0.428158	-0.428158
Nfrkb	-0.938457	-0.938457	1.40282	1.00158	0.732957	1.13059	-0.938457	-0.938457	-0.938457	-0.938457	0.699521	0.66327
Acrv1	-0.427952	-0.427952	2.21536	2.06415	-0.427952	-0.427952	-0.427952	-0.427952	-0.427952	-0.427952	-0.427952	-0.427952
Slc37a2	-0.619223	-0.619223	2.36535	1.00554	0.983438	0.599452	-0.619223	-0.619223	-0.619223	-0.619223	-0.619223	-0.619223
Hepacam	-0.871701	-0.871701	1.91505	0.705051	0.562664	1.28243	-0.871701	-0.871701	-0.871701	-0.871701	0.488465	0.27654
Msantd2	-0.651482	-0.651482	2.01147	1.23347	-0.651482	-0.651482	-0.651482	-0.651482	-0.651482	-0.651482	1.2101	0.756807
Cbl	-0.427161	-0.427161	2.29709	1.97451	-0.427161	-0.427161	-0.427161	-0.427161	-0.427161	-0.427161	-0.427161	-0.427161
Fxyd2	-0.61108	-0.61108	2.44839	0.842755	0.924879	0.67262	-0.61108	-0.61108	-0.61108	-0.61108	-0.61108	-0.61108
Nnmt	-0.666894	-0.666894	1.80555	1.04203	-0.666894	-0.666894	-0.666894	-0.666894	-0.666894	-0.666894	1.21071	1.27685
Atm	-0.424633	-0.424633	2.42415	1.82218	-0.424633	-0.424633	-0.424633	-0.424633	-0.424633	-0.424633	-0.424633	-0.424633
Npat	-0.915422	-0.915422	1.36842	1.32259	1.11581	0.268497	-0.915422	-0.915422	-0.915422	-0.915422	0.588573	0.828644
Fbxo22	-0.807494	-0.807494	2.27855	0.778956	0.0944981	1.02124	-0.807494	-0.807494	-0.807494	-0.807494	0.259407	0.412314
Edc3	-0.590544	-0.590544	2.375	1.47772	0.490107	0.381521	-0.590544	-0.590544	-0.590544	-0.590544	-0.590544	-0.590544
Islr2	-0.58072	-0.58072	2.08549	1.8939	0.601478	0.0648908	-0.58072	-0.58072	-0.58072	-0.58072	-0.58072	-0.58072
Loxl1	-0.820021	-0.820021	1.50507	1.37536	1.08835	1.23159	-0.820021	-0.820021	-0.820021	-0.820021	-0.324441	0.044192
Rec114	-0.927972	-0.927972	1.30251	1.13802	1.22554	0.792007	-0.927972	-0.927972	-0.927972	-0.927972	0.335117	0.774645
Hcn4	-0.428152	-0.428152	2.16501	2.1165	-0.428152	-0.428152	-0.428152	-0.428152	-0.428152	-0.428152	-0.428152	-0.428152
Lrrc49	-1.56292	-1.56292	1.66624	1.32539	0.469923	-0.502876	-0.535854	-0.0469622	-0.0133591	-0.082769	0.899233	-0.0531155
Itga11	-0.846867	-0.846867	1.63791	1.52223	-0.0489253	0.147859	-0.846867	-0.846867	-0.846867	-0.846867	0.831541	0.990594
Map2k5	-0.649319	-0.649319	1.74351	1.27691	1.63173	0.5424	-0.649319	-0.649319	-0.649319	-0.649319	-0.649319	-0.649319
Dpp8	-0.613882	-0.613882	1.84097	1.14668	1.8077	0.115711	-0.613882	-0.613882	-0.613882	-0.613882	-0.613882	-0.613882
Clpx	-0.847837	-0.847837	1.96247	0.832045	1.06239	0.992969	-0.847837	-0.847837	-0.847837	-0.847837	0.100192	0.136955
Mtfmt	-0.866066	-0.866066	1.93698	1.01274	0.850512	0.940461	-0.866066	-0.866066	-0.866066	-0.866066	0.155811	0.299887
Herc1	-1.26548	-1.26548	1.7103	1.70432	-0.850547	-0.823584	0.126056	-0.211856	0.632246	-0.065241	-0.00813561	0.317402
Fbxl22	-0.771422	-0.771422	1.95833	1.83468	0.385998	0.0833081	-0.771422	-0.771422	-0.771422	-0.771422	0.131384	0.234828
Aph1b	-0.709657	-0.709657	1.96007	1.95993	0.251796	0.284341	-0.709657	-0.709657	-0.709657	-0.709657	-0.355245	0.157051
C2cd4a	-0.606353	-0.606353	2.10453	1.74967	0.687643	0.308983	-0.606353	-0.606353	-0.606353	-0.606353	-0.606353	-0.606353
Ccnb2	-0.856148	-0.856148	1.65605	1.56678	0.305665	-0.00991252	-0.856148	-0.856148	-0.856148	-0.856148	0.839049	0.779264
Myzap	-0.425641	-0.425641	2.38296	1.87344	-0.425641	-0.425641	-0.425641	-0.425641	-0.425641	-0.425641	-0.425641	-0.425641
Prtg	-0.651281	-0.651281	1.82433	1.68058	-0.651281	-0.651281	-0.651281	-0.651281	-0.651281	-0.651281	0.847584	0.857756
Leo1	-0.54303	-0.54303	2.28637	1.83787	-0.54303	-0.54303	-0.54303	-0.54303	-0.54303	-0.54303	0.0341261	0.185875
Fbxo9	-0.766027	-0.766027	1.89525	1.79418	0.806876	-0.0547831	-0.766027	-0.766027	-0.766027	-0.766027	0.110031	0.044604
Pcolce2	-0.611837	-0.611837	2.29058	1.41816	-0.611837	-0.611837	-0.611837	-0.611837	-0.611837	-0.611837	0.741421	0.444538
Atp1b3	-0.873141	-0.873141	1.62601	1.60576	0.622219	0.119963	-0.873141	-0.873141	-0.873141	-0.873141	0.602082	0.662803
Rnf7	-0.89486	-0.89486	1.43309	1.29792	1.28247	0.815631	-0.89486	-0.89486	-0.89486	-0.89486	0.294377	0.24567
Mrps22	-0.891366	-0.891366	1.46707	0.709648	0.776915	-0.0431731	-0.891366	-0.891366	1.22808	1.20965	-0.891366	-0.891366
Faim	-0.778648	-0.778648	1.84875	1.83426	0.693233	0.314577	-0.778648	-0.778648	-0.778648	-0.778648	-0.00052618	-0.0184055
Esyt3	-0.427413	-0.427413	2.27683	1.99731	-0.427413	-0.427413	-0.427413	-0.427413	-0.427413	-0.427413	-0.427413	-0.427413
Mras	-0.422832	-0.422832	2.48346	1.74486	-0.422832	-0.422832	-0.422832	-0.422832	-0.422832	-0.422832	-0.422832	-0.422832
Cdv3	-0.388413	-0.388413	2.92901	0.955122	-0.388413	-0.388413	-0.388413	-0.388413	-0.388413	-0.388413	-0.388413	-0.388413
Dcaf1	-0.858937	-0.858937	1.78598	1.35975	0.820466	0.667354	-0.858937	-0.858937	-0.858937	-0.858937	-0.114765	0.634839
Sema3f	-0.931197	-0.931197	1.49154	1.0818	0.908881	0.466046	-0.931197	-0.931197	-0.931197	-0.931197	0.730112	0.908798
Ucn2	-0.428132	-0.428132	2.17364	2.10768	-0.428132	-0.428132	-0.428132	-0.428132	-0.428132	-0.428132	-0.428132	-0.428132
Prss42	-0.652766	-0.652766	1.81972	1.61694	1.08162	0.703851	-0.652766	-0.652766	-0.652766	-0.652766	-0.652766	-0.652766
Fbxl2	-0.645714	-0.645714	2.12389	1.22515	0.942743	0.873928	-0.645714	-0.645714	-0.645714	-0.645714	-0.645714	-0.645714
Crtap	-0.426431	-0.426431	2.34355	1.92077	-0.426431	-0.426431	-0.426431	-0.426431	-0.426431	-0.426431	-0.426431	-0.426431
Exog	-0.867157	-0.867157	1.63801	1.46464	-0.867157	-0.867157	-0.867157	-0.867157	0.46199	-0.00975477	1.0343	0.613761
Pomgnt2	-0.836317	-0.836317	1.88716	1.25333	1.08839	0.680318	-0.836317	-0.836317	-0.836317	-0.836317	-0.0403055	0.149014
Zfp445	-0.885888	-0.885888	1.71453	0.809655	1.15986	1.08765	-0.885888	-0.885888	-0.885888	-0.885888	0.171703	0.371931
Tmem42	-0.428141	-0.428141	2.16981	2.1116	-0.428141	-0.428141	-0.428141	-0.428141	-0.428141	-0.428141	-0.428141	-0.428141
Cdcp1	-0.425812	-0.425812	2.3751	1.88302	-0.425812	-0.425812	-0.425812	-0.425812	-0.425812	-0.425812	-0.425812	-0.425812
Bmp15	-0.421593	-0.421593	2.51758	1.69835	-0.421593	-0.421593	-0.421593	-0.421593	-0.421593	-0.421593	-0.421593	-0.421593
Sowahd	-0.669167	-0.669167	1.54874	1.43705	1.45889	0.908652	-0.669167	-0.669167	-0.669167	-0.669167	-0.669167	-0.669167
Cypt14	-0.594332	-0.594332	2.3413	1.50368	-0.594332	-0.594332	-0.594332	-0.594332	-0.594332	-0.594332	0.54884	0.360833
Apln	-0.427705	-0.427705	2.24826	2.02879	-0.427705	-0.427705	-0.427705	-0.427705	-0.427705	-0.427705	-0.427705	-0.427705
Elf4	-0.420559	-0.420559	2.54315	1.66243	-0.420559	-0.420559	-0.420559	-0.420559	-0.420559	-0.420559	-0.420559	-0.420559
Gm7073	-0.426965	-0.426965	2.311	1.95865	-0.426965	-0.426965	-0.426965	-0.426965	-0.426965	-0.426965	-0.426965	-0.426965
Obp1a	-0.422806	-0.422806	2.48425	1.74381	-0.422806	-0.422806	-0.422806	-0.422806	-0.422806	-0.422806	-0.422806	-0.422806
Mageb16	-0.673852	-0.673852	1.50752	1.50206	-0.673852	-0.673852	-0.673852	-0.673852	-0.673852	-0.673852	1.23215	1.14909
Zfx	-0.648418	-0.648418	1.96567	1.50783	0.980193	0.733657	-0.648418	-0.648418	-0.648418	-0.648418	-0.648418	-0.648418
Ogt	-0.428117	-0.428117	2.1789	2.10227	-0.428117	-0.428117	-0.428117	-0.428117	-0.428117	-0.428117	-0.428117	-0.428117
Pcdh19	-0.673127	-0.673127	1.47817	1.44279	1.42281	1.04124	-0.673127	-0.673127	-0.673127	-0.673127	-0.673127	-0.673127
Cenpi	-0.427705	-0.427705	2.24826	2.02879	-0.427705	-0.427705	-0.427705	-0.427705	-0.427705	-0.427705	-0.427705	-0.427705
Smc1a	-0.427117	-0.427117	2.30032	1.97084	-0.427117	-0.427117	-0.427117	-0.427117	-0.427117	-0.427117	-0.427117	-0.427117
Samt4	-0.654357	-0.654357	1.82193	1.51456	1.23143	0.666947	-0.654357	-0.654357	-0.654357	-0.654357	-0.654357	-0.654357
Nhs	-0.427532	-0.427532	2.26604	2.00929	-0.427532	-0.427532	-0.427532	-0.427532	-0.427532	-0.427532	-0.427532	-0.427532
Rp1	-0.253513	-0.0412667	0.96974	2.07226	-0.264027	-0.411549	-1.42692	-1.42692	-0.0663521	-0.590269	0.72894	0.709867
Alkal1	0.613464	-0.15775	0.843801	1.62346	1.32992	0.668182	-1.10341	-1.10341	-1.10341	-1.10341	-0.390068	-0.117357
Ncoa2	-0.432577	-0.428887	0.530658	1.35689	1.29324	1.04968	-1.12715	-1.12715	-1.12715	-1.12715	0.550979	0.588602
Terf1	-0.475	-0.666449	1.68105	1.71115	0.733882	0.128391	-1.12493	-1.12493	-0.685582	-0.858491	0.180173	0.500741
Jph1	0.531829	1.21707	1.3298	1.48961	-0.06911	0.549756	-1.07892	-1.07892	-1.07892	-1.07892	-0.276006	-0.457269
Crisp4	-0.163469	-0.714854	0.828419	1.45411	0.77952	0.76827	-1.72829	-1.72829	0.106087	-0.336602	0.149618	0.585471
B3gat2	1.52802	1.1074	1.02983	1.67668	-0.667741	-0.667741	-0.667741	-0.667741	-0.667741	-0.667741	-0.667741	-0.667741
Smap1	0.183928	-0.0971715	1.43765	1.59695	-0.238241	-0.211945	-1.07753	-1.07753	-1.07753	-1.07753	0.465458	1.17348
Col9a1	0.69565	0.134924	0.796698	1.34503	0.618371	0.724463	-1.46424	-1.46424	0.85595	-0.201486	-1.05567	-0.98546
Col19a1	0.576099	0.79119	-0.150307	1.61708	-0.432411	-0.624651	1.21756	0.178558	0.31758	-0.287881	-1.58833	-1.61449
Gm5415	0.0305649	-0.294749	0.620744	2.08864	0.677865	0.573271	-1.51626	-1.51626	0.274252	0.209327	-0.552523	-0.594875
Zap70	-0.792912	-0.787194	1.40722	2.08968	0.569004	0.81682	-0.806537	-0.791272	-0.731858	-0.751031	-0.190691	-0.0312312
Nms	0.431871	0.730003	1.31824	2.05739	-0.836131	-0.836131	-0.836131	-0.836131	-0.836131	-0.836131	0.254491	0.224792
Gm3646	0.122416	0.236552	0.940679	1.59306	1.12752	0.752639	-1.18999	-1.18999	-1.18999	-1.18999	-0.0521307	0.0392164
Uxs1	0.65615	-0.507078	1.29035	2.03293	0.456316	0.354928	-0.322265	-0.263194	-0.605365	-1.56887	-0.857441	-0.666463
Gulp1	0.938149	1.26917	-1.11653	1.6947	-0.353017	-0.214474	0.865736	0.141233	-0.0815165	-0.787904	-1.33373	-1.02182
Col3a1	0.667229	0.532943	1.13981	1.98678	0.529085	0.125035	-0.90785	-1.21066	-0.465958	-0.346768	-1.04728	-1.00236
Hecw2	-0.650016	-0.00574795	0.544927	1.42765	1.24064	1.00414	0.392198	-0.387677	-1.63365	-1.63365	-0.0844633	-0.214359
Sf3b1	-0.0101624	-0.132114	1.16449	1.53651	1.24645	1.13855	-0.992151	-0.992151	-0.992151	-0.992151	-0.524362	-0.450763
Plcl1	1.00492	0.767215	0.0544003	1.45961	-0.24397	-0.82359	-0.928229	-0.838765	-1.60326	-0.755585	1.00353	0.90373
Rpe	0.780271	1.14169	0.94843	1.33975	0.241552	0.403369	-1.2391	-1.2391	-1.2391	-1.2391	0.163766	-0.0624258
Erbb4	-0.630337	-0.895	0.869234	1.40849	1.09299	0.707964	-1.23114	-1.23114	-0.758711	-0.790366	0.918462	0.539546
Spag16	0.452715	0.9899	-0.938109	1.74056	0.683988	1.32831	-0.203702	-0.591698	-0.532389	-0.67689	-1.16346	-1.08923
Vwc2l	-1.37263	-0.539114	-0.322283	1.55066	0.848012	1.07555	-1.25753	-1.50348	0.293008	0.450493	0.452543	0.324771
Epha4	-0.799668	-0.619097	0.912397	2.15882	1.39739	0.458912	-0.760327	-0.697549	-0.679114	-0.778694	-0.376742	-0.216329
Dock10	-0.923343	-0.441697	0.975976	1.49152	1.10924	0.0719449	-1.47655	-1.47655	0.948219	0.316698	-0.26249	-0.332972
Tex44	0.178847	-0.482555	0.784233	2.52756	0.200875	-0.137388	-0.951441	-0.936223	-0.50234	-1.18067	0.00488825	0.494208
Hdac4	-0.0299244	0.115913	1.51574	2.41545	0.22342	-0.157031	-0.680594	-0.680594	-0.680594	-0.680594	-0.680594	-0.680594
Cntnap5b	0.971795	0.0165375	0.470624	1.51803	-0.0438148	-0.756843	-0.930344	-1.68219	1.11384	0.874077	-0.616387	-0.935323
Vps4b	1.17984	-0.153226	0.831392	1.40315	0.855714	0.342827	-1.67682	-1.67682	-0.0801999	-0.09239	-0.483734	-0.449739
Tfcp2l1	-0.340325	-0.559948	1.65223	2.17882	0.430242	0.337873	-0.695523	-0.870036	-0.641686	-1.01201	-0.275761	-0.203877
Avpr1b	1.60826	-0.314745	-0.134114	1.77691	0.621171	0.539079	-1.40508	-1.40508	-0.426875	-0.468405	-0.329637	-0.0614761
Nuak2	0.136916	0.0996079	1.76156	1.83855	-0.12344	-0.0535107	-1.02363	-1.02363	-1.02363	-1.02363	-0.0859935	0.52081
Syt2	-0.399536	-0.433118	1.28511	1.5187	0.963614	-0.153969	-1.54129	-1.54129	-0.377892	-0.249988	0.88553	0.0441294
Zfp281	-0.958425	0.158947	-0.149984	1.47957	1.19602	-0.0467743	1.28526	-0.747811	0.842691	-0.52304	-1.28077	-1.25567
Crb1	-0.159339	-0.0534739	0.53572	1.6327	0.575318	0.523095	-0.696705	-0.690329	-1.61641	-1.61641	0.760292	0.805538
Hmcn1	1.07822	0.448964	1.58678	1.63153	-0.277966	-0.4425	-1.02124	-1.02124	0.0990231	-0.0391144	-1.02124	-1.02124
3110040M04Rik	0.265848	0.11073	1.26991	1.89483	1.13181	0.355912	-0.925028	-0.925028	-0.925028	-0.925028	-0.681983	-0.646945
Tor3a	0.653972	-0.651236	0.368736	1.72021	1.25694	0.806853	-1.49272	-1.49272	-0.221233	-0.394476	-0.215398	-0.338934
Cop1	-0.012456	-0.607568	1.16921	1.55195	0.265619	0.215342	-1.68427	-1.68427	0.457172	-0.461842	-0.0102646	0.801382
Scyl3	-0.704421	1.0883	1.34451	1.59652	-0.35321	-0.625134	-0.0712278	-0.316978	0.499129	0.358263	-1.40788	-1.40788
Pou2f1	0.561144	-0.17206	0.669971	1.10575	0.963044	0.6243	-1.28872	-1.28872	-1.28872	-1.28872	0.560349	0.842373
Pbx1	-0.576029	-0.615742	1.03892	2.09643	1.16775	0.543854	-1.0667	-1.0667	-0.347729	0.0356691	-0.718201	-0.491524
Rgs7	-0.260836	-0.0331514	1.08149	2.22082	-0.297667	-0.170993	0.215919	-0.821133	0.661439	0.0349781	-1.10209	-1.52878
Hnrnpu	-0.417429	-0.371402	0.756535	1.62479	0.749057	0.0414052	-1.77337	-1.77337	0.666673	0.412111	0.0932978	-0.0083116
Itpkb	0.97892	1.25655	0.394867	1.50829	0.935055	-0.0461415	-1.11534	-1.11534	-1.11534	-1.11534	-0.184902	-0.381275
Capn2	1.0994	-0.272779	1.38194	1.77357	0.225651	-0.15874	-1.42405	-1.42405	-0.00127016	-0.297734	-0.581924	-0.320009
Rps6kc1	-0.446323	0.205928	1.42338	1.76882	0.719219	0.118828	0.0653195	-0.507672	-0.233557	-0.0385183	-1.42559	-1.64983
Mthfd1l	-0.891432	-1.20778	1.35313	2.07599	0.786677	0.368814	-0.0594631	-0.454454	-0.933221	-0.865007	-0.0282766	-0.144979
Ccdc170	0.854383	-1.01323	1.60847	1.75799	-0.893985	-1.04938	0.0194715	-0.487521	-0.338124	-1.03474	0.0934579	0.483205
Syne1	-0.0291105	-0.787747	1.05648	2.08338	0.944354	0.704003	-1.0385	-0.951802	-0.860868	-0.879749	-0.175833	-0.0646065
Hivep2	-0.605384	-0.255225	0.938544	1.56653	0.570625	0.00918932	-1.44881	-1.44881	-0.286283	-0.825502	0.472501	1.31264
Ect2l	-0.523512	-0.424646	1.05034	1.70863	0.86809	0.757334	-1.52751	-1.52751	-0.44757	-0.387117	0.422056	0.0314199
Map7	0.0801799	-0.0713896	1.66172	1.88852	0.779178	0.0667731	-0.994547	-0.994547	-0.994547	-0.994547	-0.24093	-0.185859
Ahi1	-1.08926	-0.954995	0.560995	2.23291	0.61972	0.94951	-0.714713	-0.801482	-0.567305	-0.81857	0.283658	0.299527
Arhgap18	-1.29496	-0.875641	0.817985	1.45743	0.985491	0.668071	-0.136967	-0.379536	0.911363	0.372979	-1.36858	-1.15763
Sult3a2	0.703581	0.121833	1.13237	1.68943	-0.895831	-0.895831	-0.895831	-0.895831	-0.895831	-0.895831	1.01556	0.712211
Frk	-0.0648428	0.22648	0.015787	1.3287	1.16585	0.285576	-1.86556	-1.29114	0.702507	-1.30766	0.223619	0.580676
Prep	-0.132622	0.774458	-0.611913	2.51021	-0.169665	-0.191039	0.508007	-0.775769	0.593046	-0.3649	-1.00815	-1.13166
Ascc3	-0.995539	-1.1441	1.06955	2.30255	0.909345	0.358422	-0.52475	-0.448751	-0.0363285	-0.266883	-0.58811	-0.635399
Vgll2	0.260675	0.285289	0.588286	1.89148	0.300546	0.485586	-1.74806	-1.74806	0.460232	-0.467719	-0.0792259	-0.229032
Nus1	0.602829	0.58381	-0.128406	2.04414	0.453898	-0.110559	-1.14464	-1.14464	-1.14464	-1.14464	0.570691	0.562157
Mcm9	0.0881825	0.0696397	0.981787	1.83187	0.572406	0.0283579	-0.441217	-1.03485	0.977828	-0.27199	-1.1582	-1.64381
Ccdc138	1.05062	-0.984484	0.6051	2.02884	-0.447504	-0.704555	-0.729475	-1.10601	0.736682	0.810316	-0.623007	-0.636519
Cabcoco1	1.0571	0.127172	0.813216	1.64047	0.478699	0.610799	-1.76884	-1.23561	-0.2248	-1.04813	-0.171368	-0.278704
Casp14	1.14331	0.364824	0.914476	1.61997	0.67421	0.0152126	-1.18372	-1.18372	-1.18372	-1.18372	-0.139185	0.14208
1500009L16Rik	-0.677472	-0.596244	0.854545	1.08034	-0.240927	-0.776253	-1.51872	-1.51872	0.967339	0.558422	1.04056	0.827136
Cry1	-1.72252	-1.08142	0.19981	1.88896	0.642536	0.444123	0.25617	0.721429	-0.767191	-1.12325	0.447276	0.0940704
Pah	0.890325	-0.110477	0.618315	1.22411	1.21426	0.733178	-1.24008	-1.24008	-1.24008	-1.24008	0.00170001	0.388893
Pmch	0.654683	0.0539394	1.25271	1.31916	1.19127	0.690163	-1.13508	-1.13508	-1.13508	-1.13508	-0.402387	-0.219214
Ano4	1.01734	0.0299971	0.809008	1.20508	0.106997	0.653631	-1.75563	-1.75563	0.564552	0.352542	-0.783314	-0.444576
Usp44	-0.0657571	0.330373	0.206053	1.97595	1.03751	0.472615	-1.47747	-1.47747	0.356256	0.142656	-0.731289	-0.769415
Ndufa12	1.22574	0.147043	0.994136	1.28894	1.04217	0.533266	-1.40522	-1.40522	-0.649083	-0.74601	-0.477109	-0.548647
Btg1	-1.10578	-1.22681	1.00394	2.2074	0.859645	0.509788	-0.46371	-0.963909	-0.285424	-0.291417	-0.283976	0.0402474
Mgat4c	-0.955228	-0.954286	1.44159	2.02685	0.836941	0.531723	-0.753851	-0.790335	-0.536586	-0.717827	-0.10289	-0.0260966
Gm4340	-0.0157399	0.364975	1.53758	1.84799	0.174024	0.259676	-1.11163	-1.11163	-1.11163	-1.11163	0.202553	0.0754518
Ccdc59	1.38401	1.12099	0.875985	1.53715	-0.877858	-0.877858	-0.877858	-0.877858	-0.877858	-0.877858	0.0938317	0.255189
Acss3	0.320284	0.192107	0.630493	1.6265	0.855158	1.43222	-1.30362	-1.30362	-0.767048	-0.74814	-0.627654	-0.306684
Ptprq	-1.49013	-0.599419	0.386436	1.67474	0.733552	0.650513	-0.405292	-1.27753	0.934573	0.845368	-0.545978	-0.90683
Ppp1r12a	-1.05827	-0.139936	0.420755	1.84373	1.30168	0.967372	-0.497168	-1.50086	0.237263	-0.435679	-0.209221	-0.929671
Syt1	0.234575	-0.119932	0.868862	1.32853	1.23332	0.396916	-1.66328	-1.92676	-0.214295	0.0803715	0.188293	-0.40661
Krr1	-0.657345	-0.956757	0.255315	1.9356	-0.285353	-0.0123264	-0.417488	-1.1961	1.82664	0.418818	-0.118417	-0.792585
Ptprr	0.297642	0.239834	1.34628	2.3372	-0.00292398	-0.00625181	-1.12376	-1.12376	-0.660502	-0.597661	-0.425345	-0.280741
Cnot2	-1.18658	-0.938403	0.0101708	1.83795	0.723593	0.406149	1.77637	-0.34601	-0.455813	-0.727615	-0.432638	-0.667177
Lrig3	-1.04551	-1.22239	0.296724	1.98051	0.927722	0.326857	0.536421	0.142913	-1.0401	-1.38425	0.320771	0.160327
Sdr9c7	-0.384518	0.792641	0.937592	1.47307	1.15951	0.461421	-0.723295	-0.764013	-0.204287	0.223886	-1.45184	-1.52016
Cobl	-0.756619	-0.749152	0.974361	1.49055	0.267819	0.0345791	-0.659306	-0.694627	-1.17058	-1.17058	1.2584	1.17515
C1d	-0.721047	-0.773045	0.982854	1.11369	-0.409691	-0.240484	-1.55911	-1.55911	0.732381	0.589315	0.970108	0.874131
Slc1a4	-0.987105	-0.26336	0.490108	2.18225	-0.583608	0.38613	-0.916582	-0.552252	1.49072	0.203658	-0.679345	-0.770607
Ccdc85a	-0.850698	-0.672519	0.331376	1.08009	0.973998	0.807837	-1.73343	-1.73343	0.76072	0.339076	0.33779	0.359189
Ppp4r3b	1.17774	0.340031	0.587654	1.44046	1.04295	0.801356	-0.891834	-1.19008	-1.0032	-1.23753	-0.415986	-0.651567
Psme4	-0.646973	-0.715318	0.875289	1.72349	1.33097	0.283103	-1.37471	-1.37471	-0.34349	-0.526173	0.307683	0.46084
Gabrp	-0.053574	-0.380331	1.13517	1.49561	0.409942	0.601263	0.584231	0.505347	-1.69123	-1.69123	-0.632841	-0.282348
Kcnip1	-0.375538	0.272996	-1.21618	1.74619	1.00021	0.110959	0.0515862	-1.87539	1.04746	0.236816	-0.310736	-0.688371
Fabp6	0.550633	0.0371731	0.548018	2.41171	-0.797304	-0.797304	-0.797304	-0.797304	-0.797304	-0.797304	0.631729	0.604558
Hs3st3b1	0.449207	-0.105743	0.821265	1.69753	0.519478	1.23355	-1.40234	-1.40234	-0.755044	-0.941451	0.0902541	-0.20437
Stx8	0.12373	0.267746	1.62714	2.0047	-0.21808	-0.268599	0.34334	-0.0965402	-1.26723	-1.26723	-0.561374	-0.687603
Cyb5d2	0.528568	0.331856	1.79264	2.01144	-0.743292	-0.743292	-0.743292	-0.743292	-0.743292	-0.743292	-0.0152507	-0.189499
Ssh2	0.688862	0.623642	1.0822	1.905	0.736297	0.017665	-1.05348	-1.05348	-1.05348	-1.05348	-0.387678	-0.452071
Kpnb1	0.800051	-0.0144589	0.556532	1.41507	-0.161903	-0.504822	-1.64637	-1.64637	-0.310318	-0.444362	0.716931	1.24003
Ormdl3	0.984124	0.159846	0.69187	1.028	0.905764	0.770094	-1.30483	-1.30483	-1.30483	-1.30483	0.428586	0.251028
Gsdma2	0.985074	-1.63006	0.591291	1.56577	0.967868	0.62697	-0.0380378	-0.856226	-0.292833	-1.52841	-0.260751	-0.130655
Gm11554	0.975154	1.08163	0.883672	1.28881	0.671898	0.121742	-1.21987	-1.21987	-1.21987	-1.21987	-0.00716771	-0.136234
Efcab3	-0.00167311	0.322315	1.20496	1.71884	-0.223538	-0.313352	-1.75671	-1.74522	0.0301521	0.199024	0.351611	0.213592
Cyb561	-1.05059	-0.605057	0.774259	1.7876	1.2115	1.04804	-0.949217	-1.02803	-0.639052	-0.86148	0.233423	0.0786044
Limd2	0.431938	-0.204749	1.24307	1.41874	-0.0607986	-0.127783	-1.15224	-1.15224	-1.15224	-1.15224	1.1296	0.778962
Slc39a11	0.283272	0.0926538	1.80226	2.07147	-0.127622	0.0668791	-0.885766	-0.885766	-0.885766	-0.885766	-0.369926	-0.275919
Eif4a3	0.658136	0.226994	1.33325	2.04119	0.422704	0.370609	-0.842148	-0.842148	-0.842148	-0.842148	-0.842148	-0.842148
Atad2b	0.100164	-0.755221	1.2627	1.30951	0.825246	0.74785	-0.80836	-0.711907	-1.44723	-1.44723	0.245977	0.6785
Nrcam	-0.465456	-0.723559	0.746884	1.58087	1.39312	0.561155	-1.24003	-1.24003	-0.778106	-0.855234	0.594876	0.425498
Coch	-0.369017	-0.625313	1.58738	1.91528	0.650741	0.230797	-0.962039	-0.962039	-0.962039	-0.962039	0.250605	0.207683
Egln3	0.0182015	-1.06765	0.702328	1.46697	0.723128	0.694372	-1.59049	-1.7473	0.659305	-0.211157	-0.0304995	0.382789
Psma6	0.677438	-0.270487	0.967135	1.7372	1.12331	0.529289	-1.10447	-1.10447	-1.10447	-1.10447	-0.302301	-0.0437005
Insm2	-0.374877	-0.679611	1.03651	1.6929	1.11101	0.981404	-1.3851	-1.3851	-0.171972	-0.589833	-0.0236692	-0.211665
Mipol1	1.122	1.19934	0.81915	1.53992	-0.314215	-0.389501	-1.10758	-1.10758	-1.10758	-1.10758	0.219533	0.234079
Sec23a	-0.762074	-0.772069	1.06086	1.5559	0.68075	0.513904	-1.01864	-1.34634	-0.626174	-0.955181	0.804689	0.864372
Wdr20rt	0.615232	1.44932	-0.93118	1.62443	0.370734	-1.2967	0.183388	-1.13691	-0.326942	-1.13587	-0.0963787	0.680882
Mdga2	-1.39768	-1.05281	-0.126888	1.48072	1.06974	1.01111	-0.0545852	-1.05702	1.33084	-0.0525189	-0.631657	-0.519246
Syt16	-1.58546	-0.022968	-0.660337	2.07153	0.237601	-0.434714	-1.04294	0.255604	-0.717382	-0.0217993	0.95704	0.963827
Fut8	0.164556	-0.827431	1.16108	2.0072	0.26369	0.0617248	-0.992976	-0.983735	-1.04829	-1.01551	0.498997	0.710703
Ccdc177	-0.0767182	0.317832	0.696354	1.86498	0.682857	-0.40107	-1.4514	-1.70211	-0.185353	-0.677987	0.0360587	0.896563
Slc10a1	0.505475	0.371283	1.88898	2.03809	-0.600478	-0.600478	-0.600478	-0.600478	-0.600478	-0.600478	-0.600478	-0.600478
Vash1	0.653642	0.354547	1.61776	1.85422	0.160494	-0.060994	-1.02213	-1.02213	-1.02213	-1.02213	-0.422676	-0.0684854
Nrxn3	-0.876518	-0.883795	0.516137	1.75275	1.36791	1.48154	-0.420091	-0.647022	-0.788884	-0.610687	-0.616406	-0.274939
Ttc8	0.25469	-0.167383	0.749185	1.17768	0.817011	0.253787	-1.25438	-1.25438	-1.25438	-1.25438	1.14752	0.785043
Atxn3	0.103769	-0.662534	1.64447	2.01748	0.308068	0.109027	-1.2829	-1.2829	-0.249829	-0.455249	-0.320292	0.0708941
Dlk1	-1.47245	-1.61497	-0.0973505	1.89756	0.118616	0.673499	-0.377313	-0.157912	0.316575	-0.721201	1.12289	0.31205
Wdr20	-1.67458	0.814306	-0.0669686	1.94151	0.0997204	0.315287	1.01491	-0.335272	0.108424	-0.00441315	-0.953664	-1.25925
Wdr37	0.0498637	-0.598534	0.397143	1.48603	1.09458	0.644416	-1.79099	-1.79099	0.201393	-0.209155	0.374405	0.141822
Dip2c	0.494947	-0.222881	1.37085	1.92047	0.762308	0.27758	-1.3154	-1.3154	-0.520904	-0.653387	-0.364649	-0.433546
Arid4b	-0.239602	-0.847244	0.615928	1.73651	0.749229	0.736978	-1.36456	-1.36456	-0.569527	-0.83791	0.602418	0.782336
Gli3	0.792688	0.259178	0.335078	1.13997	0.787339	0.615711	-1.65558	-1.65558	-0.821429	-0.989676	0.749139	0.443154
Aoah	-0.0763456	-0.229199	0.413284	1.7711	-0.78227	-0.78227	-0.78227	-0.78227	-0.78227	-0.78227	1.42834	1.38643
Eci2	-0.309755	-0.578691	0.842282	2.11689	-0.353542	-0.0735358	-0.556802	0.510533	1.25931	-0.962052	-1.37814	-0.516488
Cdyl	-0.0590872	-0.843547	0.0310831	1.86775	0.638793	-0.0532541	-1.28482	-1.72301	0.249558	-0.443446	0.498583	1.1214
F13a1	-1.45198	-0.728029	1.2182	1.87596	1.15655	0.721022	-0.525776	-0.811054	-0.25057	-0.387188	-0.509166	-0.307961
Snrnp48	0.0131835	0.0418415	1.68617	2.37782	-0.639823	-0.639823	-0.639823	-0.639823	-0.639823	-0.639823	-0.192252	-0.0878196
Hivep1	-1.04198	-1.39853	0.911717	2.0971	-0.179353	-0.310658	-0.00244061	0.0348043	0.874241	0.674316	-0.873941	-0.785278
Jarid2	-0.579663	-0.912186	1.27781	1.50072	0.895378	0.281154	-1.17706	-0.938036	-0.768935	-1.0329	0.519478	0.934243
Atxn1	-0.0539271	-0.512111	0.66949	1.32064	0.974107	1.12975	-1.18206	-1.18206	-1.18206	-1.18206	0.663099	0.537177
Zfp169	0.510493	-0.133858	1.51253	2.35006	-0.633197	-0.436803	-0.330592	-0.80885	-0.100877	-0.192271	-0.884854	-0.851788
Tifab	0.0833898	-0.075085	1.12979	2.12044	0.60309	-0.248764	-1.44876	-1.44876	0.187476	0.133961	-0.498988	-0.537779
Gm5141	0.216426	0.0574654	0.601778	1.875	1.38311	0.524469	-1.09798	-1.09798	-1.09798	-1.09798	-0.0183644	-0.247974
Zfp729a	1.14771	0.674804	0.309043	1.53543	0.404713	1.0754	-0.200512	-1.30299	-1.15548	-1.27414	-0.505354	-0.708631
BC048507	-0.259454	-0.247346	1.46322	1.60231	0.55325	0.0517311	-1.42311	-1.42824	-0.389495	-0.801442	-0.112644	0.991218
Tent4a	0.765559	0.705525	0.176036	1.41373	1.24107	0.455473	-1.2226	-1.2226	-1.2226	-1.2226	-0.208196	0.341214
Cetn3	-1.0479	-0.331415	0.904995	1.59937	-0.0453806	-0.553183	-0.199812	-1.12953	1.25896	1.29328	-0.832921	-0.916475
Zcchc9	-0.17789	-0.308962	1.52516	2.39009	-0.460079	-0.249096	-1.03385	-1.03385	-0.271587	-0.561669	-0.00160633	0.183335
Homer1	0.384485	-0.0171956	0.723399	2.23868	0.472789	0.143104	-1.41809	-1.41809	-0.297042	0.430965	-0.668652	-0.574348
Ankdd1b	-0.0715907	-0.110173	1.60235	1.94349	0.419707	0.813939	-0.917879	-0.917879	-0.917879	-0.917879	-0.47904	-0.447158
Cartpt	0.372034	0.543716	0.204024	1.62954	0.852964	0.531733	-1.45629	-1.45629	-0.909628	-1.10437	0.0385725	0.754003
Pde4d	-1.98716	0.055372	0.181931	1.9624	0.0839782	0.177327	1.13081	0.3786	0.163934	-0.732619	-0.443366	-0.971215
Gpbp1	-0.134776	-0.669807	1.2859	1.83448	1.03356	0.0698033	-1.3145	-1.3145	-0.762261	-0.527847	0.230436	0.269502
[truncated: 9,969 more rows]
