# Supplementary material for: The Cumulative Formation of R-loop Interacts with Histone Modifications to Shape Cell Reprogramming
Source: Int J Mol Sci. 2022 Jan 29;23(3):1567. doi: 10.3390/ijms23031567 (PMC8835745; doi:10.3390/ijms23031567)
Supplement: Supplementary file 1 [file ijms-23-01567-s001.zip › Table S2.xlsx]

## Sheet: Table S2
Table S2. The R-loop signals at 3 kb region flanking of TSS and TTS during reprogramming progress.
	D0	D1	D3	D5	D7	iPSC
1	0.288678	0.299373	0.18898	0.188705	0.196145	0.151445
2	0.337915	0.358947	0.216121	0.217343	0.223187	0.167186
3	0.359758	0.382275	0.22665	0.238476	0.244302	0.171483
4	0.330862	0.344452	0.210138	0.220492	0.22791	0.163628
5	0.326469	0.318358	0.19588	0.195768	0.204288	0.163132
6	0.296709	0.291392	0.182355	0.184029	0.19003	0.158531
7	0.319339	0.316438	0.194996	0.198578	0.206407	0.165469
8	0.329519	0.326322	0.196557	0.208142	0.211069	0.161826
9	0.300168	0.301218	0.187634	0.198326	0.201909	0.155167
10	0.334657	0.324172	0.201094	0.208559	0.217331	0.161762
11	0.331026	0.330235	0.198482	0.213001	0.215653	0.16051
12	0.306262	0.318882	0.192775	0.201442	0.210158	0.159138
13	0.272818	0.281017	0.176091	0.18317	0.193452	0.147179
14	0.221614	0.238743	0.153737	0.174	0.171925	0.129603
15	0.235718	0.265285	0.166007	0.199115	0.189114	0.134686
16	0.245168	0.272167	0.168706	0.20344	0.194164	0.135285
17	0.250309	0.266543	0.165722	0.194675	0.192325	0.129279
18	0.277595	0.299098	0.176587	0.211544	0.211177	0.127437
19	0.30352	0.328922	0.186485	0.227106	0.230867	0.124747
20	0.24896	0.267149	0.156826	0.184779	0.201021	0.106449
21	0.168577	0.190767	0.117726	0.140348	0.154592	0.0852185
22	0.160363	0.184827	0.11775	0.14308	0.146034	0.0883929
23	0.166059	0.190623	0.123645	0.149177	0.147084	0.0957725
24	0.168522	0.198124	0.130309	0.156429	0.150564	0.101863
25	0.170583	0.199394	0.130571	0.157804	0.146469	0.104704
26	0.170723	0.199072	0.131329	0.15711	0.144576	0.105709
27	0.171753	0.199532	0.130859	0.158012	0.141454	0.10508
28	0.173329	0.202001	0.132051	0.159172	0.140774	0.106586
29	0.172432	0.201072	0.132501	0.159857	0.139393	0.106097
30	0.172366	0.201135	0.134079	0.157751	0.138285	0.109792
31	0.172869	0.203739	0.134382	0.15893	0.136939	0.109415
32	0.182493	0.216174	0.138069	0.163671	0.139312	0.110187
33	0.184936	0.218492	0.138887	0.165945	0.139241	0.111835
34	0.186979	0.220673	0.140125	0.167287	0.139997	0.111886
35	0.186701	0.220532	0.139841	0.167846	0.139658	0.111703
36	0.191522	0.228596	0.142961	0.174621	0.142205	0.113026
37	0.189388	0.226664	0.141566	0.175313	0.140882	0.111987
38	0.199179	0.237202	0.145619	0.178122	0.144098	0.113293
39	0.203827	0.244397	0.14981	0.183583	0.146569	0.117342
40	0.20447	0.245105	0.150526	0.183791	0.147156	0.11713
41	0.197774	0.237485	0.147549	0.1809	0.146445	0.115141
42	0.198303	0.238366	0.146851	0.18059	0.145258	0.113986
43	0.198725	0.23977	0.14761	0.181517	0.146033	0.112804
44	0.199812	0.240977	0.148785	0.18078	0.146867	0.113497
45	0.195829	0.235618	0.146819	0.17583	0.144447	0.11301
46	0.196228	0.234235	0.146956	0.173013	0.144316	0.113996
47	0.19486	0.232846	0.146155	0.173388	0.14391	0.111957
48	0.197671	0.234596	0.14714	0.176049	0.144828	0.112359
49	0.197296	0.23376	0.14654	0.175167	0.144108	0.112111
50	0.207966	0.248237	0.153113	0.182524	0.150198	0.114835
51	0.209661	0.247964	0.154107	0.186225	0.153375	0.115124
52	0.211202	0.249364	0.155899	0.187533	0.154406	0.116398
53	0.21156	0.24958	0.154891	0.187066	0.153795	0.114535
54	0.212066	0.251638	0.156091	0.189169	0.154744	0.115453
55	0.210022	0.24752	0.154325	0.187898	0.153009	0.113292
56	0.204847	0.240352	0.152068	0.186835	0.151054	0.111808
57	0.202607	0.237069	0.150084	0.184206	0.149968	0.110232
58	0.19102	0.222647	0.142432	0.178031	0.143636	0.105457
59	0.186756	0.217172	0.140577	0.175224	0.141509	0.104732
60	0.184385	0.213451	0.138783	0.173048	0.139783	0.104327
61	0.185331	0.213879	0.138747	0.17357	0.139731	0.102897
62	0.180725	0.207162	0.136137	0.169876	0.137577	0.100709
63	0.180732	0.207737	0.136568	0.170154	0.138543	0.101539
64	0.180229	0.208914	0.135672	0.17118	0.139221	0.0993765
65	0.180112	0.209604	0.135683	0.170967	0.139647	0.0984893
66	0.182328	0.211352	0.13649	0.17305	0.140339	0.0989294
67	0.18163	0.210495	0.136677	0.171913	0.14099	0.0990478
68	0.180126	0.210375	0.135668	0.171326	0.139468	0.0974564
69	0.190497	0.223663	0.141934	0.184206	0.150392	0.100347
70	0.185946	0.219905	0.140487	0.183382	0.150491	0.0997065
71	0.186609	0.221332	0.140264	0.182182	0.150356	0.0983818
72	0.195275	0.229642	0.143047	0.185247	0.153578	0.0987711
73	0.199206	0.233783	0.145148	0.189321	0.157845	0.0987373
74	0.202921	0.235772	0.146374	0.190734	0.158819	0.0992305
75	0.208298	0.239592	0.147913	0.194488	0.162063	0.0983724
76	0.204517	0.234	0.143362	0.190924	0.159748	0.0952777
77	0.209328	0.240081	0.146038	0.195669	0.164746	0.0962558
78	0.210419	0.238036	0.145544	0.195619	0.165355	0.0951997
79	0.203015	0.229802	0.140121	0.189477	0.161031	0.0909921
80	0.197933	0.22404	0.135288	0.183983	0.155606	0.0864711
81	0.200248	0.226974	0.139097	0.186737	0.159418	0.0912938
82	0.187773	0.212732	0.133688	0.170825	0.146963	0.0972299
83	0.181952	0.214281	0.131935	0.161527	0.13573	0.103361
84	0.152106	0.174909	0.116758	0.135739	0.117239	0.0971302
85	0.137341	0.154617	0.108815	0.124182	0.109119	0.0923124
86	0.163687	0.18942	0.125749	0.156303	0.131061	0.101117
87	0.1537	0.174252	0.121717	0.151871	0.127592	0.0983665
88	0.137412	0.154727	0.112112	0.134533	0.115156	0.0922709
89	0.178589	0.214475	0.137357	0.179569	0.14748	0.101517
90	0.195241	0.234841	0.148051	0.19464	0.16258	0.106154
91	0.187691	0.225496	0.145292	0.187358	0.161051	0.105438
92	0.200194	0.238165	0.152608	0.201332	0.173642	0.107895
93	0.188588	0.224997	0.147647	0.191814	0.168486	0.106092
94	0.242979	0.29077	0.174071	0.230472	0.19866	0.120254
95	0.274448	0.328186	0.189494	0.260107	0.218473	0.127941
96	0.210528	0.24921	0.155848	0.20402	0.172612	0.113268
97	0.168522	0.195173	0.130799	0.165568	0.137613	0.104539
98	0.158443	0.18178	0.124709	0.158468	0.132097	0.103995
99	0.174185	0.202305	0.135268	0.167575	0.145008	0.10777
100	0.192829	0.225033	0.145923	0.19088	0.161191	0.110991
101	0.167827	0.191436	0.133076	0.171439	0.145228	0.105454
