# Supplementary material for: The Cumulative Formation of R-loop Interacts with Histone Modifications to Shape Cell Reprogramming
Source: Int J Mol Sci. 2022 Jan 29;23(3):1567. doi: 10.3390/ijms23031567 (PMC8835745; doi:10.3390/ijms23031567)
Supplement: Supplementary file 1 [file ijms-23-01567-s001.zip › Table S3.xlsx]

## Sheet: Table S3
Table S3. The related information of up-regulated genes with higher R-loop signals (n = 1271) and down-regulated genes with lower R-loop signals (n = 159).
Gene	Rloop_Log2FC	Exp_Log2FC	Class
1110032F04Rik	8.28454	4.56884	Up_regulated
1700008O03Rik	7.71226	3.78907	Up_regulated
1700019D03Rik	8.05816	2.60131	Up_regulated
1700029P11Rik	7.69993	8.52558	Up_regulated
1810009A15Rik	7.07476	1.3681	Up_regulated
2300002M23Rik	7.96515	6.62584	Up_regulated
2410141K09Rik	2.7974	13.3238	Up_regulated
2610044O15Rik8	7.62063	1.30398	Up_regulated
3110082I17Rik	7.69993	1.41874	Up_regulated
4833420G17Rik	8.75819	1.53749	Up_regulated
4930447C04Rik	9.62348	3.49807	Up_regulated
4930452B06Rik	7.45505	1.19078	Up_regulated
5430403G16Rik	10.3358	2.49235	Up_regulated
5730507C01Rik	2.74815	3.23843	Up_regulated
8030462N17Rik	8.74754	1.75573	Up_regulated
A2m	8.42276	7.61357	Up_regulated
A430005L14Rik	7.4932	1.14155	Up_regulated
A4galt	8.98694	4.35399	Up_regulated
Aard	8.17773	3.68448	Up_regulated
Aars2	7.52789	1.82087	Up_regulated
Abcb1a	7.74861	3.85003	Up_regulated
Acacb	8.0066	1.76991	Up_regulated
Acer2	8.78802	5.20979	Up_regulated
Acoxl	7.19471	3.71085	Up_regulated
Acp7	7.30166	3.21198	Up_regulated
Acsbg2	7.52853	7.74296	Up_regulated
Acsm4	7.59119	6.56374	Up_regulated
Actl6a	8.95001	2.57699	Up_regulated
Actr3b	7.2177	2.22924	Up_regulated
Adal	8.76169	1.81739	Up_regulated
Adam11	7.62184	1.17478	Up_regulated
Adam1a	7.42946	1.52747	Up_regulated
Adamts15	9.92149	1.22164	Up_regulated
Adgrg1	7.50298	4.69413	Up_regulated
Adi1	7.38952	1.10729	Up_regulated
Adipor2	7.5298	1.14487	Up_regulated
Aff1	8.02974	1.47568	Up_regulated
Agbl5	7.55615	1.20938	Up_regulated
Agtr2	8.07721	2.9577	Up_regulated
Ahctf1	9.04762	1.17184	Up_regulated
Ahcy	8.96176	1.74494	Up_regulated
Aicda	7.88462	5.1476	Up_regulated
Ak7	7.78897	5.79217	Up_regulated
Akap1	8.94401	1.79367	Up_regulated
Akap12	7.68919	1.17776	Up_regulated
Akap8	8.91349	1.77183	Up_regulated
Alg6	1.29586	1.36313	Up_regulated
Alms1	1.31257	2.41616	Up_regulated
Alox12e	8.9179	7.28391	Up_regulated
Anapc15	7.94194	1.71883	Up_regulated
Ankrd31	10.0581	4.02242	Up_regulated
Ankrd6	8.0112	2.81584	Up_regulated
Ano9	7.94726	11.4545	Up_regulated
Anp32e	7.99693	1.43577	Up_regulated
Aoc3	7.81583	2.68032	Up_regulated
Ap3b2	8.85143	10.2307	Up_regulated
Apba2	9.38377	3.71154	Up_regulated
Apela	7.35271	8.53636	Up_regulated
Apob	9.21707	5.1241	Up_regulated
Aqp3	8.71963	2.78216	Up_regulated
Aqp6	7.71894	5.28748	Up_regulated
Arc	8.46689	3.80767	Up_regulated
Arhgap11a	7.37334	1.11075	Up_regulated
Arhgap19	7.51961	2.913	Up_regulated
Arhgap32	1.31563	1.9179	Up_regulated
Arhgef3	1.56051	1.27498	Up_regulated
Arid1a	8.07881	1.1558	Up_regulated
Arl14epl	9.35712	5.02322	Up_regulated
Arl15	8.80588	1.10344	Up_regulated
Arl6ip6	7.96373	1.53654	Up_regulated
Ascl4	7.58389	5.5989	Up_regulated
Asf1a	7.94472	1.59381	Up_regulated
Aspg	7.57285	3.51958	Up_regulated
Asrgl1	1.47695	1.31293	Up_regulated
Asxl1	8.45225	1.47965	Up_regulated
Asxl2	9.40939	1.56418	Up_regulated
Atad2	7.71282	1.43753	Up_regulated
Atf7ip2	7.6003	4.85963	Up_regulated
Atg13	7.48213	1.70407	Up_regulated
Atp1b1	7.63897	2.09946	Up_regulated
Atp2a3	9.2608	3.56168	Up_regulated
Atp8b3	8.48951	2.44781	Up_regulated
Auts2	1.20235	2.43739	Up_regulated
B4galnt2	8.00799	2.52767	Up_regulated
B4galnt3	7.04936	7.13474	Up_regulated
B4galt6	9.73226	1.98342	Up_regulated
B9d1	7.96548	1.01956	Up_regulated
Bag4	7.67608	1.64178	Up_regulated
Bard1	10.4337	2.8489	Up_regulated
Bbs4	8.90583	1.29838	Up_regulated
Bbs9	10.6107	1.74007	Up_regulated
BC005561	8.70396	1.86132	Up_regulated
BC024063	9.08764	2.30815	Up_regulated
BC051019	7.18744	2.94217	Up_regulated
BC052040	8.23133	1.7852	Up_regulated
BC055324	7.41445	2.57401	Up_regulated
Bcas1	8.48349	3.39856	Up_regulated
Bcat1	7.44432	2.02774	Up_regulated
Bckdhb	1.30983	1.34427	Up_regulated
Bcl2l14	10.1232	4.54238	Up_regulated
Bclaf1	7.9063	1.36251	Up_regulated
Bdh1	7.44696	2.96038	Up_regulated
Bend3	8.41083	1.62026	Up_regulated
Bend4	1.1839	1.75365	Up_regulated
Bhmt	8.81842	8.02089	Up_regulated
Bicdl1	9.71708	2.44289	Up_regulated
Bicral	9.73595	2.6009	Up_regulated
Blm	9.10836	2.85679	Up_regulated
Blnk	8.30325	2.17032	Up_regulated
Bmp7	7.31941	3.34038	Up_regulated
Bnc2	1.23699	1.50071	Up_regulated
Bnip3	7.3311	1.50134	Up_regulated
Bptf	9.23517	1.34323	Up_regulated
Brca1	9.81238	2.86442	Up_regulated
Brca2	9.65393	2.90863	Up_regulated
Brwd1	9.23356	1.69232	Up_regulated
Bsn	8.81811	3.05278	Up_regulated
Bspry	7.5042	3.93136	Up_regulated
Btbd2	8.42348	1.65459	Up_regulated
Btla	9.1322	6.33616	Up_regulated
C2cd5	9.18917	2.99136	Up_regulated
C77080	7.71177	2.76617	Up_regulated
Cabp1	8.25664	3.72115	Up_regulated
Cabp7	7.49969	9.0362	Up_regulated
Cacng5	9.2039	5.29697	Up_regulated
Calcr	8.52452	5.70965	Up_regulated
Camk2b	7.77616	6.35147	Up_regulated
Camkmt	1.41984	1.89019	Up_regulated
Caps2	7.38247	5.85532	Up_regulated
Capsl	10.1679	8.38593	Up_regulated
Card11	9.03524	5.8125	Up_regulated
Casp9	7.41031	1.30097	Up_regulated
Casr	8.52225	4.83614	Up_regulated
Cavin4	9.57253	1.5164	Up_regulated
Cbfa2t2	7.62717	1.21689	Up_regulated
Cbx7	7.45899	5.51985	Up_regulated
Ccdc114	7.77669	2.40229	Up_regulated
Ccdc18	8.03689	1.96453	Up_regulated
Ccdc30	1.02847	3.01694	Up_regulated
Ccdc36	7.63543	7.81826	Up_regulated
Ccdc39	7.07989	1.30439	Up_regulated
Ccdc40	7.66285	3.51973	Up_regulated
Ccdc58	7.99347	1.25331	Up_regulated
Ccdc73	8.75191	2.72218	Up_regulated
Ccdc77	9.02875	1.76981	Up_regulated
Ccdc85c	7.55119	2.95411	Up_regulated
Ccl8	9.08366	5.64794	Up_regulated
Ccnb1	7.78674	2.31932	Up_regulated
Ccnb2	9.48115	2.07125	Up_regulated
Ccnt2	8.02968	1.92125	Up_regulated
Ccr4	8.98873	8.46693	Up_regulated
Cd2bp2	7.84644	1.07479	Up_regulated
Cd37	7.60441	3.1511	Up_regulated
Cd38	7.24022	1.0738	Up_regulated
Cd6	7.71282	4.51373	Up_regulated
Cd79b	9.34428	7.24655	Up_regulated
Cdan1	9.43763	1.46115	Up_regulated
Cdc23	8.81693	1.08094	Up_regulated
Cdc37l1	7.04218	1.1662	Up_regulated
Cdc5l	8.25861	2.69908	Up_regulated
Cdca3	7.45368	2.53499	Up_regulated
Cdca7	10.1219	3.11296	Up_regulated
Cdk5r1	8.02695	2.36094	Up_regulated
Cdk5rap1	7.53107	1.55505	Up_regulated
Cdk5rap2	9.37838	1.22476	Up_regulated
Cdkn2aipnl	9.29726	1.70481	Up_regulated
Cdx2	8.21211	8.68564	Up_regulated
Cdyl2	8.2322	2.62933	Up_regulated
Ceacam20	8.18222	5.14008	Up_regulated
Celf1	9.18313	1.21269	Up_regulated
Cenpk	7.70274	1.02444	Up_regulated
Cenpu	7.5126	2.67857	Up_regulated
Cenpx	7.5378	1.04036	Up_regulated
Cep192	8.44619	2.02851	Up_regulated
Cep295	8.87233	1.51608	Up_regulated
Cep55	7.82754	2.56965	Up_regulated
Cep70	8.68962	2.16843	Up_regulated
Cep85	7.90241	2.06435	Up_regulated
Cfap206	7.27699	2.75469	Up_regulated
Cfc1	7.27848	5.74151	Up_regulated
Chaf1b	6.9879	2.41826	Up_regulated
Chchd10	7.79789	5.73846	Up_regulated
Chd1l	7.18823	1.9106	Up_regulated
Chd7	9.03562	1.59608	Up_regulated
Chka	9.30836	1.38905	Up_regulated
Chmp4c	7.94386	1.59751	Up_regulated
Chn1	9.71142	1.70954	Up_regulated
Chrm4	10.0823	2.17053	Up_regulated
Chrna7	8.30418	2.93781	Up_regulated
Chrna9	8.74274	7.55426	Up_regulated
Chst10	7.92088	1.71608	Up_regulated
Cip2a	7.4483	1.77551	Up_regulated
Ckb	8.97313	1.44743	Up_regulated
Clca4a	7.46635	1.94177	Up_regulated
Clcn3	10.1239	2.35249	Up_regulated
Cldn15	7.84096	2.46774	Up_regulated
Cldn5	1.17784	4.59365	Up_regulated
Cldn7	7.94	5.38331	Up_regulated
Clmn	8.16933	2.93472	Up_regulated
Clnk	10.3501	2.92627	Up_regulated
Clstn3	1.12527	7.37258	Up_regulated
Clvs2	7.34342	6.97649	Up_regulated
Clybl	7.2208	1.68014	Up_regulated
Cmss1	7.43956	1.55756	Up_regulated
Cmtm6	8.65424	1.4796	Up_regulated
Cnnm2	9.84433	1.72972	Up_regulated
Cnpy1	8.79004	13.1369	Up_regulated
Coa7	8.78004	1.61799	Up_regulated
Cobl	2.49368	1.20339	Up_regulated
Col13a1	8.70532	5.72714	Up_regulated
Col26a1	1.79701	5.85532	Up_regulated
Col9a2	7.01173	5.19231	Up_regulated
Commd10	9.78165	1.05031	Up_regulated
Coro2b	7.70499	2.24436	Up_regulated
Cox7a1	8.14295	2.06473	Up_regulated
Cplx1	7.73772	4.10502	Up_regulated
Cpne1	8.51758	1.78071	Up_regulated
Cpne5	7.76964	7.81609	Up_regulated
Cps1	1.91599	2.35815	Up_regulated
Cpsf4l	8.61975	6.10304	Up_regulated
Cpsf6	7.74483	1.60122	Up_regulated
Cpvl	6.97949	7.20799	Up_regulated
Cradd	8.72807	1.23417	Up_regulated
Crebzf	7.96431	1.04422	Up_regulated
Crlf3	8.61037	1.68167	Up_regulated
Crtac1	7.54931	4.71376	Up_regulated
Cry1	1.14124	2.17212	Up_regulated
Csf2	7.73332	4.57756	Up_regulated
Csnk2a1	7.36054	1.08245	Up_regulated
Cspp1	9.09023	1.57733	Up_regulated
Csrnp3	8.54297	7.17333	Up_regulated
Cstf3	8.45702	1.10356	Up_regulated
Ctbp2	8.70337	1.59126	Up_regulated
Cth	10.0633	1.89276	Up_regulated
Ctnnal1	10.2912	1.75573	Up_regulated
Ctnnbl1	1.02406	1.15633	Up_regulated
Cwc22	9.27939	1.34888	Up_regulated
Cwh43	9.80712	4.03045	Up_regulated
Cxcl10	7.36623	1.46549	Up_regulated
Cyb561	1.14092	2.22147	Up_regulated
Cyct	7.95819	8.52612	Up_regulated
Cyp27b1	7.754	1.73365	Up_regulated
Cyp2b23	9.75911	6.89293	Up_regulated
Cyp2s1	7.79279	1.58268	Up_regulated
Cysltr2	8.66533	6.26589	Up_regulated
D1Pas1	8.41739	10.8705	Up_regulated
D230025D16Rik	8.57212	2.5086	Up_regulated
D430041D05Rik	8.88417	5.75676	Up_regulated
D630039A03Rik	9.39658	2.54525	Up_regulated
Dapk2	9.04457	2.5389	Up_regulated
Dars	8.67354	1.22049	Up_regulated
Dbf4	7.40202	1.64837	Up_regulated
Dcaf1	7.39562	1.69679	Up_regulated
Dcbld1	8.11775	1.84725	Up_regulated
Dck	10.0412	1.43671	Up_regulated
Dcp2	9.06396	2.78546	Up_regulated
Dcps	7.83526	1.08564	Up_regulated
Ddb2	7.12676	2.06629	Up_regulated
Ddx10	2.75307	1.46565	Up_regulated
Ddx18	9.42952	1.20184	Up_regulated
Ddx20	8.72208	2.20133	Up_regulated
Dennd2c	9.09289	2.53571	Up_regulated
Dennd6a	8.71253	1.04797	Up_regulated
Depdc1b	1.28354	2.09469	Up_regulated
Depdc5	7.71562	1.40131	Up_regulated
Deptor	9.43326	2.31222	Up_regulated
Dera	7.98329	1.08052	Up_regulated
Derl3	7.7014	1.82703	Up_regulated
Dgcr8	8.00167	1.40307	Up_regulated
Dhcr24	8.54927	1.06457	Up_regulated
Dhx35	1.49059	1.17327	Up_regulated
Dhx37	7.81979	1.29631	Up_regulated
Dicer1	7.17364	1.02997	Up_regulated
Dio3	7.53093	7.21704	Up_regulated
Dis3	8.55236	1.2336	Up_regulated
Dlgap5	7.57041	1.70742	Up_regulated
Dll1	7.39789	2.48922	Up_regulated
Dmbx1	7.77847	6.03001	Up_regulated
Dmc1	8.66308	5.61551	Up_regulated
Dmrt3	8.64587	6.06114	Up_regulated
Dna2	7.73385	3.42289	Up_regulated
Dnah14	7.6686	2.27381	Up_regulated
Dnah17	8.60541	1.7724	Up_regulated
Dnah7a	8.57433	2.83711	Up_regulated
Dnah8	11.2494	7.50083	Up_regulated
Dnajb13	7.56549	2.73558	Up_regulated
Dnajb6	9.72138	1.28942	Up_regulated
Dnajc19	9.60238	1.3223	Up_regulated
Dnajc21	7.18347	2.21747	Up_regulated
Dnajc22	8.12085	3.43606	Up_regulated
Dnajc27	7.81529	1.36168	Up_regulated
Dnajc6	8.77257	8.13828	Up_regulated
Dnmt3l	7.96042	12.4862	Up_regulated
Dock6	7.93734	1.69781	Up_regulated
Dpf1	8.21639	1.91805	Up_regulated
Dpp6	10.1801	2.95305	Up_regulated
Dppa2	8.20331	9.8021	Up_regulated
Dppa3	8.3086	9.62931	Up_regulated
Drosha	7.08159	1.39537	Up_regulated
Dsg2	1.11285	6.37682	Up_regulated
Dtwd2	1.18163	2.37126	Up_regulated
Dus1l	8.35451	1.4172	Up_regulated
Dus3l	8.43791	1.30397	Up_regulated
E130308A19Rik	9.53475	1.21847	Up_regulated
Echdc2	7.95038	2.14258	Up_regulated
Ect2	8.58664	1.95377	Up_regulated
Eed	8.77076	2.61145	Up_regulated
Eefsec	8.53211	1.13473	Up_regulated
Efcab11	7.70835	1.44388	Up_regulated
Efhb	1.0775	5.10001	Up_regulated
Efna2	7.84758	1.6088	Up_regulated
Eif2b4	7.52536	1.60859	Up_regulated
Eif2s2	9.22365	1.95036	Up_regulated
Eif4a2	8.43636	1.20213	Up_regulated
Eif4ebp2	8.79471	1.23711	Up_regulated
Elavl2	10.1678	1.25518	Up_regulated
Elmo1	1.21209	2.01053	Up_regulated
Elovl2	7.2442	7.65245	Up_regulated
Elovl7	7.58144	1.15791	Up_regulated
Emilin3	1.436	2.70742	Up_regulated
Eml4	9.05828	2.21499	Up_regulated
Enah	9.62821	1.112	Up_regulated
Endog	8.33171	1.26072	Up_regulated
Ep300	8.70982	1.43111	Up_regulated
Ep400	8.19419	1.30155	Up_regulated
Epas1	8.62174	1.16573	Up_regulated
Epb41l4a	1.36289	3.1373	Up_regulated
Epb41l4b	7.2473	2.40067	Up_regulated
Epb41l5	10.6007	1.99564	Up_regulated
Epc2	10.0888	1.18466	Up_regulated
Epcam	7.62124	10.1452	Up_regulated
Ephx2	7.77211	3.53731	Up_regulated
Epn2	7.36203	1.14093	Up_regulated
Espl1	7.32163	2.7033	Up_regulated
Esrp1	7.81704	10.6991	Up_regulated
Esrrb	8.45872	11.9072	Up_regulated
Etf1	8.70321	1.19773	Up_regulated
Etv1	1.94808	1.76275	Up_regulated
Etv5	7.2019	2.94459	Up_regulated
Exo1	7.30857	2.50546	Up_regulated
Exoc6	8.61666	1.26799	Up_regulated
Exosc2	7.80209	1.51302	Up_regulated
Ezh2	7.48277	2.26906	Up_regulated
F2	7.04392	4.24475	Up_regulated
Faah	6.91227	3.04697	Up_regulated
Fam133b	7.73615	1.13796	Up_regulated
Fam160a2	7.68578	1.15512	Up_regulated
Fam169a	7.81726	5.73236	Up_regulated
Fam178b	9.41143	7.29852	Up_regulated
Fam221a	9.68094	2.5992	Up_regulated
Fam222a	9.24704	3.53301	Up_regulated
Fam241b	7.63185	1.5948	Up_regulated
Fam49b	9.65031	1.56663	Up_regulated
Fancc	7.82712	1.30243	Up_regulated
Fancd2	8.22824	2.24009	Up_regulated
Fancd2os	7.9149	3.63202	Up_regulated
Fancl	7.22003	1.97132	Up_regulated
Fancm	7.76157	2.35781	Up_regulated
Fasn	8.45498	1.0124	Up_regulated
Fbl	8.97361	1.51701	Up_regulated
Fbrsl1	8.92654	3.11319	Up_regulated
Fbxl14	7.75028	1.32241	Up_regulated
Fbxo15	9.40305	12.3082	Up_regulated
Fbxo2	7.46102	1.35526	Up_regulated
Fbxo22	8.56876	1.62624	Up_regulated
Fem1b	7.15911	1.80284	Up_regulated
Fen1	7.61885	2.30198	Up_regulated
Fezf2	8.6844	6.19153	Up_regulated
Ffar4	7.55429	5.46149	Up_regulated
Fgd4	8.98547	1.71633	Up_regulated
Fgd5	8.70459	2.44292	Up_regulated
Fgfbp1	7.85209	2.2006	Up_regulated
Fiz1	7.48277	2.11366	Up_regulated
Fkbp5	8.64827	3.05431	Up_regulated
Fmnl1	7.76111	1.35788	Up_regulated
Foxa2	7.57066	6.69897	Up_regulated
Foxe1	7.39574	4.66562	Up_regulated
Foxi3	1.29169	8.41043	Up_regulated
Foxn2	9.65617	1.22647	Up_regulated
Foxn4	7.52789	9.27307	Up_regulated
Frem2	8.39252	5.73224	Up_regulated
Frmd5	7.11913	1.95797	Up_regulated
Fsd1l	7.11674	2.75607	Up_regulated
Fubp1	7.43285	2.20773	Up_regulated
Fut9	1.85251	9.83263	Up_regulated
Fxr1	7.03604	1.44988	Up_regulated
Fzd5	7.47949	3.11163	Up_regulated
Fzr1	8.0094	1.0686	Up_regulated
G2e3	9.74799	1.02875	Up_regulated
G3bp1	7.72892	1.14193	Up_regulated
Gab1	7.72172	2.89329	Up_regulated
Gabrb3	9.11032	2.37227	Up_regulated
Gabrr1	8.59926	6.23404	Up_regulated
Galnt16	7.44696	1.52	Up_regulated
Galnt6	7.19299	4.76086	Up_regulated
Galnt9	8.89545	3.70369	Up_regulated
Gas2l3	9.76076	1.15208	Up_regulated
Gcnt2	8.55268	3.36029	Up_regulated
Gfm2	7.8031	1.26426	Up_regulated
Ggnbp1	7.45633	1.7935	Up_regulated
Ggt1	7.17694	4.62515	Up_regulated
Ghsr	8.79397	5.9363	Up_regulated
Gimap9	8.65186	1.89652	Up_regulated
Gja4	8.29946	2.00281	Up_regulated
Gjb3	7.55243	2.2788	Up_regulated
Gk5	9.33671	2.12223	Up_regulated
Gldc	7.34845	5.6436	Up_regulated
Gli2	9.60168	2.68026	Up_regulated
Gls2	7.77561	2.92355	Up_regulated
Glt1d1	1.24059	7.69542	Up_regulated
Glul	7.3223	1.60547	Up_regulated
Glyatl3	7.31356	5.819	Up_regulated
Gm10324	2.11508	10.8988	Up_regulated
Gm12569	7.3047	8.19725	Up_regulated
Gm13199	8.28684	1.50888	Up_regulated
Gm14124	8.24728	9.47824	Up_regulated
Gm14139	7.54866	9.0326	Up_regulated
Gm14295	8.25833	2.32934	Up_regulated
Gm14322	7.21695	3.21969	Up_regulated
Gm14325	8.36514	1.64454	Up_regulated
Gm14393	10.0864	4.88151	Up_regulated
Gm14403	8.52963	1.2454	Up_regulated
Gm14410	2.27529	1.33717	Up_regulated
Gm14440	7.04831	3.02259	Up_regulated
Gm2004	8.41295	4.577	Up_regulated
Gm2832	8.18344	7.87896	Up_regulated
Gm3604	10.1148	3.3458	Up_regulated
Gm4737	1.0964	1.68596	Up_regulated
Gm5134	8.23913	7.21921	Up_regulated
Gm572	7.18107	5.37502	Up_regulated
Gm8909	7.19628	10.4812	Up_regulated
Gmnc	8.70221	7.51189	Up_regulated
Gmnn	8.67226	2.6981	Up_regulated
Gnat1	7.88574	5.72242	Up_regulated
Gnaz	1.74832	1.58164	Up_regulated
Gon4l	8.02877	1.2317	Up_regulated
Gpa33	7.56545	9.74745	Up_regulated
Gpatch8	1.34397	1.05937	Up_regulated
Gpn1	8.38513	1.66532	Up_regulated
Gpr139	7.76704	5.55596	Up_regulated
Gpr143	6.9888	5.49546	Up_regulated
Gpr151	1.4573	2.89758	Up_regulated
Gpr160	8.95002	3.55812	Up_regulated
Gpr83	8.97011	5.95804	Up_regulated
Gprin2	6.93996	1.74339	Up_regulated
Gramd2	7.2208	1.16369	Up_regulated
Grb7	7.74049	10.2679	Up_regulated
Grhl2	7.61825	6.22747	Up_regulated
Grik3	9.11901	6.0533	Up_regulated
Grk3	7.5449	1.72998	Up_regulated
Grm4	8.72146	2.77955	Up_regulated
Grsf1	8.05015	1.72696	Up_regulated
Gsta3	8.14765	5.70309	Up_regulated
Gsta4	7.91214	3.18095	Up_regulated
Gstp2	8.4778	4.16121	Up_regulated
Gstp3	7.77294	7.25374	Up_regulated
Gtf2e1	7.89109	1.21972	Up_regulated
Gtf2h2	7.6111	1.04675	Up_regulated
Gtf3c2	9.16827	1.26194	Up_regulated
Gtf3c4	7.41651	1.10076	Up_regulated
Gtsf1	7.94472	5.66311	Up_regulated
Gulo	8.59563	7.23633	Up_regulated
H2-Q4	7.62514	2.03078	Up_regulated
H2afv	7.78575	2.27728	Up_regulated
H2afx	7.41233	2.85084	Up_regulated
H3f3a	7.99051	1.11084	Up_regulated
Hacd2	6.99444	1.04772	Up_regulated
Hadh	7.34985	1.18626	Up_regulated
Has3	9.45199	1.9327	Up_regulated
Hat1	8.31871	3.0477	Up_regulated
Haus1	7.56794	1.73952	Up_regulated
Heatr1	8.43757	1.90328	Up_regulated
Helb	7.44362	3.08552	Up_regulated
Hells	9.03709	3.24864	Up_regulated
Helz	7.92859	1.25654	Up_regulated
Hesx1	9.0068	8.13313	Up_regulated
Hexim1	7.7491	1.92135	Up_regulated
Hexim2	7.73225	2.08735	Up_regulated
Hfm1	7.77775	4.47596	Up_regulated
Hhex	7.47886	2.85522	Up_regulated
Hjurp	9.11254	1.09263	Up_regulated
Hlf	7.31503	4.66817	Up_regulated
Hmces	8.28387	1.65202	Up_regulated
Hmga1	7.88393	1.50329	Up_regulated
Hmgb2	8.69462	3.85467	Up_regulated
Hnrnph3	7.56114	1.33076	Up_regulated
Hormad1	8.13848	7.64527	Up_regulated
Hormad2	9.21653	9.39111	Up_regulated
Hpdl	7.91552	2.36519	Up_regulated
Hrnr	8.39144	7.81826	Up_regulated
Hsd17b14	7.50745	9.61898	Up_regulated
Hsd17b3	1.42736	4.45619	Up_regulated
Hsf2bp	7.80247	9.58691	Up_regulated
Hsp90aa1	8.34448	1.86594	Up_regulated
Hspa14	7.89941	1.79329	Up_regulated
Hspa8	7.56237	1.05111	Up_regulated
Hspbap1	6.741	2.14271	Up_regulated
Htr5a	7.9481	6.09699	Up_regulated
Hus1	8.40583	1.26974	Up_regulated
Hvcn1	8.96553	5.81387	Up_regulated
Icosl	8.27919	5.75812	Up_regulated
Ido2	9.48079	5.80115	Up_regulated
Ier2	8.6927	1.30648	Up_regulated
Ifitm1	7.53112	6.75171	Up_regulated
Ifitm7	9.3842	6.65288	Up_regulated
Ifnlr1	7.2473	2.58757	Up_regulated
Igfals	7.57469	3.5318	Up_regulated
Igfbpl1	7.62699	4.92677	Up_regulated
Igsf9	7.30322	3.1336	Up_regulated
Ihh	7.59057	2.90919	Up_regulated
Il23a	7.80734	6.27843	Up_regulated
Il34	7.93815	2.3974	Up_regulated
Ilf3	7.64542	1.67778	Up_regulated
Impa2	7.4893	3.48709	Up_regulated
Inava	7.79102	1.61722	Up_regulated
Ing1	7.3916	1.51545	Up_regulated
Ing2	8.88277	1.14183	Up_regulated
Ino80	8.77059	1.24238	Up_regulated
Inpp5d	9.58558	5.84119	Up_regulated
Insm1	8.60238	7.78145	Up_regulated
Ints6	7.74538	1.30892	Up_regulated
Ipo5	9.06725	1.10947	Up_regulated
Ipo8	8.58702	1.22327	Up_regulated
Ireb2	9.93032	1.11793	Up_regulated
Irf1	8.84988	1.94731	Up_regulated
Irf9	7.0288	1.32194	Up_regulated
Irx4	8.45141	6.19653	Up_regulated
Ism2	8.79839	4.54518	Up_regulated
Isoc2a	8.07467	1.15785	Up_regulated
Itgae	7.71728	1.90955	Up_regulated
Itpk1	7.9052	4.15891	Up_regulated
Izumo2	7.41645	5.16801	Up_regulated
Jag2	7.4893	1.77029	Up_regulated
Jak3	7.72163	3.58402	Up_regulated
Jakmip1	9.00836	9.19598	Up_regulated
Jarid2	1.67897	4.04324	Up_regulated
Jmjd1c	7.82793	1.3803	Up_regulated
Kank3	7.66632	2.22584	Up_regulated
Kat6b	10.4428	3.52656	Up_regulated
Kbtbd11	7.47488	3.74649	Up_regulated
Kbtbd8	8.83046	5.84317	Up_regulated
Kcnc3	8.98893	3.91838	Up_regulated
Kcnh2	7.83577	1.85364	Up_regulated
Kcnip2	8.29463	4.73935	Up_regulated
Kcnj12	7.69315	6.65118	Up_regulated
Kcnk5	8.80588	4.62597	Up_regulated
Kcnq3	8.61401	3.14982	Up_regulated
Kcns3	9.20618	3.51266	Up_regulated
Kdm1a	7.30248	1.55089	Up_regulated
Kdm3a	8.49394	2.82869	Up_regulated
Kdm4b	8.56558	1.22454	Up_regulated
Khdc4	7.78573	1.14335	Up_regulated
Kif13b	9.43915	1.09543	Up_regulated
Kif14	7.42675	1.29305	Up_regulated
Kif18a	8.69333	2.035	Up_regulated
Kif24	7.79521	1.72306	Up_regulated
Kif26a	7.32364	2.63417	Up_regulated
Kifc2	7.79414	3.04235	Up_regulated
Kifc5b	8.67715	1.65506	Up_regulated
Klf2	7.52091	4.04368	Up_regulated
Klhl12	7.64833	1.71113	Up_regulated
Kndc1	7.78468	8.95459	Up_regulated
Kremen2	6.9486	5.65759	Up_regulated
Krt42	7.61402	10.6031	Up_regulated
Ksr1	8.07235	1.30472	Up_regulated
Ksr2	1.15681	7.71584	Up_regulated
L1td1	8.15824	5.22521	Up_regulated
L3mbtl2	9.13006	3.04638	Up_regulated
Lad1	7.88929	3.88527	Up_regulated
Lamc2	9.3369	1.40124	Up_regulated
Large2	8.36596	8.24135	Up_regulated
Larp4	7.52789	1.32866	Up_regulated
Lax1	7.32302	1.98884	Up_regulated
Ldhc	7.99192	6.55255	Up_regulated
Lef1	9.29029	3.39174	Up_regulated
Lhfpl5	8.99856	7.11483	Up_regulated
Lhpp	7.41856	3.55105	Up_regulated
Lifr	9.28662	2.74969	Up_regulated
Lig1	7.13005	3.05633	Up_regulated
Lin28b	9.0686	3.9715	Up_regulated
Lin52	10.0755	1.05566	Up_regulated
Lin54	7.98464	1.05431	Up_regulated
Lin9	9.40788	1.01428	Up_regulated
Lipc	8.14892	7.84537	Up_regulated
Lmnb2	7.23713	2.30612	Up_regulated
Lmtk2	8.78868	1.42487	Up_regulated
Lpar1	1.04034	1.15891	Up_regulated
Lpcat1	7.53423	1.55538	Up_regulated
Lrba	1.37105	1.29223	Up_regulated
Lrfn1	8.66361	2.09466	Up_regulated
Lrmp	7.66227	6.68103	Up_regulated
Lrrc18	7.3463	6.79411	Up_regulated
Lrrn2	9.8983	4.15431	Up_regulated
Lsg1	7.75246	1.09342	Up_regulated
Lsm3	9.56072	2.30224	Up_regulated
Ly75	8.34258	1.6038	Up_regulated
M1ap	9.43483	2.85488	Up_regulated
Mad2l1	8.74189	1.87462	Up_regulated
Mageb16	8.53265	12.3624	Up_regulated
Mak	7.54743	3.15892	Up_regulated
Manba	9.75669	2.4273	Up_regulated
Map10	7.13088	1.44267	Up_regulated
Map2k6	8.60451	2.32827	Up_regulated
Map3k5	8.06024	2.04519	Up_regulated
Mapt	9.57708	4.21272	Up_regulated
2022-03-11	7.75145	7.08732	Up_regulated
2022-03-07	8.5229	1.14005	Up_regulated
Marveld2	1.00465	4.85828	Up_regulated
Marveld3	8.43698	6.17462	Up_regulated
Matr3	8.95455	1.03918	Up_regulated
Mcm4	7.50743	2.23955	Up_regulated
Mcm5	8.48598	3.28921	Up_regulated
Mcmbp	8.05149	1.43932	Up_regulated
Mcmdc2	7.71442	4.1374	Up_regulated
Mcph1	1.57212	1.12132	Up_regulated
Mcrs1	8.3128	1.61799	Up_regulated
Mctp2	9.10416	1.27016	Up_regulated
Mdm1	9.67143	1.96891	Up_regulated
Meaf6	8.27763	2.04327	Up_regulated
Med18	7.62717	1.94559	Up_regulated
Med26	8.34056	1.44662	Up_regulated
Mef2b	7.94989	3.71436	Up_regulated
Megf11	7.36482	1.52052	Up_regulated
Melk	7.69285	1.51766	Up_regulated
Mep1b	9.05521	10.4063	Up_regulated
Mettl2	7.73986	1.09584	Up_regulated
Mettl5	7.58692	1.18833	Up_regulated
Mex3a	7.2995	1.68235	Up_regulated
Mfsd10	7.61645	1.72862	Up_regulated
Mga	8.77971	1.90128	Up_regulated
Mgarp	7.63132	3.4267	Up_regulated
Mgat4e	7.82336	3.9036	Up_regulated
Mgat5b	8.32048	4.06995	Up_regulated
Mier1	7.85906	1.07828	Up_regulated
Miga1	8.29842	2.01854	Up_regulated
Minar1	1.22986	5.63961	Up_regulated
Mip	8.50213	4.46923	Up_regulated
Mis18a	8.42124	1.74453	Up_regulated
Mkrn1	8.16958	3.08239	Up_regulated
Mkrn2	7.68295	1.32721	Up_regulated
Mkrn3	7.66747	2.62451	Up_regulated
Mlana	7.16649	5.75432	Up_regulated
Mlh1	8.42414	1.97731	Up_regulated
Mlxipl	8.12007	3.61197	Up_regulated
Mns1	7.45711	2.10045	Up_regulated
Mok	9.02107	3.19928	Up_regulated
Morc1	7.58755	9.80729	Up_regulated
Morc3	8.46655	1.99157	Up_regulated
Mphosph8	7.98453	1.32683	Up_regulated
Mre11a	8.02027	1.18488	Up_regulated
Mreg	7.83835	6.18122	Up_regulated
Mrpl15	9.65873	1.55142	Up_regulated
Mrpl40	7.30386	1.44908	Up_regulated
Mrpl45	8.34207	1.29231	Up_regulated
Mrps18b	7.39927	1.22059	Up_regulated
Mrps18c	7.69226	1.01173	Up_regulated
Mrps28	9.22908	1.00713	Up_regulated
Mrps31	7.61706	1.43943	Up_regulated
Msantd2	7.43888	2.2629	Up_regulated
Msc	9.76773	1.81052	Up_regulated
Msl2	8.59514	1.57375	Up_regulated
Msrb2	7.68559	1.68081	Up_regulated
Mt1	8.0396	3.5121	Up_regulated
Mtf2	7.35918	3.94548	Up_regulated
Mtfr2	7.3613	1.36654	Up_regulated
Mthfd1	8.30935	1.89303	Up_regulated
Mthfd1l	1.15872	1.49368	Up_regulated
Mtmr14	9.67253	1.50153	Up_regulated
Mtrex	9.26843	1.20945	Up_regulated
Mtus2	1.39602	1.12623	Up_regulated
Muc3	8.64688	6.58893	Up_regulated
Myb	7.44702	5.35397	Up_regulated
Mybbp1a	8.18729	1.23786	Up_regulated
Mybpc1	7.37614	4.10448	Up_regulated
Myh14	7.50496	4.92595	Up_regulated
Mynn	7.84758	1.10957	Up_regulated
Myo15b	8.71018	8.58638	Up_regulated
Myo5b	8.69876	3.20851	Up_regulated
Myo5c	7.34987	5.69266	Up_regulated
Myom3	8.41305	4.56844	Up_regulated
N4bp1	8.74185	1.23503	Up_regulated
N4bp2	2.23201	1.68992	Up_regulated
Naa11	6.98316	8.53996	Up_regulated
Naa16	7.57287	1.04386	Up_regulated
Naa35	7.45899	1.35965	Up_regulated
Nadk2	7.7654	2.30794	Up_regulated
Nanog	8.0997	11.5954	Up_regulated
Nasp	8.09198	3.95611	Up_regulated
Nat10	8.6501	1.60033	Up_regulated
Ncapd3	7.96962	1.09958	Up_regulated
Nckap1l	7.81618	1.19397	Up_regulated
Ncoa3	9.15075	2.65273	Up_regulated
Ncor1	10.1668	1.32017	Up_regulated
Ndrg1	6.78421	2.44169	Up_regulated
Ndufaf6	7.51643	1.35255	Up_regulated
Neb	9.01393	2.54438	Up_regulated
Nefl	7.86674	4.03591	Up_regulated
Nek2	7.51324	1.63478	Up_regulated
Nemp1	7.80359	2.18067	Up_regulated
Neurog3	6.90437	5.29697	Up_regulated
Nf2	7.93392	1.44078	Up_regulated
Nfasc	1.29004	2.68919	Up_regulated
Nfatc2	8.82056	1.90938	Up_regulated
Nfrkb	8.05943	1.23783	Up_regulated
Nfx1	7.40963	1.0265	Up_regulated
Nfyc	8.06444	1.15472	Up_regulated
Ninl	7.84799	1.9626	Up_regulated
Nkx6-3	7.45036	8.04079	Up_regulated
Nlrp12	8.08282	11.6418	Up_regulated
Noc3l	9.15642	1.08163	Up_regulated
Nodal	8.686	9.71802	Up_regulated
Nol6	7.82034	1.5284	Up_regulated
Nol8	7.3231	1.29464	Up_regulated
Nolc1	8.1971	1.72439	Up_regulated
Nop53	7.58877	1.03163	Up_regulated
Nos1	9.99954	7.30737	Up_regulated
Nova2	7.26713	1.45524	Up_regulated
Noxred1	7.40963	4.54475	Up_regulated
Npl	7.62236	3.44242	Up_regulated
Npm3	7.60808	1.5274	Up_regulated
Npy	7.92691	2.83036	Up_regulated
Nr1i2	8.35747	4.5047	Up_regulated
Nrde2	7.47948	1.56554	Up_regulated
Nrf1	9.34322	1.26272	Up_regulated
Nrg4	7.11497	2.76508	Up_regulated
Nrxn2	7.43961	4.195	Up_regulated
Nsun5	8.01708	1.27998	Up_regulated
Ntn1	8.75485	1.67038	Up_regulated
Nubpl	8.88513	1.6225	Up_regulated
Nucks1	9.1276	1.63471	Up_regulated
Nudt16l1	8.4416	1.4985	Up_regulated
Nufip2	7.14349	1.16275	Up_regulated
Nup107	7.09873	1.38255	Up_regulated
Nup155	7.27174	1.39154	Up_regulated
Nup160	7.14253	1.61388	Up_regulated
Nup205	9.47605	1.11354	Up_regulated
Nup210	9.05459	6.15133	Up_regulated
Nup214	7.65067	1.04382	Up_regulated
Nup88	7.94794	1.16048	Up_regulated
Nup98	9.26399	1.12792	Up_regulated
Nxph4	7.70611	2.45692	Up_regulated
Nxt1	7.79842	1.56238	Up_regulated
Oas1a	7.98215	4.30858	Up_regulated
Oas1d	8.50696	5.1897	Up_regulated
Obox6	9.5634	8.17414	Up_regulated
Ocln	9.40739	7.05968	Up_regulated
Ogdhl	9.74602	2.26945	Up_regulated
Olfml1	7.87073	3.25181	Up_regulated
Olfr222	7.50743	5.28748	Up_regulated
Olfr985	7.69146	7.72166	Up_regulated
Olfr986	7.15585	7.53895	Up_regulated
Onecut2	7.67665	3.78749	Up_regulated
Orc2	8.84832	1.75208	Up_regulated
Otx1	10.3869	2.4336	Up_regulated
Otx2	8.42705	10.8763	Up_regulated
P2rx2	7.97285	5.26978	Up_regulated
Padi2	7.54617	6.27944	Up_regulated
Padi3	7.22933	6.56374	Up_regulated
Paics	7.5242	1.6492	Up_regulated
Paox	8.00613	1.53116	Up_regulated
Pard6b	7.58695	2.47011	Up_regulated
Parp1	8.88366	3.10009	Up_regulated
Pask	7.38111	1.96478	Up_regulated
Pax6	8.40542	5.99055	Up_regulated
Paxip1	8.15054	2.03093	Up_regulated
Pccb	7.49519	1.32018	Up_regulated
Pcf11	9.04429	1.86182	Up_regulated
Pcgf6	7.92339	2.42409	Up_regulated
Pclo	7.50938	1.21641	Up_regulated
Pcsk1	10.3759	4.00734	Up_regulated
Pdcd2l	7.87324	1.3154	Up_regulated
Pdcd7	7.55615	1.99146	Up_regulated
Pde9a	8.10695	2.2661	Up_regulated
Pdk1	8.49261	2.49939	Up_regulated
Pdp2	8.52896	1.70463	Up_regulated
Pds5a	7.62598	1.07981	Up_regulated
Pdss1	7.9349	1.91963	Up_regulated
Pdzd4	8.41924	3.39232	Up_regulated
Pes1	7.70499	1.14575	Up_regulated
Pex7	7.84902	1.14828	Up_regulated
Pfkl	8.01617	1.38377	Up_regulated
Pgam1	7.40545	1.01395	Up_regulated
Pgap1	8.47689	3.19692	Up_regulated
Phf20	8.23598	1.47075	Up_regulated
Phf21b	7.61588	3.1885	Up_regulated
Phyh	9.36628	2.9595	Up_regulated
Phyhipl	7.07305	4.94923	Up_regulated
Phykpl	1.77024	1.13755	Up_regulated
Pias2	8.90139	1.81828	Up_regulated
Pigo	7.03321	1.37589	Up_regulated
Pik3r4	8.68712	1.20747	Up_regulated
Pim3	8.20421	1.77302	Up_regulated
Piwil2	7.91454	4.09713	Up_regulated
Pkd1l2	9.22504	6.12343	Up_regulated
Pkd2l1	8.08261	4.83529	Up_regulated
Pla2g10	7.94375	5.51858	Up_regulated
Pla2g4e	7.53486	10.3673	Up_regulated
Plcxd1	8.6916	1.62906	Up_regulated
Plekha4	7.52215	2.51865	Up_regulated
Plekhd1	7.34909	7.9735	Up_regulated
Plekhf2	9.3723	3.03098	Up_regulated
Plekhg5	7.63525	1.44135	Up_regulated
Plekhm1	9.47058	1.42148	Up_regulated
Plet1	7.55178	5.09652	Up_regulated
Plk1	7.54554	1.7633	Up_regulated
Pms2	8.71889	1.2285	Up_regulated
Pnldc1	7.86371	6.44308	Up_regulated
Pnma2	7.48346	4.44003	Up_regulated
Pnn	7.4423	1.54715	Up_regulated
Pnpla3	7.15979	1.06725	Up_regulated
Pnpla6	7.36412	1.6862	Up_regulated
Polg2	7.75625	1.35363	Up_regulated
Polr3b	8.73763	1.70432	Up_regulated
Pop1	8.67967	1.42071	Up_regulated
Pop5	8.62528	1.40499	Up_regulated
Pot1a	7.77187	1.10464	Up_regulated
Pou2f3	8.20268	10.4042	Up_regulated
Pou3f2	8.5643	7.66726	Up_regulated
Pou4f2	1.07978	7.54925	Up_regulated
Ppa1	7.63365	1.65171	Up_regulated
Ppargc1b	7.9144	2.23947	Up_regulated
Ppip5k2	9.07366	1.16764	Up_regulated
Ppp1r16b	7.39581	3.84718	Up_regulated
Ppp1r1a	7.83109	5.20406	Up_regulated
Ppp1r8	8.09397	1.09104	Up_regulated
Ppp2r2d	7.57225	1.5969	Up_regulated
Ppp4r4	7.27848	1.70897	Up_regulated
Ppp6r3	1.15169	1.30582	Up_regulated
Prcc	8.05499	1.38602	Up_regulated
Prdm1	9.25897	4.5324	Up_regulated
Prdm10	8.82322	1.56609	Up_regulated
Prdm14	7.16395	11.3982	Up_regulated
Prelid2	1.73489	1.07374	Up_regulated
Prelid3a	7.19232	1.09626	Up_regulated
Prg4	1.62483	3.88021	Up_regulated
Prkcg	8.65554	1.07888	Up_regulated
Prlr	1.12742	1.47615	Up_regulated
Prmt8	8.1426	6.55076	Up_regulated
Proc	8.75037	7.39457	Up_regulated
Prpf38a	10.0607	1.24592	Up_regulated
Prph	7.8661	1.81501	Up_regulated
Prps1l3	8.62953	1.4135	Up_regulated
Prss33	7.39089	5.23404	Up_regulated
Prtg	7.89749	2.99768	Up_regulated
Prune1	7.71226	2.02221	Up_regulated
Prune2	7.29196	2.01958	Up_regulated
Psma8	8.8004	5.46525	Up_regulated
Psmc3ip	7.56052	2.18798	Up_regulated
Psmc5	7.63897	1.00774	Up_regulated
Psme4	1.4218	1.22944	Up_regulated
Psmg1	9.90498	1.73036	Up_regulated
Ptcd3	7.85209	1.07102	Up_regulated
Ptch1	8.52783	1.67839	Up_regulated
Ptch2	8.20804	10.8837	Up_regulated
Ptpn4	10.1932	1.24415	Up_regulated
Ptrhd1	8.33602	1.0969	Up_regulated
Pum1	9.31497	1.10246	Up_regulated
Pus10	8.15941	1.21756	Up_regulated
Pwwp2a	7.96787	2.02466	Up_regulated
Pzp	7.845	4.86689	Up_regulated
Rab11fip1	7.57286	1.86494	Up_regulated
Rab11fip4	8.00213	7.27846	Up_regulated
Rab19	7.04305	4.76189	Up_regulated
Rab6b	8.8011	1.65898	Up_regulated
Rad51	7.94338	2.20935	Up_regulated
Rad51b	9.26033	1.55726	Up_regulated
Rad51c	8.96223	2.0928	Up_regulated
Rad54b	8.22348	2.49579	Up_regulated
Rad9b	7.89842	2.133	Up_regulated
Rasal1	7.52982	5.02646	Up_regulated
Rasgef1a	8.18467	4.24706	Up_regulated
Rbm12	8.1181	1.26697	Up_regulated
Rbm15	8.69364	1.50474	Up_regulated
Rbm25	7.54305	1.26785	Up_regulated
Rbm47	9.28841	2.97049	Up_regulated
Rbmx2	7.1233	1.89956	Up_regulated
Rbp7	7.07562	4.74542	Up_regulated
Rbpj	8.60301	1.64589	Up_regulated
Rbpms	7.83775	2.39959	Up_regulated
Rcor2	7.80576	5.34233	Up_regulated
Resf1	10.1089	1.99652	Up_regulated
Rest	8.52442	2.66202	Up_regulated
Rev1	9.6304	1.22418	Up_regulated
Rev3l	9.88005	2.13594	Up_regulated
Rfwd3	8.76855	1.44142	Up_regulated
Rhd	8.53426	2.5064	Up_regulated
Rhox9	7.80416	7.16915	Up_regulated
Ric3	8.15941	1.39814	Up_regulated
Rif1	9.99856	4.02108	Up_regulated
Rimkla	7.63369	6.46571	Up_regulated
Rimklb	8.83867	13.1208	Up_regulated
Rims2	10.4959	1.40463	Up_regulated
Riok2	8.68454	1.48001	Up_regulated
Rlbp1	7.58753	10.3722	Up_regulated
Rmnd5a	8.42054	1.34353	Up_regulated
Rnaseh2b	7.27013	2.43322	Up_regulated
Rnd2	7.97566	1.14701	Up_regulated
Rnf138	8.2168	2.27127	Up_regulated
Rnf165	8.38713	3.08962	Up_regulated
Rnf182	7.83202	4.12749	Up_regulated
Rnf2	9.04961	1.03925	Up_regulated
Rnf220	1.90537	1.81752	Up_regulated
Rnf32	9.91657	1.68791	Up_regulated
Rpa1	8.93189	1.32195	Up_regulated
Rpf2	8.56157	1.07718	Up_regulated
Rpgrip1	7.89995	1.82082	Up_regulated
Rpl27	8.40011	1.05085	Up_regulated
Rpl30	7.46502	1.03597	Up_regulated
Rprd2	7.58266	1.20809	Up_regulated
Rps6ka6	8.31722	3.73176	Up_regulated
Rps6kl1	8.65868	3.24433	Up_regulated
Rrn3	7.67722	1.73722	Up_regulated
Rrp12	9.13114	1.1942	Up_regulated
Rrs1	7.58631	1.20485	Up_regulated
Rsbn1	9.07119	1.14277	Up_regulated
Rsl24d1	9.37356	1.39201	Up_regulated
Rtel1	9.66848	2.09541	Up_regulated
Rtp3	7.70718	6.34102	Up_regulated
Rtraf	7.91405	1.10308	Up_regulated
Rundc3b	7.48214	2.80578	Up_regulated
Ruvbl1	7.9091	1.40563	Up_regulated
Rybp	1.41381	2.19572	Up_regulated
Sae1	7.47161	1.02631	Up_regulated
Sall1	1.63881	5.23735	Up_regulated
Sall4	7.97034	13.2177	Up_regulated
Sap130	7.34121	1.21965	Up_regulated
Sarm1	7.60747	4.23476	Up_regulated
Sarnp	9.01475	1.10108	Up_regulated
Saxo1	8.78786	4.87466	Up_regulated
Sbk1	7.67894	2.87552	Up_regulated
Scaf4	9.35376	1.32483	Up_regulated
Scd3	7.38534	4.01789	Up_regulated
Schip1	1.02705	1.37902	Up_regulated
Scn8a	7.38247	5.98692	Up_regulated
Scube2	9.17292	3.23409	Up_regulated
Scube3	8.91355	1.22008	Up_regulated
Sdk2	7.33475	3.81996	Up_regulated
Sec14l4	8.05905	9.92234	Up_regulated
Sema4b	7.80053	2.94698	Up_regulated
2022-09-01	7.3542	6.91082	Up_regulated
2022-09-03	7.89357	1.60882	Up_regulated
Serac1	8.65077	1.09583	Up_regulated
Serbp1	1.37939	1.08054	Up_regulated
Serpina3m	7.68123	9.38498	Up_regulated
Sesn1	7.86378	1.44851	Up_regulated
Setdb1	8.1907	1.783	Up_regulated
Setx	9.92892	2.20707	Up_regulated
Sf3b6	8.23091	1.06198	Up_regulated
Sfmbt2	9.51004	3.40688	Up_regulated
Sfpq	8.50236	1.59487	Up_regulated
Sgk3	8.62479	1.39512	Up_regulated
Shcbp1	7.79419	1.50293	Up_regulated
She	8.28932	1.22757	Up_regulated
Shmt1	7.22313	3.37325	Up_regulated
Siglecf	1.00921	6.49141	Up_regulated
Sinhcaf	9.70378	3.02703	Up_regulated
Sirt1	9.82887	2.82437	Up_regulated
Six4	9.32898	2.72823	Up_regulated
Skap2	7.89749	1.00876	Up_regulated
Skp2	7.81717	1.59959	Up_regulated
Slc12a5	7.7016	1.70444	Up_regulated
Slc12a8	8.97494	1.24843	Up_regulated
Slc15a1	8.90623	7.7031	Up_regulated
Slc15a2	7.63365	3.11437	Up_regulated
Slc16a1	7.90974	1.89455	Up_regulated
Slc17a9	9.12742	4.24919	Up_regulated
Slc1a1	9.06056	4.06478	Up_regulated
Slc1a3	1.46642	1.41279	Up_regulated
Slc1a5	7.56063	1.50224	Up_regulated
Slc23a2	9.29083	1.51067	Up_regulated
Slc23a4	9.431	3.53284	Up_regulated
Slc25a13	8.91476	2.08385	Up_regulated
Slc25a26	7.46569	1.30945	Up_regulated
Slc25a34	7.6123	5.15199	Up_regulated
Slc25a36	9.70272	1.94586	Up_regulated
Slc25a38	8.4751	1.30009	Up_regulated
Slc27a2	7.45705	12.1525	Up_regulated
Slc28a1	7.63602	6.63101	Up_regulated
Slc28a3	9.80622	5.30626	Up_regulated
Slc29a2	7.65474	1.90852	Up_regulated
Slc29a4	9.30422	1.27173	Up_regulated
Slc44a1	1.12301	1.66716	Up_regulated
Slc44a3	6.7089	4.01525	Up_regulated
Slc45a4	8.51223	1.32381	Up_regulated
Slc47a1	8.50213	6.73164	Up_regulated
Slc47a2	7.92039	5.66268	Up_regulated
Slc4a5	7.87371	7.93762	Up_regulated
Slc5a11	8.92405	7.43868	Up_regulated
Slc6a1	7.31787	10.7088	Up_regulated
Slc7a7	7.25417	2.12074	Up_regulated
Slc7a9	8.69614	6.68276	Up_regulated
Slc9b2	8.4113	2.4462	Up_regulated
Smarca5	7.40133	1.34234	Up_regulated
Smarcad1	10.6124	1.98237	Up_regulated
Smc1b	8.32996	2.33435	Up_regulated
Smc3	9.19971	1.66621	Up_regulated
Smg6	8.1205	1.04281	Up_regulated
Smg7	7.17694	1.83712	Up_regulated
Smoc1	8.76933	1.54464	Up_regulated
Smpd4	7.9571	2.0746	Up_regulated
Snrnp40	7.29503	1.81385	Up_regulated
Snrpb2	7.5443	1.23647	Up_regulated
Snu13	7.9277	1.13483	Up_regulated
Snx10	9.83476	1.49367	Up_regulated
Sox13	8.42938	2.09803	Up_regulated
Sox15	7.99347	9.37784	Up_regulated
Sp1	8.13229	1.49382	Up_regulated
Sp4	9.19335	1.38888	Up_regulated
Spc24	7.73002	2.89725	Up_regulated
Spic	8.67178	12.0932	Up_regulated
Spink1	8.36869	5.35719	Up_regulated
Spint2	7.14008	4.30045	Up_regulated
Spock2	1.00768	1.42826	Up_regulated
Spp1	7.65705	3.01474	Up_regulated
Spta1	7.07201	1.90827	Up_regulated
Sptbn2	8.1548	3.65975	Up_regulated
Srl	9.3845	1.96922	Up_regulated
Srrm1	8.66407	1.54463	Up_regulated
Srsf10	7.54554	1.48538	Up_regulated
St14	7.11747	2.54189	Up_regulated
St8sia1	9.81427	7.24298	Up_regulated
Stac2	7.89792	2.17199	Up_regulated
Stag1	9.8192	1.05196	Up_regulated
Stip1	7.94386	1.15276	Up_regulated
Stk31	9.73701	9.39233	Up_regulated
Stk38	8.27361	1.3566	Up_regulated
Stra8	7.93198	4.84675	Up_regulated
Strbp	1.80093	1.01646	Up_regulated
Stx3	9.54286	2.81043	Up_regulated
Sub1	7.31283	1.65365	Up_regulated
Sugt1	8.13096	1.57235	Up_regulated
Supt16	7.72117	1.87014	Up_regulated
Susd2	8.24681	1.24012	Up_regulated
Suv39h2	7.82846	2.52012	Up_regulated
Suz12	7.98783	2.30101	Up_regulated
Swt1	7.71725	1.35069	Up_regulated
Syce1	8.4051	4.99644	Up_regulated
Sycp1	7.41306	2.47611	Up_regulated
Sycp2l	8.40657	6.87744	Up_regulated
Syk	7.58144	1.27747	Up_regulated
Syn3	7.38035	1.84979	Up_regulated
Sypl2	7.56234	2.98741	Up_regulated
Syt14	8.25032	1.14398	Up_regulated
Syt6	7.51384	5.89605	Up_regulated
Syt7	8.91238	2.48138	Up_regulated
Tada3	7.25947	1.36545	Up_regulated
Taf1a	7.64365	1.76696	Up_regulated
Taf4	9.74789	1.06064	Up_regulated
Taf5	8.35301	2.42999	Up_regulated
Taf5l	8.23626	1.7587	Up_regulated
Taf6	7.03692	1.08257	Up_regulated
Tamm41	8.08036	1.7171	Up_regulated
Tarm1	7.08432	6.79411	Up_regulated
Tbl1xr1	2.00872	1.38536	Up_regulated
Tbl2	8.44503	1.35556	Up_regulated
Tbl3	8.10266	1.04858	Up_regulated
Tcea1	9.90066	1.2043	Up_regulated
Tcf7l1	9.48101	1.53896	Up_regulated
Tcof1	8.9159	2.32458	Up_regulated
Tdp2	7.69033	1.91085	Up_regulated
Tdrd5	8.21501	5.55787	Up_regulated
Tdrp	7.69586	2.55263	Up_regulated
Tent4b	7.36694	1.12946	Up_regulated
Tent5c	7.24498	1.76664	Up_regulated
Terf1	1.49007	2.75305	Up_regulated
Tesk2	7.11414	1.05111	Up_regulated
Tet1	7.80732	7.51095	Up_regulated
Tet2	10.0576	3.32377	Up_regulated
Tex10	9.93172	1.27721	Up_regulated
Tex19.2	8.75836	7.29015	Up_regulated
Tex2	8.36468	1.09517	Up_regulated
Tex21	8.41406	8.1884	Up_regulated
Tex9	8.97566	2.34217	Up_regulated
Tfam	8.352	1.54402	Up_regulated
Tfap2a	7.97405	1.12175	Up_regulated
Tfap2c	7.51324	8.29544	Up_regulated
Tfap2e	7.76812	4.64746	Up_regulated
Tfap4	8.40651	2.52836	Up_regulated
Tfeb	8.61903	2.99239	Up_regulated
Tgif1	7.56052	1.21331	Up_regulated
Tgm3	9.25454	3.71724	Up_regulated
Tgs1	7.32891	1.0057	Up_regulated
Thoc3	7.24576	1.47011	Up_regulated
Thpo	9.7471	2.02071	Up_regulated
Thumpd3	8.01226	1.21436	Up_regulated
Ticam2	7.66169	3.56342	Up_regulated
Ticrr	8.57013	4.36295	Up_regulated
Timeless	7.75959	3.09856	Up_regulated
Tjp2	7.99333	2.0108	Up_regulated
Tkt	7.53294	1.05506	Up_regulated
Tle4	1.07362	2.82357	Up_regulated
Tlk1	10.5508	1.26371	Up_regulated
Tlx3	1.61513	4.92098	Up_regulated
Tm6sf2	7.48082	3.16685	Up_regulated
Tmem191c	8.3648	1.9475	Up_regulated
Tmem216	7.62004	1.52168	Up_regulated
Tmem225	8.52519	5.84844	Up_regulated
Tmem231	8.85722	1.0998	Up_regulated
Tmem243	8.94019	2.28028	Up_regulated
Tmem266	8.34698	3.33022	Up_regulated
Tmem79	7.89874	3.23747	Up_regulated
Tmem8	8.30555	4.77533	Up_regulated
Tmpo	7.39858	1.30124	Up_regulated
Tnfrsf19	9.54718	4.45737	Up_regulated
Tnfrsf8	7.68699	5.92619	Up_regulated
Tnn	8.85381	1.93477	Up_regulated
Tnpo1	8.95895	1.12698	Up_regulated
Tns4	8.25297	5.79921	Up_regulated
Toe1	7.83988	1.51729	Up_regulated
Topors	9.24023	1.68307	Up_regulated
Tpd52	8.8554	2.14828	Up_regulated
Tra2a	8.29747	1.40367	Up_regulated
Trh	9.43556	12.5768	Up_regulated
Trim36	7.52597	2.2008	Up_regulated
Trim54	7.66862	2.33199	Up_regulated
Trim6	7.58816	5.25148	Up_regulated
Triml1	9.86144	12.5809	Up_regulated
Trip12	8.4319	1.10006	Up_regulated
Trmt11	9.69803	1.38882	Up_regulated
Trpa1	8.22197	2.26365	Up_regulated
Trpm1	9.2509	8.45078	Up_regulated
Tspan15	7.40826	1.09378	Up_regulated
Ttc27	9.44146	1.48478	Up_regulated
Ttc39b	1.23126	1.06362	Up_regulated
Ttc5	7.62716	1.33565	Up_regulated
Ttc9b	8.54284	2.52153	Up_regulated
Ttf1	7.76972	1.34222	Up_regulated
Ttk	7.96027	1.89417	Up_regulated
Ttll4	7.9472	1.14529	Up_regulated
Ttll6	7.31356	4.28877	Up_regulated
Ttn	7.664	6.26763	Up_regulated
Tuba3a	7.55745	6.86792	Up_regulated
Tulp1	8.74988	2.7035	Up_regulated
Tunar	7.37334	8.38472	Up_regulated
Tut4	9.9321	1.01343	Up_regulated
Twf2	8.96983	1.89864	Up_regulated
Twistnb	8.41295	1.00073	Up_regulated
Txlnb	8.86935	1.59386	Up_regulated
Tyro3	8.56697	2.23863	Up_regulated
U2surp	7.81262	1.37631	Up_regulated
Ubap1l	7.82083	3.18649	Up_regulated
Ubn2	7.64365	1.19201	Up_regulated
Ubr5	9.3424	1.84813	Up_regulated
Ubr7	7.69541	1.81761	Up_regulated
Ubtf	8.58394	1.69683	Up_regulated
Uchl3	8.08335	1.72849	Up_regulated
Uck2	8.39431	1.40784	Up_regulated
Ucma	7.95102	6.89293	Up_regulated
Ulk1	8.03419	2.80706	Up_regulated
Unc13d	7.70046	5.49585	Up_regulated
Ung	7.67092	4.19495	Up_regulated
Upf1	7.8338	1.06343	Up_regulated
Upf3b	9.6432	1.12485	Up_regulated
Urod	8.72459	1.07638	Up_regulated
Use1	7.65822	1.28271	Up_regulated
Usp1	7.99803	1.30371	Up_regulated
Usp10	7.58872	1.55216	Up_regulated
Usp17lb	8.58842	5.07761	Up_regulated
Usp28	8.11573	2.69742	Up_regulated
Usp50	7.51704	2.20026	Up_regulated
Usp54	9.85099	2.14774	Up_regulated
Usp7	9.15061	2.32067	Up_regulated
Utp14b	1.47263	2.26706	Up_regulated
Utp18	8.93425	1.23808	Up_regulated
Utp6	9.2507	1.60479	Up_regulated
Vil1	8.38621	3.55191	Up_regulated
Vps54	8.48205	1.72028	Up_regulated
Vrk1	9.43615	1.86072	Up_regulated
Vwa3a	8.68418	5.29167	Up_regulated
Vwa3b	2.03967	6.179	Up_regulated
Wdhd1	7.25642	2.06426	Up_regulated
Wdr12	8.10523	1.11079	Up_regulated
Wdr27	9.8408	3.21868	Up_regulated
Wdr86	7.69598	10.2681	Up_regulated
Wdr89	7.46303	1.96677	Up_regulated
Wdtc1	7.67034	1.79396	Up_regulated
Wdyhv1	8.24066	1.28816	Up_regulated
Wee1	9.00723	1.81605	Up_regulated
Wnk2	8.72106	3.70456	Up_regulated
Wnt5b	9.23906	2.73359	Up_regulated
Wnt8a	8.28893	6.34382	Up_regulated
Xkr6	7.35986	1.38441	Up_regulated
Xpo1	10.5237	1.5268	Up_regulated
Xpo4	1.279	1.43462	Up_regulated
Xrcc2	8.29568	1.49006	Up_regulated
Xrcc5	9.05225	2.20722	Up_regulated
Yes1	9.07963	2.6638	Up_regulated
Ypel1	1.09996	1.35159	Up_regulated
Ythdc1	7.59968	1.09984	Up_regulated
Zap70	1.04017	4.4994	Up_regulated
Zbed4	7.84461	1.53413	Up_regulated
Zbtb10	2.00071	1.34757	Up_regulated
Zbtb12	9.03836	1.81572	Up_regulated
Zbtb14	7.3584	1.12952	Up_regulated
Zbtb21	7.20336	1.02337	Up_regulated
Zbtb3	7.9009	1.14476	Up_regulated
Zbtb44	8.58195	2.57851	Up_regulated
Zbtb45	9.28559	1.89412	Up_regulated
Zc3h10	7.64365	1.15125	Up_regulated
Zc3h8	7.82757	2.27908	Up_regulated
Zc3hc1	7.79102	1.28778	Up_regulated
Zdbf2	10.2654	1.54121	Up_regulated
Zfand1	8.13661	1.35788	Up_regulated
Zfp119b	7.72005	1.77724	Up_regulated
Zfp141	9.24527	2.43654	Up_regulated
Zfp219	8.11818	1.34821	Up_regulated
Zfp229	8.18859	4.12764	Up_regulated
Zfp24	8.66254	1.12763	Up_regulated
Zfp273	8.70917	2.64351	Up_regulated
Zfp277	7.59368	1.45194	Up_regulated
Zfp280b	8.69172	2.63081	Up_regulated
Zfp280d	10.389	1.07004	Up_regulated
Zfp345	8.81475	9.06704	Up_regulated
Zfp383	7.33466	2.26928	Up_regulated
Zfp41	7.20981	1.72689	Up_regulated
Zfp42	9.83321	12.7184	Up_regulated
Zfp433	7.33475	1.56916	Up_regulated
Zfp459	7.50938	7.58601	Up_regulated
Zfp518b	9.65487	1.26403	Up_regulated
Zfp534	2.79581	11.2441	Up_regulated
Zfp568	8.79947	2.05669	Up_regulated
Zfp598	8.01016	1.20661	Up_regulated
Zfp60	7.54554	1.30499	Up_regulated
Zfp606	7.54991	2.09202	Up_regulated
Zfp607a	7.49259	1.65278	Up_regulated
Zfp607b	8.11271	4.21645	Up_regulated
Zfp619	7.78575	1.8381	Up_regulated
Zfp64	7.77401	1.26657	Up_regulated
Zfp7	7.61585	2.18954	Up_regulated
Zfp706	8.36877	1.01836	Up_regulated
Zfp740	7.67779	1.108	Up_regulated
Zfp770	9.57409	1.32634	Up_regulated
Zfp780b	7.6069	1.14213	Up_regulated
Zfp781	7.55553	1.37009	Up_regulated
Zfp788	7.23867	1.06153	Up_regulated
Zfp791	7.887	1.21161	Up_regulated
Zfp820	10.0586	1.37249	Up_regulated
Zfp85	7.36704	1.20245	Up_regulated
Zfp873	8.48716	1.39939	Up_regulated
Zfp930	9.5027	1.33743	Up_regulated
Zfp932	9.8451	1.02597	Up_regulated
Zfp934	8.62918	1.27077	Up_regulated
Zfp936	1.57742	13.7645	Up_regulated
Zfp941	7.90675	1.57198	Up_regulated
Zfp944	8.87788	1.49265	Up_regulated
Zfp951	8.87308	2.3452	Up_regulated
Zfp953	9.98254	1.89134	Up_regulated
Zfp958	7.92956	1.05391	Up_regulated
Zfp959	7.63778	1.12685	Up_regulated
Zfp960	11.2446	3.14802	Up_regulated
Zfp961	7.48996	3.33862	Up_regulated
Zfp97	8.03047	2.78243	Up_regulated
Zfp970	7.87576	1.17766	Up_regulated
Zfp975	9.05146	3.26957	Up_regulated
Zfp976	7.9768	3.0212	Up_regulated
Zfp977	9.71455	9.17792	Up_regulated
Zfp982	1.11231	8.24816	Up_regulated
Zfp985	1.18624	7.31814	Up_regulated
Zfp987	12.0879	12.8739	Up_regulated
Zfp990	1.90555	6.44912	Up_regulated
Zfy1	7.21299	7.04852	Up_regulated
Zfyve28	7.33475	4.7464	Up_regulated
Zic3	6.95794	6.44463	Up_regulated
Zmat4	11.1881	10.7467	Up_regulated
Zmiz2	9.48184	1.22471	Up_regulated
Znrf3	8.07971	1.2366	Up_regulated
Zranb3	8.00144	2.58924	Up_regulated
Zscan18	8.79525	2.75236	Up_regulated
Zscan4b	7.4597	4.9719	Up_regulated
Zscan4d	8.14638	5.87909	Up_regulated
Zyg11a	8.57349	6.8308	Up_regulated
2610008E11Rik	-1.32421	-1.73505	down_regulated
Aadat	-2.03275	-3.81835	down_regulated
Aifm2	-10.2725	-1.21955	down_regulated
Aldh1a1	-1.02489	-3.56734	down_regulated
Alox5	-1.18879	-1.61699	down_regulated
Amot	-10.8626	-4.05599	down_regulated
Ano3	-1.59195	-3.49718	down_regulated
Apba1	-1.044	-2.68409	down_regulated
Ar	-1.32999	-2.70631	down_regulated
Arap2	-1.8433	-2.21917	down_regulated
Arg1	-9.50528	-3.68119	down_regulated
Arhgap10	-9.78015	-2.36745	down_regulated
Arhgap6	-9.86278	-4.68404	down_regulated
Arl6ip5	-1.28745	-1.86031	down_regulated
Birc7	-1.11429	-1.67289	down_regulated
Cacna2d1	-1.22582	-3.45851	down_regulated
Cacnb3	-9.62325	-1.1758	down_regulated
Cap1	-9.73262	-1.13957	down_regulated
Cd200r2	-9.64533	-5.76152	down_regulated
Cd46	-9.96112	-2.43841	down_regulated
Cerk	-1.26647	-3.00389	down_regulated
Cmtm3	-1.19799	-2.90754	down_regulated
Cntn1	-1.22492	-5.20483	down_regulated
Col19a1	-2.66832	-5.87378	down_regulated
Col3a1	-1.12205	-2.21157	down_regulated
Col6a2	-1.49719	-2.23699	down_regulated
Cplx2	-1.8463	-3.98526	down_regulated
Ctnna2	-1.67803	-3.009	down_regulated
Ctso	-1.57127	-2.94901	down_regulated
Dach2	-2.64618	-2.1574	down_regulated
Dap	-1.17186	-3.45515	down_regulated
Dcaf5	-1.28775	-1.33226	down_regulated
Dcc	-1.82956	-6.22822	down_regulated
Dgkb	-1.04427	-3.59917	down_regulated
Dlgap4	-1.27119	-1.46852	down_regulated
Dpp4	-1.73176	-1.53376	down_regulated
Dtnbp1	-1.26236	-1.56003	down_regulated
Efnb2	-1.55903	-3.14266	down_regulated
Ehbp1	-1.33351	-1.4421	down_regulated
Eif4e3	-9.42926	-3.42159	down_regulated
Epdr1	-9.64908	-3.78583	down_regulated
Ercc6	-9.92646	-1.68903	down_regulated
F3	-1.25667	-4.12441	down_regulated
Fam124a	-9.77759	-4.23377	down_regulated
Fam20c	-1.28065	-4.95988	down_regulated
Fap	-1.5262	-2.73765	down_regulated
Fgfbp3	-1.12212	-3.27175	down_regulated
Filip1l	-1.56448	-5.39154	down_regulated
Fkbp7	-9.80031	-2.98755	down_regulated
Flt4	-1.55211	-5.31039	down_regulated
Fmn1	-1.47212	-3.7174	down_regulated
Fosl2	-9.5826	-4.14858	down_regulated
Fzd8	-1.53201	-1.83797	down_regulated
Gab2	-1.14836	-3.93479	down_regulated
Gata6	-9.42353	-2.22678	down_regulated
Gjb4	-9.66428	-2.14979	down_regulated
Gorab	-1.25606	-1.28249	down_regulated
Gpc4	-1.56251	-3.15623	down_regulated
Gpc5	-1.54038	-5.80104	down_regulated
Gphn	-1.02218	-1.19486	down_regulated
Gpr85	-1.08587	-3.94761	down_regulated
Gpx3	-1.09526	-1.81162	down_regulated
Gypc	-1.29058	-5.66714	down_regulated
Hmcn1	-10.8426	-2.49316	down_regulated
Hrh1	-1.43126	-2.06024	down_regulated
Hspa12b	-1.06744	-3.77016	down_regulated
Htr1b	-1.50294	-4.31214	down_regulated
Ica1	-1.3514	-3.32819	down_regulated
Ifih1	-9.75971	-5.03448	down_regulated
Ifit1bl2	-1.04817	-3.80346	down_regulated
Igfbp5	-1.06341	-1.2936	down_regulated
Igfbp7	-9.48285	-4.41337	down_regulated
Il1rap	-1.40422	-3.0792	down_regulated
Irf4	-1.11844	-3.58835	down_regulated
Irs4	-9.97862	-1.52338	down_regulated
Itpkb	-1.35511	-3.16526	down_regulated
Jph1	-1.39313	-1.68869	down_regulated
Kcnh7	-1.57277	-2.59789	down_regulated
Kcnj2	-2.16884	-1.63265	down_regulated
Kif1a	-1.21589	-2.76565	down_regulated
Klf4	-1.84974	-1.18336	down_regulated
Lilrb4a	-1.17666	-3.83474	down_regulated
Lor	-10.0174	-3.21801	down_regulated
Lrp2	-1.34619	-1.85401	down_regulated
Lrrc8c	-1.2948	-4.33292	down_regulated
Lyn	-10.1159	-2.42618	down_regulated
Man1a	-1.73743	-2.17048	down_regulated
Mbp	-9.85347	-1.50513	down_regulated
Mfhas1	-9.90486	-3.78689	down_regulated
Mlycd	-1.15899	-2.72623	down_regulated
Mmd	-1.1018	-3.0319	down_regulated
Msrb3	-1.13529	-4.30648	down_regulated
Msx1	-1.29357	-1.72148	down_regulated
Myc	-11.8268	-3.59661	down_regulated
Nap1l3	-1.3914	-1.57325	down_regulated
Nfic	-9.29753	-2.19419	down_regulated
Nipal1	-1.63353	-3.06401	down_regulated
Nkd2	-1.7033	-1.44647	down_regulated
Npas3	-1.08659	-3.71603	down_regulated
Npnt	-10.1237	-4.13268	down_regulated
Nr2f2	-1.13797	-3.95511	down_regulated
Ntf3	-9.46717	-4.43976	down_regulated
Ntng1	-2.06367	-8.56487	down_regulated
P2ry10b	-10.6471	-5.88236	down_regulated
Palld	-1.32086	-2.62468	down_regulated
Pbp2	-1.54755	-9.75462	down_regulated
Pcdh18	-1.21638	-6.09748	down_regulated
Pde3b	-1.15995	-1.41999	down_regulated
Pdgfc	-1.15731	-1.24731	down_regulated
Pdgfd	-1.35413	-4.4029	down_regulated
Pex2	-1.50486	-3.47467	down_regulated
Pitx1	-9.48788	-4.05577	down_regulated
Pou3f4	-2.06717	-4.04458	down_regulated
Prl3a1	-9.69523	-10.642	down_regulated
Prr5l	-1.08174	-3.3517	down_regulated
Prss12	-1.01529	-3.42855	down_regulated
Prss23	-10.0104	-5.20485	down_regulated
Pxdn	-1.12844	-4.17924	down_regulated
Rab2a	-2.4511	-1.53205	down_regulated
Rasgrf2	-1.18339	-3.81308	down_regulated
Rft1	-9.72848	-1.08919	down_regulated
Rnf24	-1.32884	-1.04639	down_regulated
S1pr2	-9.59527	-1.04978	down_regulated
Samd4	-1.20829	-4.25576	down_regulated
Scel	-1.63435	-8.02692	down_regulated
Sdc2	-1.24731	-2.35856	down_regulated
Selenoi	-9.64624	-2.04192	down_regulated
Serpinb8	-1.44854	-5.21436	down_regulated
Slc35d1	-1.20886	-1.55161	down_regulated
Slc5a3	-1.02946	-2.32966	down_regulated
Slc5a8	-1.05773	-3.39457	down_regulated
Slc8a3	-9.50986	-2.28732	down_regulated
Snx13	-1.03513	-1.14731	down_regulated
Snx19	-1.83476	-2.14869	down_regulated
Sppl2b	-10.4587	-1.28265	down_regulated
Sprr1a	-1.09448	-7.66459	down_regulated
Ssh2	-1.35682	-1.17705	down_regulated
Sspn	-1.1295	-4.83018	down_regulated
St3gal5	-1.27322	-2.81632	down_regulated
Stx8	-1.11641	-1.00744	down_regulated
Tanc2	-10.2326	-1.99831	down_regulated
Tent5a	-1.13599	-2.1253	down_regulated
Tgfbr2	-1.0683	-2.67054	down_regulated
Tll1	-2.63472	-6.16207	down_regulated
Tmem119	-1.4825	-2.02167	down_regulated
Tmem219	-9.61888	-1.04648	down_regulated
Tmtc2	-1.1634	-3.63343	down_regulated
Tns2	-1.26676	-2.97887	down_regulated
Trib2	-1.05656	-2.87734	down_regulated
Trpc6	-1.05045	-2.72813	down_regulated
Tspo	-9.65116	-2.81184	down_regulated
Tuba8	-9.59348	-6.41728	down_regulated
Uncx	-1.39474	-5.17018	down_regulated
Usp25	-9.89766	-2.9289	down_regulated
Uts2b	-2.0725	-8.30052	down_regulated
Xirp2	-1.60021	-5.04777	down_regulated
Zfp316	-1.49318	-2.68612	down_regulated
Zfp651	-9.52963	-2.64719	down_regulated
Zfp677	-9.63019	-2.18863	down_regulated
