# Supplementary material for: The Cumulative Formation of R-loop Interacts with Histone Modifications to Shape Cell Reprogramming
Source: Int J Mol Sci. 2022 Jan 29;23(3):1567. doi: 10.3390/ijms23031567 (PMC8835745; doi:10.3390/ijms23031567)
Supplement: Supplementary file 1 [file ijms-23-01567-s001.zip › Table S4.xlsx]

## Sheet: Table S4
Table S4. The detailed information of key genes of R1-R6 represented in Wordclouds.
Gene	log2FoldChange	Corr	Membership	Group
1700029P11Rik	8.52558	0.969963	0.8268	R1
2410141K09Rik	13.3238	0.961031	0.947226	R1
Acsbg2	7.74296	0.950706	0.795144	R1
Acsm4	6.56374	0.999993	0.947857	R1
Aqp6	5.28748	0.907007	0.59558	R1
Arhgap19	2.913	0.964944	0.852982	R1
B4galnt2	2.52767	0.894341	0.59617	R1
Ccdc40	3.51973	0.949718	0.704373	R1
Ccr4	8.46693	0.992204	0.946963	R1
Ceacam20	5.14008	0.994212	0.929704	R1
Clca3a1	-2.68469	0.938371	0.689319	R1
Cldn15	2.46774	0.895524	0.286743	R1
Clvs2	6.97649	0.96996	0.840146	R1
Cplx1	4.10502	0.957531	0.759088	R1
Crtac1	4.71376	0.950284	0.729237	R1
D1Pas1	10.8705	0.99746	0.949946	R1
D630039A03Rik	2.54525	0.843561	0.865952	R1
Dennd2c	2.53571	0.758438	0.91953	R1
Dnajc6	8.13828	0.805523	0.946606	R1
Dppa2	9.8021	0.995896	0.931505	R1
Dppa3	9.62931	0.967232	0.808078	R1
Echdc2	2.14258	0.915951	0.610537	R1
Elovl2	7.65245	0.980494	0.893901	R1
Fam169a	5.73236	0.99001	0.902284	R1
Fam178b	7.29852	0.876185	0.94332	R1
Foxe1	4.66562	0.989264	0.889661	R1
Frem2	5.73224	0.910023	0.663146	R1
Galnt6	4.76086	0.990291	0.885997	R1
Galnt9	3.70369	0.716037	0.919744	R1
Gm10324	10.8988	0.937037	0.949255	R1
Gm12569	8.19725	1	0.946606	R1
Gm14124	9.47824	0.999994	0.947753	R1
Gm14295	2.32934	0.72356	0.390417	R1
Gm14440	3.02259	0.899611	0.602622	R1
Gm8909	10.4812	0.99652	0.958316	R1
Gnat1	5.72242	1	0.946606	R1
Grik3	6.0533	0.757401	0.934419	R1
H2afx	2.85084	0.961803	0.778591	R1
Hlf	4.66817	0.990615	0.905572	R1
Icosl	5.75812	0.994812	0.932206	R1
Ifitm1	6.75171	0.923362	0.639796	R1
Igsf9	3.1336	0.779845	0.42992	R1
Izumo2	5.16801	0.835978	0.446596	R1
Kcnq3	3.14982	0.776262	0.258491	R1
Kif18a	2.035	0.770987	0.416173	R1
Kif26a	2.63417	0.990344	0.876858	R1
Ldhc	6.55255	0.904042	0.59652	R1
Lrfn1	2.09466	0.761558	0.599891	R1
Mep1b	10.4063	0.822974	0.946606	R1
Mgat5b	4.06995	0.993416	0.940467	R1
Mip	4.46923	0.999678	0.950384	R1
Mkrn3	2.62451	0.87169	0.506564	R1
Myom3	4.56844	0.719223	0.434187	R1
Nlrp12	11.6418	0.999949	0.950771	R1
Nmnat3	-3.92454	1	0.946606	R1
Nr1i2	4.5047	0.748974	0.60893	R1
Nrg4	2.76508	0.853037	0.528399	R1
Nrn1	-5.97985	0.896398	0.838744	R1
Nrxn2	4.195	0.739491	0.328879	R1
Padi2	6.27944	0.97231	0.839973	R1
Padi3	6.56374	0.99989	0.95124	R1
Pard6b	2.47011	0.812535	0.392887	R1
Parp1	3.10009	0.765245	0.84361	R1
Pcgf6	2.42409	0.965437	0.826691	R1
Phyhipl	4.94923	0.890869	0.551352	R1
Pla2g4e	10.3673	1	0.946606	R1
Plekha4	2.51865	0.71287	0.362342	R1
Plekhd1	7.9735	0.946263	0.745466	R1
Prdm14	11.3982	0.997704	0.947564	R1
Rad9b	2.133	0.850225	0.504083	R1
Rap1gap2	-2.88957	0.844484	0.465745	R1
Rimkla	6.46571	0.977296	0.909221	R1
Rundc3b	2.80578	0.99395	0.940262	R1
Sall4	13.2177	0.98296	0.910668	R1
Sarm1	4.23476	0.859737	0.516278	R1
Sinhcaf	3.02703	0.714679	0.628036	R1
Six4	2.72823	0.887859	0.758095	R1
Slc25a34	5.15199	0.9601	0.770141	R1
Slc6a1	10.7088	0.993487	0.936233	R1
Sntb1	3.05931	-0.873016	0.634364	R1
Sox15	9.37784	0.791025	0.378731	R1
Spink1	5.35719	1	0.946606	R1
Spint2	4.30045	0.828225	0.416164	R1
Stx3	2.81043	0.788863	0.946606	R1
Suz12	2.30101	0.903934	0.628479	R1
Sycp2l	6.87744	0.997277	0.943674	R1
Sytl3	6.45708	-0.960127	0.609063	R1
Tcof1	2.32458	0.777928	0.395081	R1
Ticrr	4.36295	0.99433	0.95152	R1
Tmem79	3.23747	0.847516	0.42729	R1
Tunar	8.38472	0.869462	0.510948	R1
Tyro3	2.23863	0.999979	0.946334	R1
Ulk1	2.80706	0.992664	0.953527	R1
Zfp345	9.06704	0.999718	0.953644	R1
Zfp534	11.2441	0.788637	0.948346	R1
Zfp936	13.7645	0.704228	0.940194	R1
Zfp960	3.14802	0.929498	0.642278	R1
Zfp987	12.8739	0.756294	0.946606	R1
Zfp990	6.44912	0.889009	0.844423	R1
Zfy1	7.04852	1	0.946606	R1
Zscan4b	4.9719	0.95705	0.715651	R1
1810062G17Rik	-3.98498	-0.819966	0.678667	R2
A3galt2	-3.98891	0.921212	0.344435	R2
Ano3	-3.49718	0.739388	0.559151	R2
Apba1	-2.68409	0.857496	0.415618	R2
Ar	-2.70631	0.804805	0.363995	R2
Arhgap10	-2.36745	0.873256	0.650536	R2
Arsk	-2.84238	-0.786554	0.401559	R2
Cacna2d3	-5.10485	-0.750092	0.491187	R2
Cast	-2.14795	0.700785	0.248701	R2
Ccdc50	-2.03451	-0.891704	0.44068	R2
Ccng1	-2.29042	-0.800146	0.509475	R2
Cfap54	-3.29807	-0.778391	0.293419	R2
Cflar	-4.05555	-0.836443	0.253397	R2
Corin	-7.73151	0.724656	0.35926	R2
Cpne2	-3.39704	-0.941225	0.47755	R2
Dach2	-2.1574	0.776895	0.472822	R2
Endod1	-3.08743	-0.748858	0.621073	R2
Fabp5	-3.55767	-0.905041	0.383741	R2
Fsd1l	2.75607	-0.862427	0.341888	R2
Gm28710	-5.12013	-0.863852	0.478398	R2
Gpc5	-5.80104	0.807111	0.627075	R2
Hacd4	-3.97414	-0.816721	0.345462	R2
Hoxc10	-3.30386	-0.898432	0.509195	R2
Inka2	-3.51421	-0.927081	0.545367	R2
Klra2	-8.2776	-0.806598	0.347722	R2
Lrrc75a	-3.6383	-0.931503	0.37873	R2
Lyn	-2.42618	0.700925	0.39606	R2
Mafk	-3.08269	-0.885878	0.35696	R2
Mef2a	-2.49222	-0.728479	0.271023	R2
Mpdz	-3.7125	0.884474	0.230868	R2
Nr2f2	-3.95511	0.789788	0.364775	R2
Pbp2	-9.75462	0.703027	0.561289	R2
Phc2	-2.64694	0.887833	0.366803	R2
Phlda1	-4.14731	-0.909351	0.434683	R2
Phlda3	-2.05737	-0.723328	0.39186	R2
Pitx1	-4.05577	0.949807	0.534593	R2
Plb1	-2.368	0.79834	0.266898	R2
Prkce	-2.66365	-0.801162	0.378918	R2
Ptpdc1	-2.34339	-0.705571	0.569037	R2
Rhobtb1	-3.80487	0.719662	0.344435	R2
Ripor2	-6.53602	0.880998	0.343701	R2
Selenoi	-2.04192	0.77631	0.562125	R2
Slc5a3	-2.32966	0.804192	0.6345	R2
Sox9	-2.48958	-0.783306	0.392817	R2
Spon2	-4.84995	0.79436	0.411265	R2
Stat6	-2.23024	-0.730406	0.435831	R2
Tet3	-2.73952	-0.910787	0.298432	R2
Top2b	-2.22641	-0.742482	0.377625	R2
Tuba8	-6.41728	0.90648	0.544002	R2
Vwde	-3.79281	-0.783731	0.727497	R2
Wipf1	-2.2861	-0.822583	0.530299	R2
Zfp651	-2.64719	0.759731	0.417347	R2
Amot	-4.05599	0.836246	0.929234	R3
Bnc1	-3.933	-0.7624	0.622769	R3
Chid1	-3.255	-0.866614	0.279466	R3
Clec4d	-4.44134	-0.827144	0.874517	R3
Col6a2	-2.23699	0.757443	0.737685	R3
Dcc	-6.22822	0.748948	0.835072	R3
Dlk1	-4.22478	-0.772638	0.264558	R3
Dok6	-6.68839	-0.775357	0.842869	R3
Eln	-3.12739	-0.845463	0.864891	R3
Filip1l	-5.39154	0.751015	0.810441	R3
Flt4	-5.31039	0.86855	0.74372	R3
Fosl2	-4.14858	0.951333	0.556518	R3
Foxl1	-6.72991	-0.873558	0.583777	R3
Gdnf	-5.50383	-0.77895	0.939721	R3
Gjb4	-2.14979	0.963841	0.812015	R3
Gramd3	-2.62946	-0.744511	0.37619	R3
Gria2	-6.45745	-0.785671	0.532278	R3
Hacd1	-2.6731	-0.73949	0.265348	R3
Hhat	-2.63629	-0.719103	0.794652	R3
Hist1h2bq	-2.53569	-0.729151	0.29851	R3
Lmbrd1	-2.1888	-0.731768	0.479462	R3
Lrrk2	-3.15263	-0.725476	0.560692	R3
Ltbp2	-2.61248	-0.974046	0.63783	R3
Manea	-2.0348	-0.814442	0.495362	R3
Nckap5	-3.05804	-0.798133	0.451162	R3
Nfil3	-2.88754	-0.895039	0.783295	R3
Ntf3	-4.43976	0.872287	0.74866	R3
P3h2	-4.87352	-0.717728	0.785805	R3
Pkdcc	-3.51784	-0.741953	0.838982	R3
Podnl1	-4.10861	-0.931725	0.893156	R3
Prl3a1	-10.642	0.978644	0.942191	R3
Prss23	-5.20485	0.981726	0.931021	R3
Samd4	-4.25576	0.748517	0.75629	R3
Slc41a2	-3.14976	-0.775738	0.634845	R3
Slc8a3	-2.28732	0.897456	0.780304	R3
Slc9a7	-2.24406	-0.702647	0.697761	R3
Sost	-3.23039	-0.770529	0.329876	R3
Specc1	-5.27756	-0.707229	0.423688	R3
Tagln	-5.41233	-0.775711	0.939544	R3
Tnfrsf11b	-5.59997	-0.781863	0.942786	R3
Upp2	-4.46741	-0.861638	0.622495	R3
Cyp1a1	-2.8255	0.889305	0.356812	R4
Elmo1	2.01053	-0.844123	0.240332	R4
Flvcr2	2.57647	-0.708759	0.339971	R4
H2afv	2.27728	0.724333	0.343262	R4
Mtfp1	4.89508	-0.766231	0.487984	R4
Nr4a2	-3.22167	0.77622	0.253144	R4
Nxpe4	-3.20864	0.706324	0.42903	R4
Ptma	2.24105	-0.751479	0.515409	R4
Tex19.2	7.29015	0.889733	0.413937	R4
Vil1	3.55191	0.770844	0.362296	R4
Cwh43	4.03045	0.826199	0.743229	R5
Dusp5	-2.02147	-0.78526	0.500284	R5
Esx1	8.64622	-0.708611	0.380147	R5
Fgfbp3	-3.27175	-0.7705	0.684895	R5
Impa2	3.48709	0.843823	0.535288	R5
Itgb5	-2.11396	0.714786	0.703751	R5
Myh2	-8.87157	0.763617	0.674134	R5
Plin2	-3.04717	-0.762092	0.249766	R5
Sardh	-3.27801	0.819036	0.530667	R5
Wnt9a	-2.07848	-0.708095	0.260421	R5
Alms1	2.41616	0.757369	0.284672	R6
Amotl1	-3.15292	-0.700159	0.399745	R6
Aspa	-8.11171	0.800779	0.519305	R6
Bfsp1	-2.46448	0.709312	0.318555	R6
Clstn3	7.37258	0.778004	0.262481	R6
Edaradd	-3.51214	-0.76073	0.437785	R6
Itpr2	-3.297	-0.865808	0.355578	R6
Lama4	-4.00571	0.835306	0.370066	R6
Nemp1	2.18067	-0.734416	0.395778	R6
Nppb	-3.00711	-0.711486	0.503294	R6
Pax6	5.99055	0.775106	0.28559	R6
Scara5	-3.51214	-0.783073	0.492524	R6
Slc2a12	-5.83374	-0.88519	0.350857	R6
Tspan7	-3.37194	-0.78816	0.345641	R6
Tspyl5	-2.00068	-0.799272	0.530352	R6
